# Supplementary material for: The emission efficiency of cationic solid state luminophores is directly proportional to the intermolecular charge transfer intensity
Source: Royal Society of Chemistry journal article supplement (doi:10.1039/d3cc01674a), 2023-01-01

**Emission efficiency of cationic solid state luminophores is directly proportional to  
intermolecular charge transfer intensity**

Kaspars Leduskrasts, Artis Kinens, Edgars Suna\*

*Latvian Institute of Organic Synthesis, Aizkraukles 21, LV-1006, Riga, Latvia*

[edgars@osi.lv](mailto:edgars@osi.lv)

**Contents**

|                                                                             |     |
|-----------------------------------------------------------------------------|-----|
| General considerations.....                                                 | S2  |
| Synthesis of emitters <b>1–4</b> .....                                      | S3  |
| Synthesis of emitter <b>2a</b> .....                                        | S3  |
| Synthesis of emitter <b>3</b> .....                                         | S6  |
| Synthesis of emitter <b>4a</b> .....                                        | S8  |
| Synthesis of emitter <b>4b</b> .....                                        | S10 |
| Luminescence spectra .....                                                  | S11 |
| X-Ray Structure, crystal data and structure refinements for <b>2a</b> ..... | S20 |
| X-Ray Structure, crystal data and structure refinements for <b>2b</b> ..... | S21 |
| X-Ray Structure, crystal data and structure refinements for <b>3</b> .....  | S22 |
| X-Ray Structure, crystal data and structure refinements for <b>4a</b> ..... | S23 |
| X-Ray Structure, crystal data and structure refinements for <b>4b</b> ..... | S24 |
| Quantum chemical calculations .....                                         | S25 |
| CTI analysis for luminophores <b>15–17</b> .....                            | S35 |
| <sup>1</sup> H and <sup>13</sup> C NMR data .....                           | S39 |

### General considerations

Column chromatography was performed using reversed phase C18-silica gel columns (RP18 25-40  $\mu\text{m}$ ) and direct phase silica gel columns.

Nuclear magnetic resonance spectra were recorded on NMR spectrometers at the following frequencies:  $^1\text{H}$ , 400 MHz, 300 MHz;  $^{13}\text{C}\{^1\text{H}\}$ , 101 MHz. Chemical shifts are reported in parts per million (ppm) relative to TMS or with the residual solvent peak as an internal reference. High-resolution mass spectra (HRMS (ESI-TOF)) were recorded on a mass spectrometer with a time-of-flight (TOF) mass analyzer using the ESI technique. Melting points are uncorrected.

Unless otherwise noted, all chemicals were used as received from commercial sources. Anhydrous THF was obtained by passing commercially available solvent through activated alumina columns.

The luminescence data was collected with Edinburgh Instruments FS5 Spectrofluorometer; photoluminescence quantum yields ( $\Phi$ ) were measured using an integrating sphere.

Single-crystal X-ray diffraction analyses were performed on Rigaku *XtaLAB Synergy S*, *Dualflex* apparatus with HyPix6000 detector and  $\text{CuK}_\alpha$  /  $\text{MoK}_\alpha$  radiation type.

### Synthesis of emitters 1–4

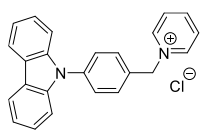

**1-(4-(9H-Carbazol-9-yl)benzyl)pyridin-1-ium chloride (1)** was synthesized according to a published protocol.<sup>1</sup> The <sup>1</sup>H NMR was fully consistent with the previous report.<sup>1</sup>

**<sup>1</sup>H NMR** (300 MHz, (CD<sub>3</sub>)<sub>2</sub>SO, ppm) δ 9.42–9.34 (m, 2H), 8.73–8.65 (m, 1H), 8.30–8.22 (m, 4H), 7.90–7.82 (m, 2H), 7.78–7.71 (m, 2H), 7.48–7.36 (m, 4H), 7.34–7.26 (m, 2H), 6.06 (s, 2H).

### Synthesis of emitter 2a

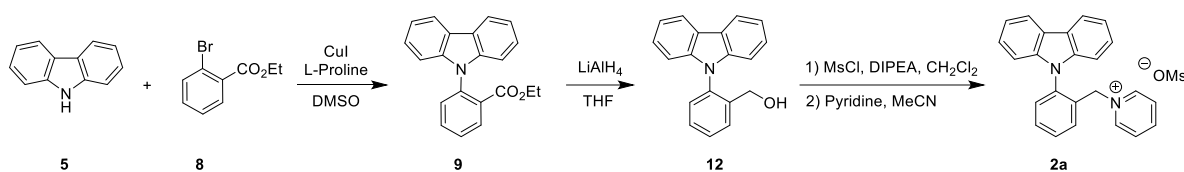

**Ethyl 2-(9H-carbazol-9-yl)benzoate (9).** Anhydrous DMSO (21 mL) was added *via* septa to a mixture of 9H-carbazole (**5**, 1.0 g, 6.0 mmol, 1.0 equiv), ethyl 2-bromobenzoate (**8**, 1.6 g, 7.2 mmol, 1.2 equiv), CuI (0.2 g, 0.9 mmol, 0.15 equiv), L-Proline (0.2 g, 1.8 mmol, 0.3 equiv) and K<sub>2</sub>CO<sub>3</sub> (2.5 g, 18 mmol, 3.0 equiv) in an argon-purged 100 mL round-bottom flask. The flask was sealed with rubber septa and heated at 140 °C for 72h. After cooling, the black suspension was diluted with water (100 mL), saturated aqueous ammonia (50 mL) and CH<sub>2</sub>Cl<sub>2</sub> (50 mL). Phases were separated, and the water phase was extracted with CH<sub>2</sub>Cl<sub>2</sub> (2×50 mL). The combined organic layers were dried over anhydrous Na<sub>2</sub>SO<sub>4</sub> and purified by silica gel column chromatography using 1:30 (v/v) EtOAc:petroleum ether as the mobile phase to obtain **9** as a colorless solid (1.1 g, 58%); analytical TLC on silica gel, 1:30 EtOAc/petroleum ether, R<sub>f</sub>=0.15. Analytically pure material was obtained by crystallization from EtOAc/hexane: mp 106–107 °C (colorless rectangles).

**<sup>1</sup>H NMR** (400 MHz, CDCl<sub>3</sub>, ppm) δ 8.17–8.13 (m, 3H), 7.79–7.73 (m, 1H), 7.65–7.57 (m, 2H), 7.42–7.36 (m, 2H), 7.30–7.25 (m, 2H), 7.16–7.12 (m, 2H), 3.66 (q, *J*=7.1 Hz, 2H), 0.39 (t, *J*=7.1 Hz, 3H).

**<sup>13</sup>C{<sup>1</sup>H} NMR** (101 MHz, CDCl<sub>3</sub>, ppm) δ 166.3, 141.8, 136.8, 133.4, 132.3, 130.9, 130.4, 128.6, 126.0, 123.3, 120.3, 119.9, 109.5, 61.2, 13.0.

**HRMS** *m/z*: [M]<sup>+</sup> calculated for C<sub>21</sub>H<sub>18</sub>NO<sub>2</sub><sup>+</sup>: 316.1332; Found: 316.1331.

**IR** (KBr, cm<sup>-1</sup>) 1720 (C=O).

**(2-(9H-Carbazol-9-yl)phenyl)methanol (12).** Anhydrous THF (10 mL) solution of to ethyl 2-(9H-carbazol-9-yl)benzoate (**9**, 1.0 g, 3.2 mmol, 1.0 equiv) was added to an anhydrous THF (10 mL) suspension of LiAlH<sub>4</sub> (0.5 g, 13 mmol, 4.0 equiv) in a sealed, Ar flushed 100 mL roundbottom flask at 0 °C. The sealed flask was heated at 70 °C for 1h. The reaction mixture was cooled and quenched by drop wise addition of water until gas evolution ceased, followed by addition of water (2 mL) and 15% aqueous NaOH solution (0.6 mL). The obtained suspension was filtered through a pad of celite, washed with EtOAc. The filtrate was dried over anhydrous Na<sub>2</sub>SO<sub>4</sub> and the organics evaporated to yield the product **12** as a colorless amorphous material (0.85 g, 98 %).

**<sup>1</sup>H NMR** (400 MHz, CDCl<sub>3</sub>, ppm) δ 8.19–8.14 (m, 2H), 7.82–7.78 (m, 1H), 7.63–7.57 (m, 1H), 7.55–7.50 (m, 1H), 7.42–7.36 (m, 3H), 7.32–7.27 (m, 2H), 7.06–7.02 (m, 2H), 4.34 (d, *J*=4.4 Hz, 2H), 1.53–1.47 (m, 1H).

**<sup>13</sup>C{<sup>1</sup>H} NMR** (101 MHz, CDCl<sub>3</sub>, ppm) δ 141.6, 140.1, 134.8, 129.6, 129.4, 129.3, 129.2, 126.3, 123.2, 120.6, 120.0, 109.7, 61.1.

**HRMS** *m/z*: [M]<sup>+</sup> calculated for C<sub>19</sub>H<sub>15</sub>NO<sup>+</sup>: 273.1154; Found: 273.1153.

**IR** (KBr, cm<sup>-1</sup>) 3447 (O–H).

**1-(2-(9H-Carbazol-9-yl)benzyl)pyridin-1-ium methanesulfonate (2a).** Anhydrous CH<sub>2</sub>Cl<sub>2</sub> (30 mL) was added to (2-(9H-carbazol-9-yl)phenyl)methanol (**12**, 0.85 g, 3.1 mmol, 1.0 equiv) in a 50 mL roundbottom flask at 0 °C. To the cooled colorless solution MsCl (0.5 mL, 6.2 mmol, 2.0 equiv) followed by DIPEA (2.2 mL, 12 mmol, 4.0 equiv) was added. The pale yellow solution was stirred in an ice bath. After 1h the reaction mixture was diluted with CH<sub>2</sub>Cl<sub>2</sub> (50 mL) and H<sub>2</sub>O (50 mL), the layers separated and the water layer washed with CH<sub>2</sub>Cl<sub>2</sub> (30 mL) one more time. The combined organics were dried over Na<sub>2</sub>SO<sub>4</sub> and evaporated to give a yellow oil. MeCN (15 mL) was added to the yellow oil to form a yellow solution. Pyridine (0.8 mL, 9.3 mmol, 3.0 equiv) was added to the yellow solution and stirred at room temperature. After 72h the reaction mixture was diluted with EtOAc (150 mL) and stirred at 0 °C. After 1h the resulting precipitate was filtered and washed with EtOAc and Et<sub>2</sub>O to give the product **2a** as a pale green solid (1.0 g, 75%). Analytically pure material was obtained by crystallization from MeCN/EtOAc: mp 227–228 °C (colorless plates).

**<sup>1</sup>H NMR** (400 MHz, (CD<sub>3</sub>)<sub>2</sub>SO, ppm) δ 8.25–8.14 (m, 5H), 7.89–7.83 (m, 1H), 7.82–7.76 (m, 2H), 7.64–7.58 (m, 2H), 7.57–7.51 (m, 1H), 7.36–7.25 (m, 4H), 6.88–6.82 (m, 2H), 5.60 (s, 2H), 2.30 (s, 3H).

**$^{13}\text{C}\{^1\text{H}\}$  NMR** (101 MHz,  $(\text{CD}_3)_2\text{SO}$ , ppm)  $\delta$  145.2, 143.8, 140.0, 135.4, 133.1, 132.4, 132.1, 130.7, 130.2, 127.5, 126.5, 122.5, 120.8, 120.4, 109.1, 60.8, 39.8.

**HRMS**  $m/z$ :  $[\text{M}]^+$  calculated for  $\text{C}_{24}\text{H}_{19}\text{N}_2^+$ : 335.1543; Found: 335.1556.

**IR** (KBr,  $\text{cm}^{-1}$ ) 1193 (S=O).

### Synthesis of compound 2b

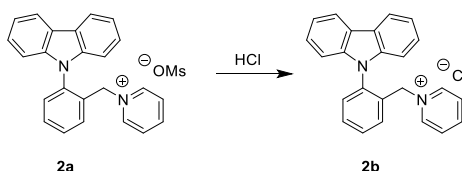

**1-(2-(9H-Carbazol-9-yl)benzyl)pyridin-1-ium chloride (2b)**. EtOH (6 mL) was added to 1-(2-(9H-carbazol-9-yl)benzyl)pyridin-1-ium methanesulfonate (**2a**, 0.20 g, 0.47 mmol). The pale green solution was subjected to reversed phase column chromatography using 0.1% HCl acidic water and MeCN as an eluent at a rate of 40 mL/min. Initial elution for 20 minutes with 5% MeCN followed by a 40 minute gradient from 5% to 95% MeCN afforded the desired material. After evaporation in *vacuo* the obtained oil was dissolved in MeCN (5 mL) to which EtOAc (50 mL) was slowly added. The formed precipitate was filtered, washed with EtOAc to give the product **2b** as a colorless crystals (0.16 g, 90%). Analytically pure material was obtained by crystallization from MeCN/Et<sub>2</sub>O: mp 212–214 °C (colorless prisms).

**$^1\text{H}$  NMR** (400 MHz,  $(\text{CD}_3)_2\text{SO}$ , ppm)  $\delta$  8.21–8.16 (m, 2H), 8.12–8.07 (m, 1H), 8.06–8.01 (m, 2H), 7.91–7.86 (m, 1H), 7.82–7.75 (m, 2H), 7.54–7.48 (m, 3H), 7.34–7.24 (m, 4H), 6.83–6.77 (m, 2H), 5.56 (s, 2H).

**$^{13}\text{C}\{^1\text{H}\}$  NMR** (101 MHz,  $(\text{CD}_3)_2\text{SO}$ , ppm)  $\delta$  145.3, 143.7, 140.2, 135.7, 133.3, 133.0, 132.6, 131.0, 130.6, 127.7, 127.0, 122.7, 121.1, 120.9, 109.3, 61.3.

**HRMS**  $m/z$ :  $[\text{M}]^+$  calculated for  $\text{C}_{24}\text{H}_{19}\text{N}_2^+$ : 335.1543; Found: 335.1551.

**IR** (KBr,  $\text{cm}^{-1}$ ) 3049 (C–H).

Synthesis of emitter **3**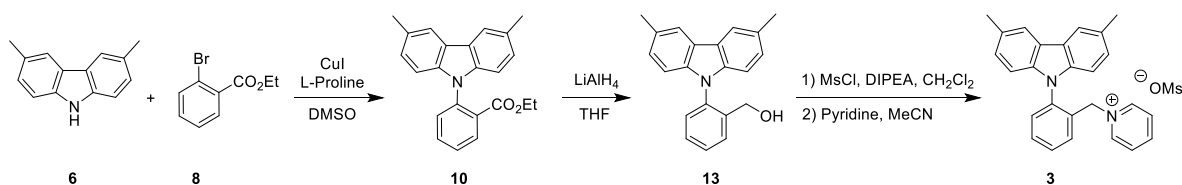

**Ethyl 2-(3,6-dimethyl-9H-carbazol-9-yl)benzoate (10).** Anhydrous DMSO (21 mL) was added *via* septa to a mixture of 3,6-dimethyl-9H-carbazole (**6**, 0.8 g, 4.3 mmol, 1.0 equiv), ethyl 2-bromobenzoate (**8**, 1.3 g, 5.5 mmol, 1.3 equiv), CuI (0.1 g, 0.6 mmol, 0.15 equiv), L-Proline (0.1 g, 1.3 mmol, 0.3 equiv) and K<sub>2</sub>CO<sub>3</sub> (1.8 g, 13 mmol, 3.0 equiv) in an argon-purged 100 mL round-bottom flask. The flask was sealed with rubber septa and heated at 140 °C for 72h. After cooling, the black suspension was diluted with water (100 mL), saturated aqueous ammonia (50 mL) and CH<sub>2</sub>Cl<sub>2</sub> (50 mL). Phases were separated, and the water phase was extracted with CH<sub>2</sub>Cl<sub>2</sub> (2×50 mL). The combined organic layers were dried over anhydrous Na<sub>2</sub>SO<sub>4</sub> and purified by silica gel column chromatography using 1:30 (v/v) EtOAc:petroleum ether as the mobile phase to obtain **10** as a viscous oil (1.0 g, 71%); analytical TLC on silica gel, 1:10 EtOAc/petroleum ether, R<sub>f</sub>=0.40.

**<sup>1</sup>H NMR** (400 MHz, CDCl<sub>3</sub>, ppm) δ 8.12–8.08 (m, 1H), 7.90–8.87 (m, 2H), 7.75–7.69 (m, 1H), 7.60–7.53 (m, 2H), 7.19–7.15 (m, 2H), 7.03–6.99 (m, 2H), 3.68 (q, *J*=7.1 Hz, 2H), 2.53 (s, 6H) 0.45 (t, *J*=7.1 Hz, 3H).

**<sup>13</sup>C{<sup>1</sup>H} NMR** (101 MHz, CDCl<sub>3</sub>, ppm) δ 166.5, 140.3, 137.3, 133.3, 132.1, 130.8, 130.2, 128.9, 128.2, 127.2, 123.4, 120.2, 109.1, 61.2, 21.6, 13.0.

**HRMS** *m/z*: [M]<sup>+</sup> calculated for C<sub>23</sub>H<sub>22</sub>NO<sub>2</sub><sup>+</sup>: 344.1651; Found: 344.1656.

**IR** (KBr, cm<sup>-1</sup>) 1713 (C=O).

**(2-(3,6-Dimethyl-9H-carbazol-9-yl)phenyl)methanol (13).** Anhydrous THF (10 mL) solution of to ethyl 2-(3,6-dimethyl-9H-carbazol-9-yl)benzoate (**10**, 0.8 g, 2.3 mmol, 1.0 equiv) was added to an anhydrous THF (10 mL) suspension of LiAlH<sub>4</sub> (0.4 g, 9.3 mmol, 4.0 equiv) in a sealed, Ar flushed 100 mL roundbottom flask at 0 °C. The sealed flask was heated at 70 °C for 1h. The reaction mixture was cooled and quenched by drop wise addition of water until gas evolution ceased, followed by addition of water (1.5 mL) and 15% aqueous NaOH solution (0.4 mL). The obtained suspension was filtered through a pad of celite, washed with EtOAc. The filtrate was dried over anhydrous Na<sub>2</sub>SO<sub>4</sub> and the organics evaporated to yield the product **13** as a viscous oil (0.67 g, 95 %).

**<sup>1</sup>H NMR** (400 MHz, CDCl<sub>3</sub>, ppm) δ 7.95–7.91 (m, 2H), 7.80–7.75 (m, 1H), 7.60–7.54 (m, 1H), 7.53–7.47 (m, 1H), 7.38–7.33 (m, 1H), 7.22–7.16 (m, 2H), 6.94–6.89 (m, 2H), 4.33 (s, 2H), 2.55 (s, 6H).

**<sup>13</sup>C{<sup>1</sup>H} NMR** (101 MHz, CDCl<sub>3</sub>, ppm) δ 140.2, 140.1, 135.3, 129.5, 129.3, 129.2, 129.1, 127.4, 123.2, 120.5, 109.3, 61.2, 21.5.

**HRMS** m/z: [M]<sup>+</sup> calculated for C<sub>21</sub>H<sub>19</sub>NO<sup>+</sup>: 301.1467; Found: 301.1469.

**IR** (KBr, cm<sup>-1</sup>) 3376 (O–H).

**1-(2-(3,6-Dimethyl-9H-carbazol-9-yl)benzyl)pyridin-1-ium methanesulfonate (3).**

Anhydrous CH<sub>2</sub>Cl<sub>2</sub> (30 mL) was added to (2-(3,6-dimethyl-9H-carbazol-9-yl)phenyl)methanol (**13**, 0.6 g, 2.0 mmol, 1.0 equiv) in a 50 mL roundbottom flask at 0 °C. To the cooled colorless solution MsCl (0.3 mL, 4.0 mmol, 2.0 equiv) followed by DIPEA (1.4 mL, 8.0 mmol, 4.0 equiv) was added. The pale yellow solution was stirred in an ice bath. After 1h the reaction mixture was diluted with CH<sub>2</sub>Cl<sub>2</sub> (50 mL) and H<sub>2</sub>O (50 mL), the layers separated and the water layer washed with CH<sub>2</sub>Cl<sub>2</sub> (30 mL) one more time. The combined organics were dried over Na<sub>2</sub>SO<sub>4</sub> and evaporated to give a yellow oil. MeCN (15 mL) was added to the yellow oil to form a yellow solution. Pyridine (1.6 mL, 20 mmol, 10 equiv) was added to the yellow solution and stirred at room temperature. After 72h the reaction mixture was diluted with Et<sub>2</sub>O (150 mL) and stirred at 0 °C. After 1h the resulting precipitate was filtered and washed with Et<sub>2</sub>O to give the product **3** as a colorless solid (0.84 g, 92%). Analytically pure material was obtained by crystallization from MeCN/Et<sub>2</sub>O: decomposition 230–250 °C (colorless prisms).

**<sup>1</sup>H NMR** (400 MHz, CD<sub>3</sub>OD, ppm) δ 8.00–7.94 (m, 2H), 7.90–7.88 (m, 2H), 7.84–7.76 (m, 4H), 7.55–7.50 (m, 1H), 7.39–7.33 (m, 2H), 7.14–7.11 (m, 2H), 6.70–6.65 (m, 2H), 5.56 (s, 2H), 2.67 (s, 3H), 2.51 (s, 6H).

**<sup>13</sup>C{<sup>1</sup>H} NMR** (101 MHz, CD<sub>3</sub>OD, ppm) δ 145.7, 144.2, 139.7, 137.6, 134.4, 134.3, 133.6, 132.4, 131.4, 131.2, 128.8, 128.5, 124.2, 121.6, 109.7, 63.5, 39.5, 21.4.

**HRMS** m/z: [M]<sup>+</sup> calculated for C<sub>26</sub>H<sub>23</sub>N<sub>2</sub><sup>+</sup>: 363.1861; Found: 363.1861.

**IR** (KBr, cm<sup>-1</sup>) 1192 (S=O).

## Synthesis of emitter 4a

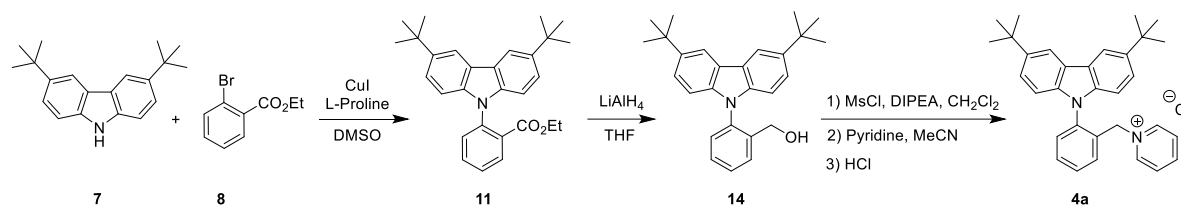

**Ethyl 2-(3,6-di-*tert*-butyl-9*H*-carbazol-9-yl)benzoate (11).** Anhydrous DMSO (18 mL) was added *via* septa to a mixture of 3,6-di-*tert*-butyl-9*H*-carbazole (**7**, 1.4 g, 5.0 mmol, 1.0 equiv), ethyl 2-bromobenzoate (**8**, 1.5 g, 6.5 mmol, 1.3 equiv), CuI (0.1 g, 0.8 mmol, 0.15 equiv), L-Proline (0.2 g, 1.5 mmol, 0.3 equiv) and K<sub>2</sub>CO<sub>3</sub> (2.1 g, 15 mmol, 3.0 equiv) in an argon-purged 100 mL round-bottom flask. The flask was sealed with rubber septa and heated at 140 °C for 72h. After cooling, the black suspension was diluted with water (100 mL), saturated aqueous ammonia (50 mL) and CH<sub>2</sub>Cl<sub>2</sub> (50 mL). Phases were separated, and the water phase was extracted with CH<sub>2</sub>Cl<sub>2</sub> (2×50 mL). The combined organic layers were dried over anhydrous Na<sub>2</sub>SO<sub>4</sub> and purified by silica gel column chromatography using 1:30 (v/v) EtOAc:petroleum ether as the mobile phase to obtain **11** as an amorphous material (1.4 g, 67%); analytical TLC on silica gel, 1:10 EtOAc/petroleum ether, R<sub>f</sub>=0.45.

**<sup>1</sup>H NMR** (400 MHz, CDCl<sub>3</sub>, ppm) δ 8.13–8.08 (m, 3H), 7.75–7.69 (m, 1H), 7.59–7.54 (m, 2H), 7.43–7.39 (m, 2H), 7.07–7.02 (m, 2H), 3.69 (q, *J*=7.1 Hz, 2H), 1.45 (s, 18H) 0.42 (t, *J*=7.1 Hz, 3H).

**<sup>13</sup>C{<sup>1</sup>H} NMR** (101 MHz, CDCl<sub>3</sub>, ppm) δ 166.5, 142.7, 140.3, 137.3, 133.2, 132.1, 130.7, 130.2, 128.1, 123.7, 123.4, 116.3, 108.9, 61.2, 34.9, 32.2, 13.0.

**HRMS** *m/z*: [M]<sup>+</sup> calculated for C<sub>29</sub>H<sub>34</sub>NO<sub>2</sub><sup>+</sup>: 428.2590; Found: 428.2582.

**IR** (KBr, cm<sup>-1</sup>) 1716 (C=O).

**(2-(3,6-Di-*tert*-butyl-9*H*-carbazol-9-yl)phenyl)methanol (14).** Anhydrous THF (10 mL) solution of to ethyl ethyl 2-(3,6-di-*tert*-butyl-9*H*-carbazol-9-yl)benzoate (**11**, 1.2 g, 2.8 mmol, 1.0 equiv) was added to an anhydrous THF (10 mL) suspension of LiAlH<sub>4</sub> (0.4 g, 11 mmol, 4.0 equiv) in a sealed, Ar flushed 100 mL roundbottom flask at 0 °C. The sealed flask was heated at 70 °C for 1h. The reaction mixture was cooled and quenched by drop wise addition of water until gas evolution ceased, followed by addition of water (2 mL) and 15% aqueous NaOH solution (0.6 mL). The obtained suspension was filtered through a pad of celite, washed



with EtOAc. The filtrate was dried over anhydrous Na<sub>2</sub>SO<sub>4</sub> and the organics evaporated to yield the product **15** as an amorphous material (0.83 g, 77 %).

**<sup>1</sup>H NMR** (400 MHz, CDCl<sub>3</sub>, ppm) δ 8.18–8.13 (m, 2H), 7.83–7.76 (m, 1H), 7.61–7.54 (m, 1H), 7.53–7.46 (m, 1H), 7.45–7.40 (m, 2H), 7.37–7.32 (m, 1H), 6.98–6.92 (m, 2H), 4.38 (d, *J*=4.9 Hz, 2H), 1.47 (s, 18H).

**<sup>13</sup>C{<sup>1</sup>H} NMR** (101 MHz, CDCl<sub>3</sub>, ppm) δ 142.9, 140.2, 140.1, 135.4, 129.5, 129.3, 129.2, 129.1, 123.9, 123.2, 116.5, 109.1, 61.3, 34.9, 32.2.

**HRMS** *m/z*: [M]<sup>+</sup> calculated for C<sub>27</sub>H<sub>31</sub>NO<sup>+</sup>: 385.2406; Found: 385.2411.

**IR** (KBr, cm<sup>-1</sup>) 3348 (O–H).

**1-(2-(3,6-Di-*tert*-butyl-9*H*-carbazol-9-yl)benzyl)pyridin-1-ium chloride (4a).** Anhydrous CH<sub>2</sub>Cl<sub>2</sub> (30 mL) was added to (2-(3,6-di-*tert*-butyl-9*H*-carbazol-9-yl)phenyl)methanol (**14**, 0.4 g, 1.0 mmol, 1.0 equiv) in a 50 mL roundbottom flask at 0 °C. To the cooled colorless solution MsCl (0.2 mL, 2.0 mmol, 2.0 equiv) followed by DIPEA (0.7 mL, 4.0 mmol, 4.0 equiv) was added. The pale yellow solution was stirred in an ice bath. After 1h the reaction mixture was diluted with CH<sub>2</sub>Cl<sub>2</sub> (50 mL) and H<sub>2</sub>O (50 mL), the layers separated and the water layer washed with CH<sub>2</sub>Cl<sub>2</sub> (30 mL) one more time. The combined organics were dried over Na<sub>2</sub>SO<sub>4</sub> and evaporated to give a yellow oil. MeCN (15 mL) was added to the yellow oil to form a yellow solution. Pyridine (0.8 mL, 9.9 mmol, 10 equiv) was added to the yellow solution and stirred at room temperature. After 72h the reaction mixture was directly subjected to reversed phase column chromatography using 0.1% HCl acidic water and MeCN as an eluent at a rate of 40 mL/min. Initial elution for 20 minutes with 5% MeCN followed by a 40 minute gradient from 5% to 95% MeCN afforded the desired material. After evaporation *in vacuo* the obtained oil was dissolved in MeCN (5 mL) to which Et<sub>2</sub>O (50 mL) was slowly added. The formed precipitate was filtered, washed with EtOAc to give the product **4a** as a colorless crystals (0.41 g, 86%). Analytically pure material was obtained by crystallization from MeCN/EtOAc: mp 219–220 °C (colorless prisms).

**<sup>1</sup>H NMR** (400 MHz, CD<sub>3</sub>OD, ppm) δ 8.18–8.16 (m, 2H), 8.02–7.93 (m, 2H), 7.86–7.76 (m, 4H), 7.56–7.51 (m, 1H), 7.41–7.32 (m, 4H), 6.72–6.68 (m, 2H), 5.56 (s, 2H), 1.46 (s, 18H).

**<sup>13</sup>C{<sup>1</sup>H} NMR** (101 MHz, CD<sub>3</sub>OD, ppm) δ 145.7, 145.2, 144.3, 139.8, 137.7, 134.4, 133.7, 132.5, 131.3, 128.5, 125.5, 124.1, 117.8, 109.4, 63.4, 35.7, 32.4.

**HRMS** *m/z*: [M]<sup>+</sup> calculated for C<sub>32</sub>H<sub>35</sub>N<sub>2</sub><sup>+</sup>: 447.2800; Found: 447.2815.

**IR** (KBr,  $\text{cm}^{-1}$ ) 2957 (C–H).

### Synthesis of emitter **4b**

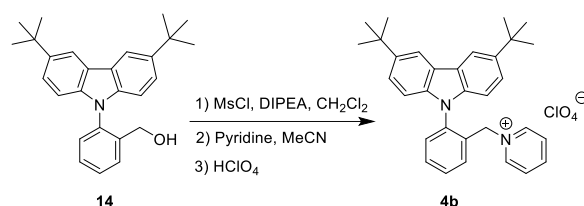

### 1-(2-(3,6-Di-*tert*-butyl-9H-carbazol-9-yl)benzyl)pyridin-1-ium perchlorate (**4b**).

Anhydrous  $\text{CH}_2\text{Cl}_2$  (30 mL) was added to (2-(3,6-di-*tert*-butyl-9H-carbazol-9-yl)phenyl)methanol (**14**, 0.4 g, 1.0 mmol, 1.0 equiv) in a 50 mL roundbottom flask at 0 °C. To the cooled colorless solution MsCl (0.2 mL, 2.0 mmol, 2.0 equiv) followed by DIPEA (0.7 mL, 4.0 mmol, 4.0 equiv) was added. The pale yellow solution was stirred in an ice bath. After 1h the reaction mixture was diluted with  $\text{CH}_2\text{Cl}_2$  (50 mL) and  $\text{H}_2\text{O}$  (50 mL), the layers separated and the water layer washed with  $\text{CH}_2\text{Cl}_2$  (30 mL) one more time. The combined organics were dried over  $\text{Na}_2\text{SO}_4$  and evaporated to give a yellow oil. MeCN (15 mL) was added to the yellow oil to form a yellow solution. Pyridine (0.8 mL, 9.9 mmol, 10 equiv) was added to the yellow solution and stirred at room temperature. After 72h the reaction mixture was directly subjected to reversed phase column chromatography using 0.1%  $\text{HClO}_4$  acidic water and MeCN as an eluent at a rate of 40 mL/min. Initial elution for 20 minutes with 5% MeCN followed by a 40 minute gradient from 5% to 95% MeCN afforded the desired material. After evaporation in *vacuo* the obtained oil was crystallized from  $\text{H}_2\text{O}$  (25 mL). The formed precipitate was filtered, washed with  $\text{H}_2\text{O}$  to give the product **4b** as a colorless solid (0.40 g, 73%). Analytically pure material was obtained by crystallization  $\text{H}_2\text{O}$ : mp 198–199 °C (colorless plates).

**$^1\text{H}$  NMR** (400 MHz,  $\text{CD}_3\text{OD}$ , ppm)  $\delta$  8.00–7.91 (m, 2H), 7.85–7.77 (m, 2H), 7.77–7.73 (m, 2H), 7.55–7.51 (m, 1H), 7.41–7.36 (m, 2H), 7.35–7.30 (m, 2H), 6.72–6.68 (m, 2H), 5.54 (s, 2H), 1.46 (s, 18H).

**$^{13}\text{C}\{^1\text{H}\}$  NMR** (101 MHz,  $\text{CD}_3\text{OD}$ , ppm)  $\delta$  145.7, 145.2, 144.2, 139.7, 137.7, 134.4, 134.3, 133.7, 132.5, 131.3, 128.5, 125.5, 124.1, 117.8, 109.4, 63.5, 35.7, 32.4.

**HRMS**  $m/z$ :  $[\text{M}]^+$  calculated for  $\text{C}_{32}\text{H}_{35}\text{N}_2^+$ : 447.2800; Found: 447.2802.

**IR** (KBr,  $\text{cm}^{-1}$ ) 2959 (C–H).

## Luminescence spectra

## Absorption in solution

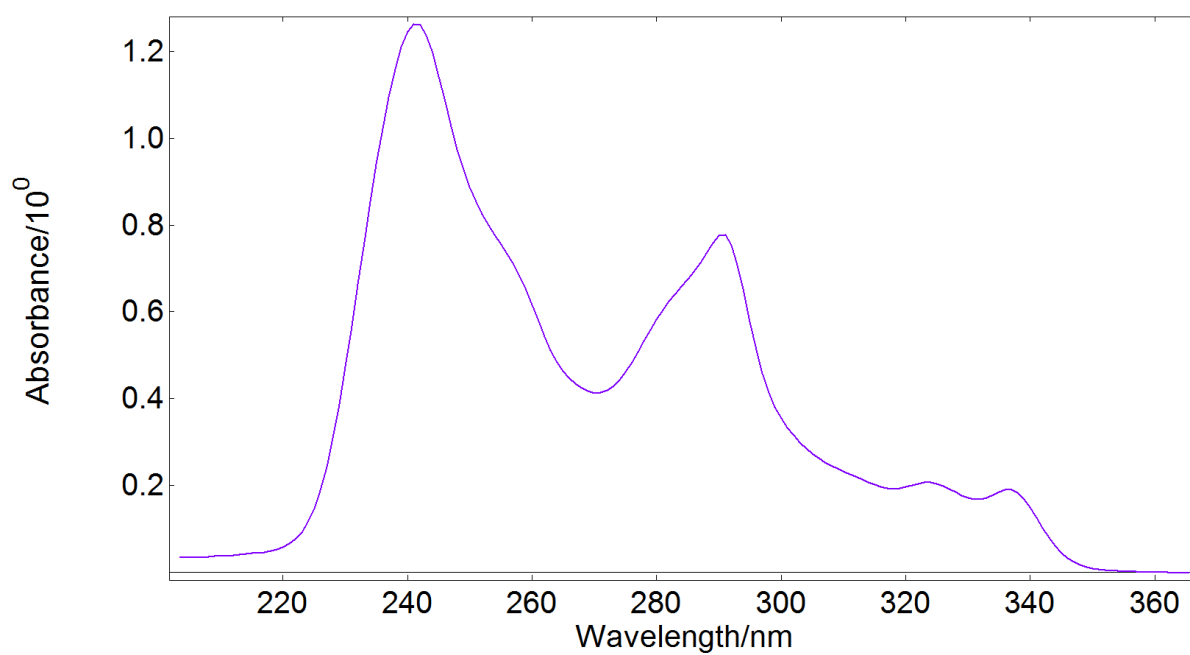

**Fig. S1.** Absorption of **1** in MeCN solution (at 10<sup>-5</sup> mol/L)

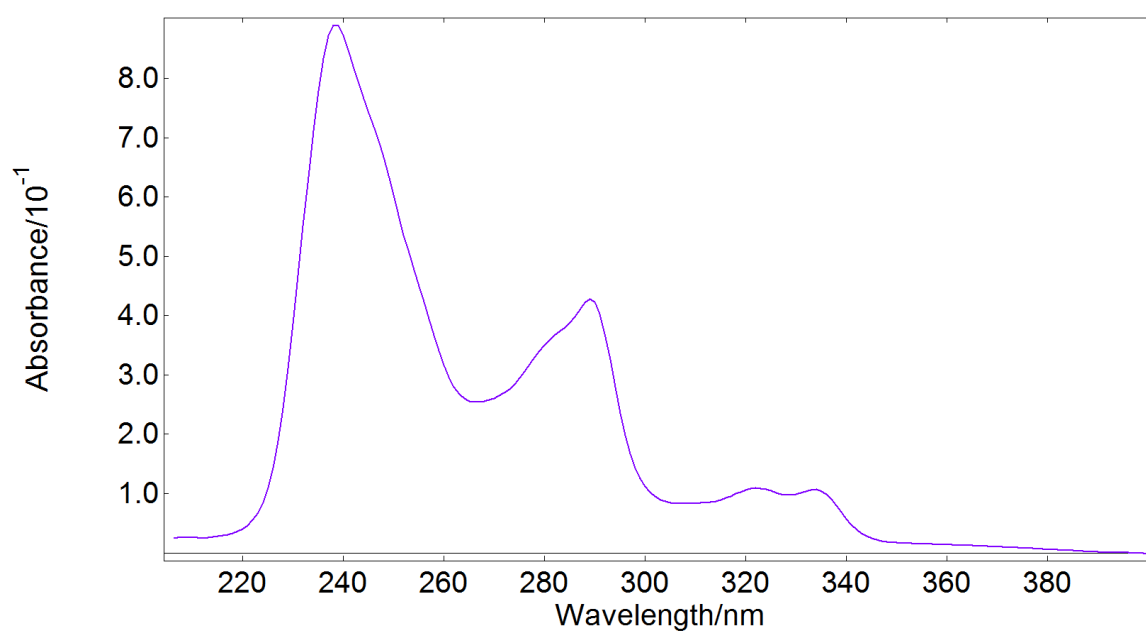

**Fig. S2.** Absorption of **2a** in MeCN solution (at 10<sup>-5</sup> mol/L)

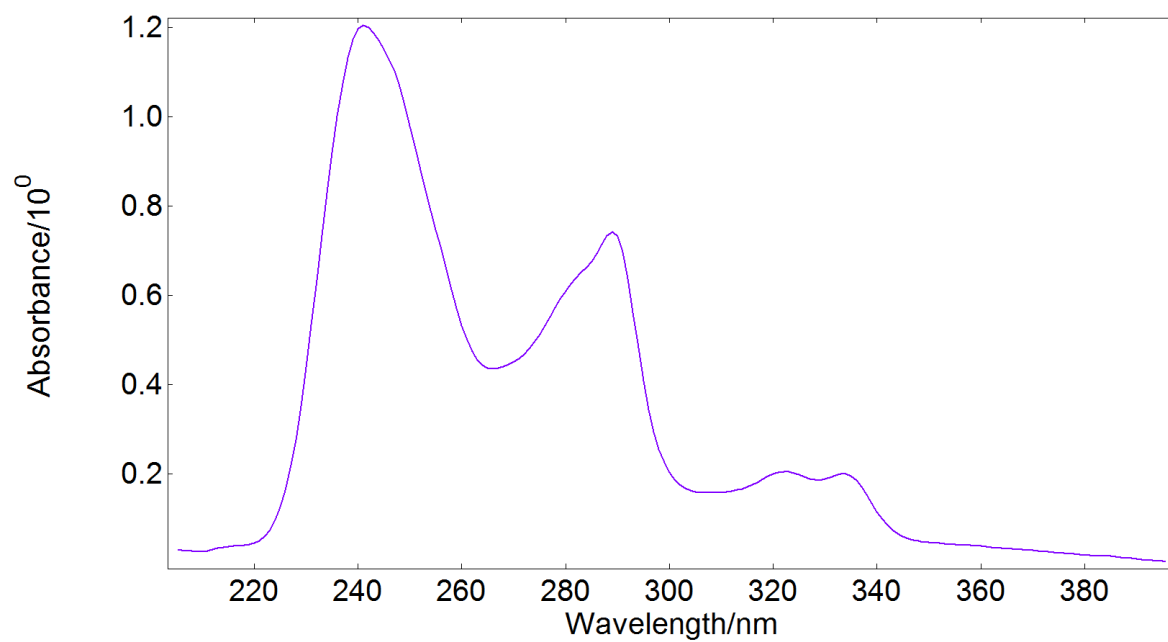

**Fig. S3.** Absorption of **2b** in MeCN solution (at  $10^{-5}$  mol/L)

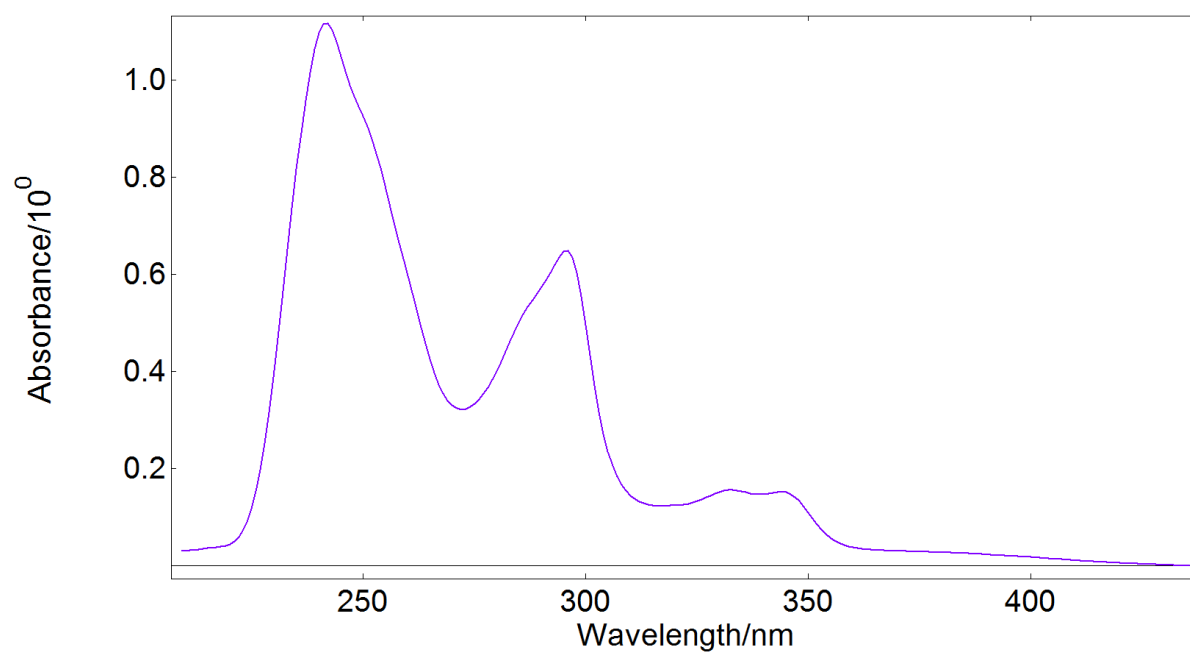

**Fig. S4.** Absorption of **3** in MeCN solution (at  $10^{-5}$  mol/L)

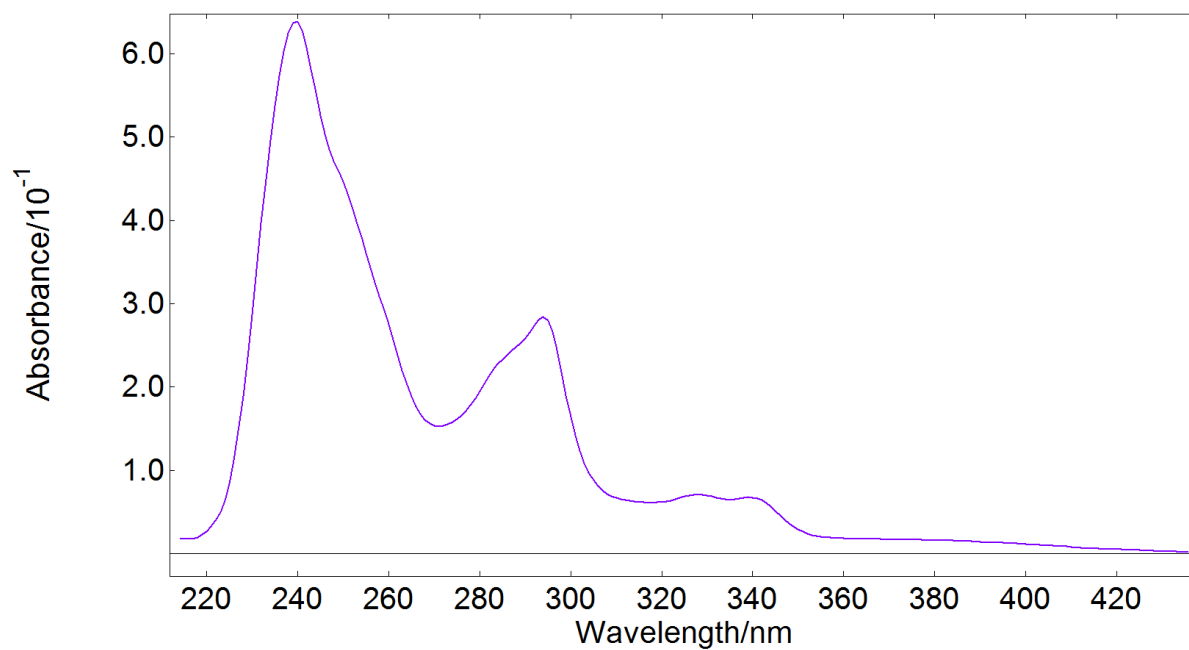

**Fig. S5.** Absorption of **4a** in MeCN solution (at  $10^{-5}$  mol/L)

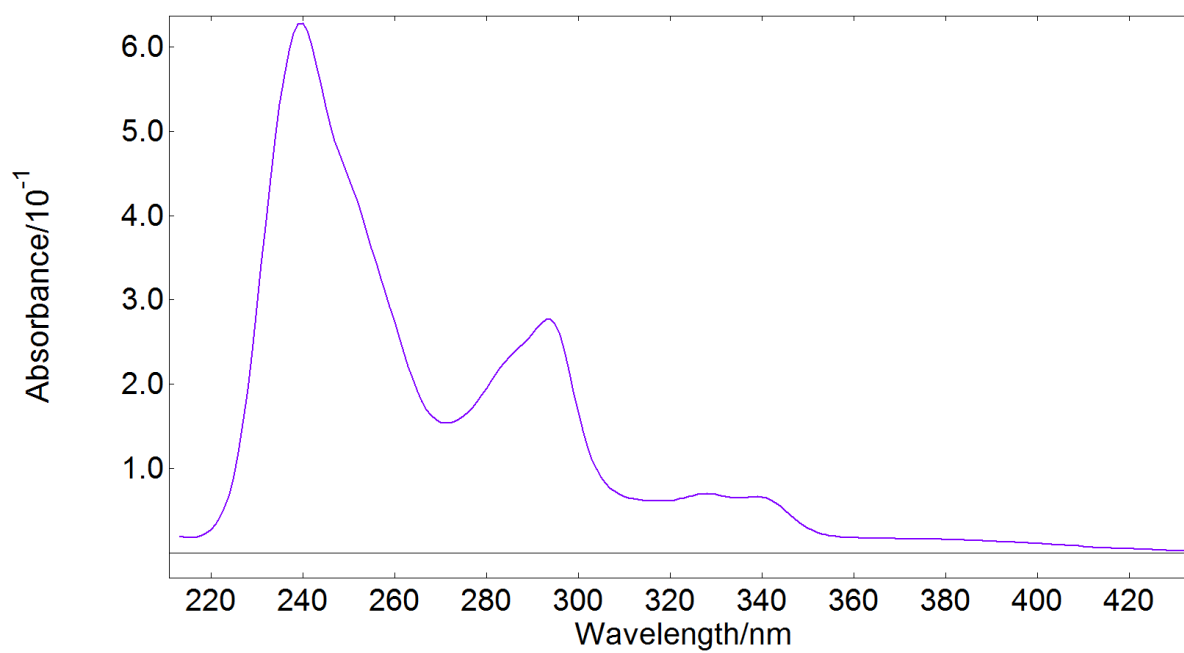

**Fig. S6.** Absorption of **4b** in MeCN solution (at  $10^{-5}$  mol/L)

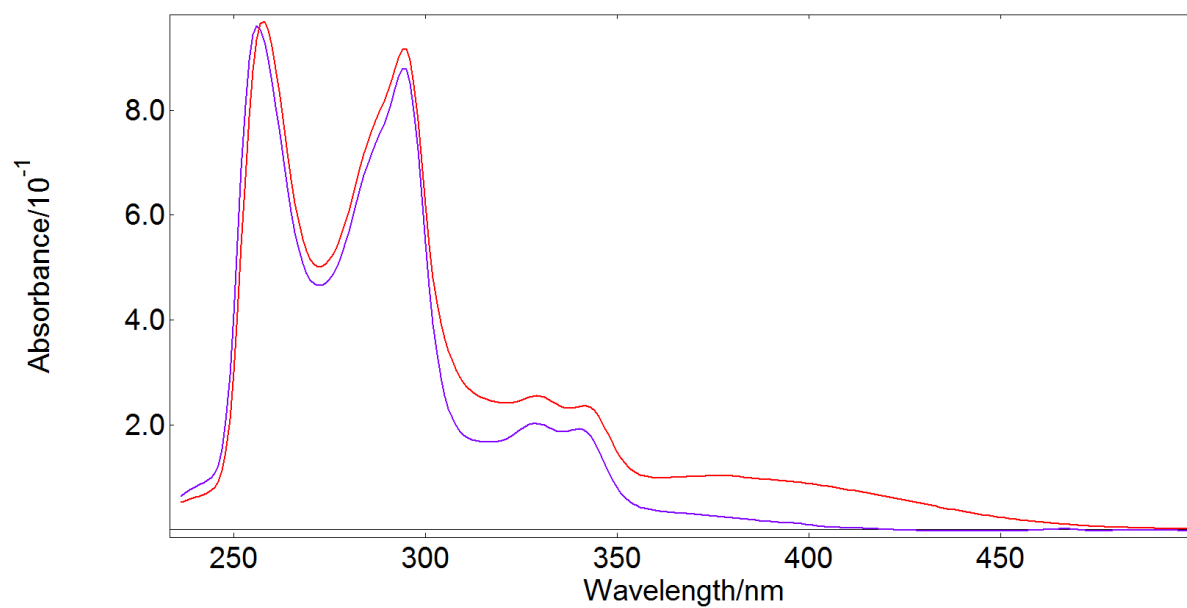

**Fig. S7.** Absorption of **4b** in EtOAc solution before (blue) and after (red) addition of 2 equivalents tetra-*n*-butylammonium iodide (at  $10^{-5}$  mol/L)

#### Emission in MeCN solution

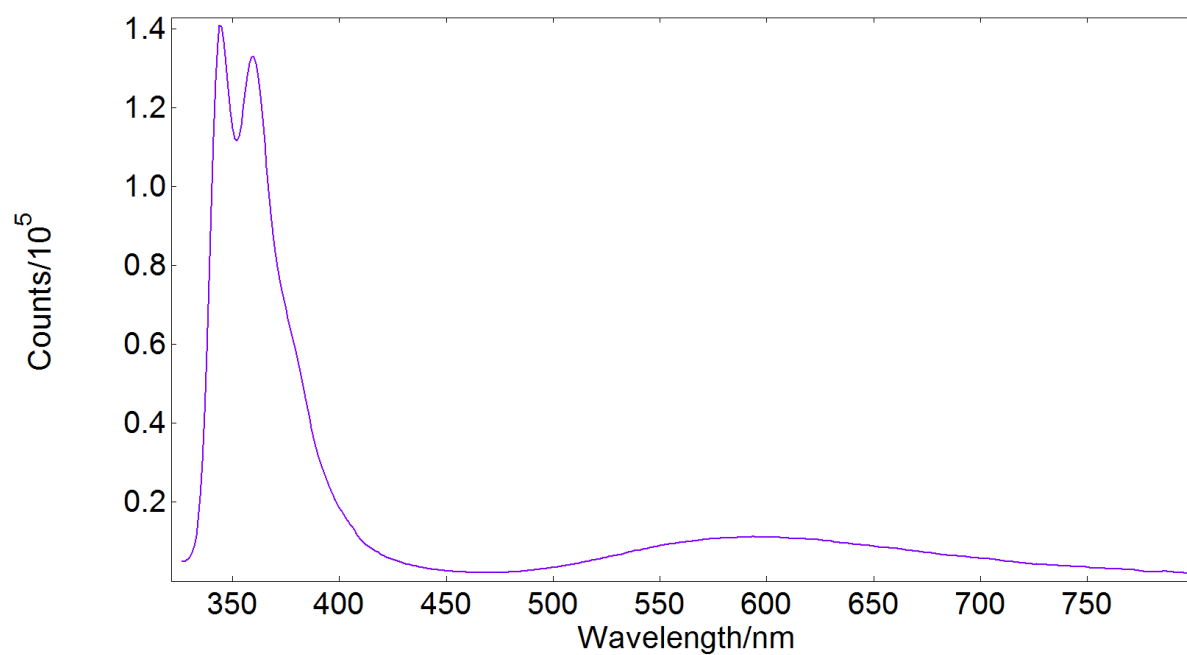

**Fig. S8.** Emission of **2a** in MeCN solution (at  $10^{-5}$  mol/L)

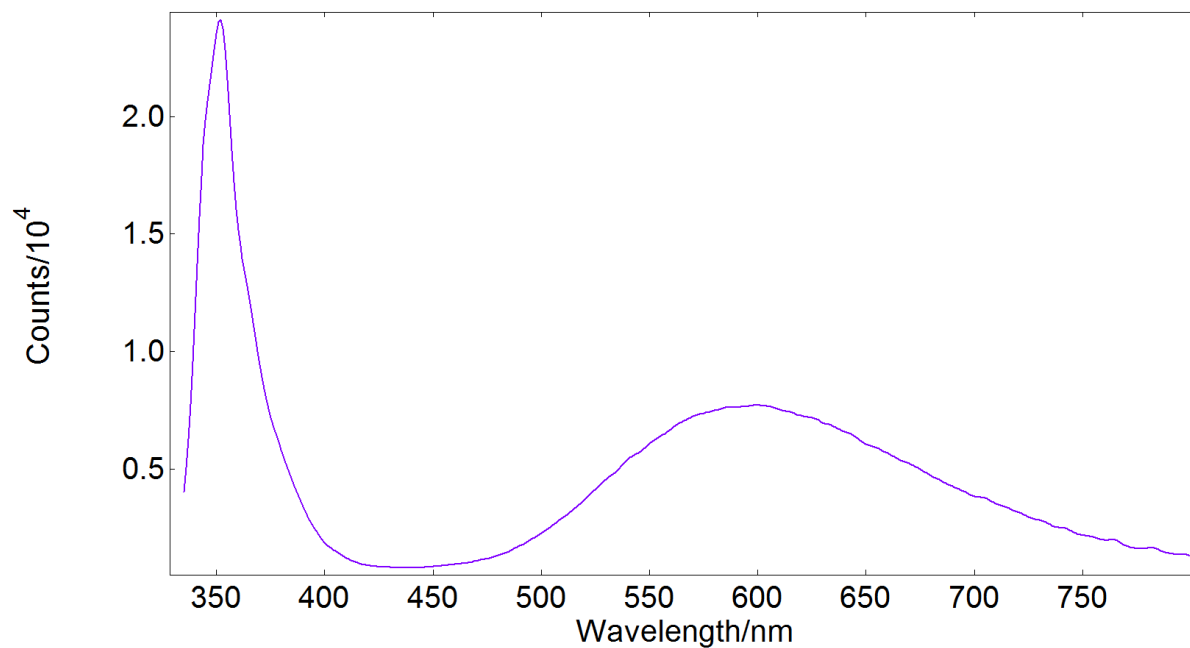

**Fig. S9.** Emission of **2b** in MeCN solution (at  $10^{-5}$  mol/L)

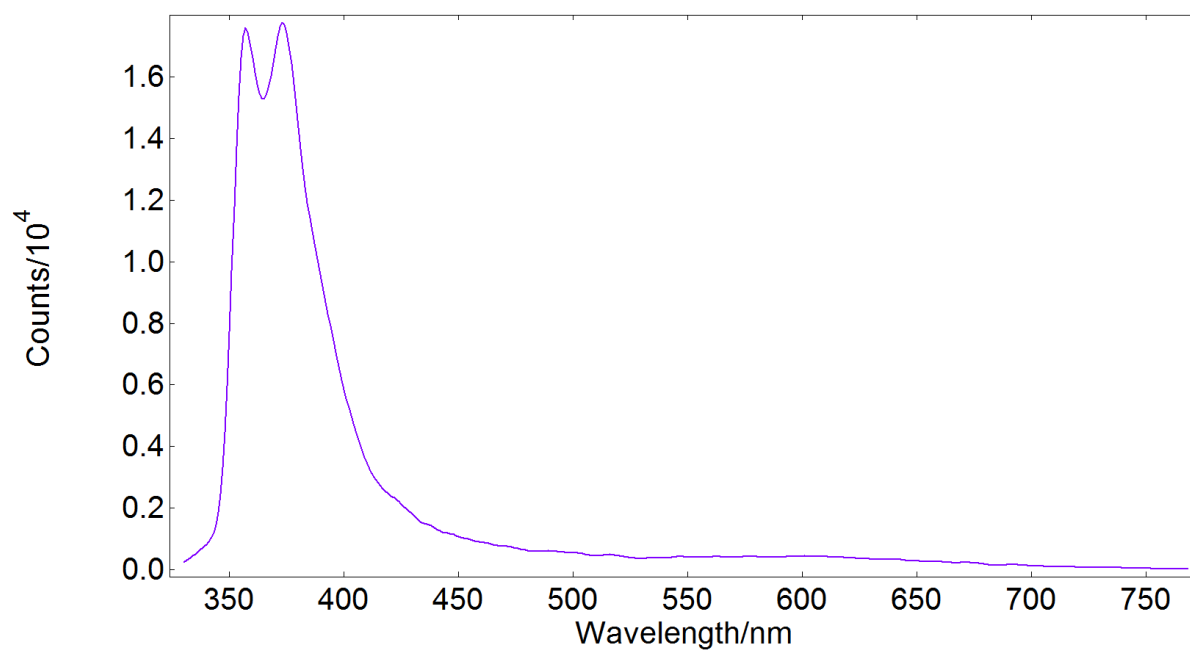

**Fig. S10.** Emission of **3** in MeCN solution (at  $10^{-5}$  mol/L)

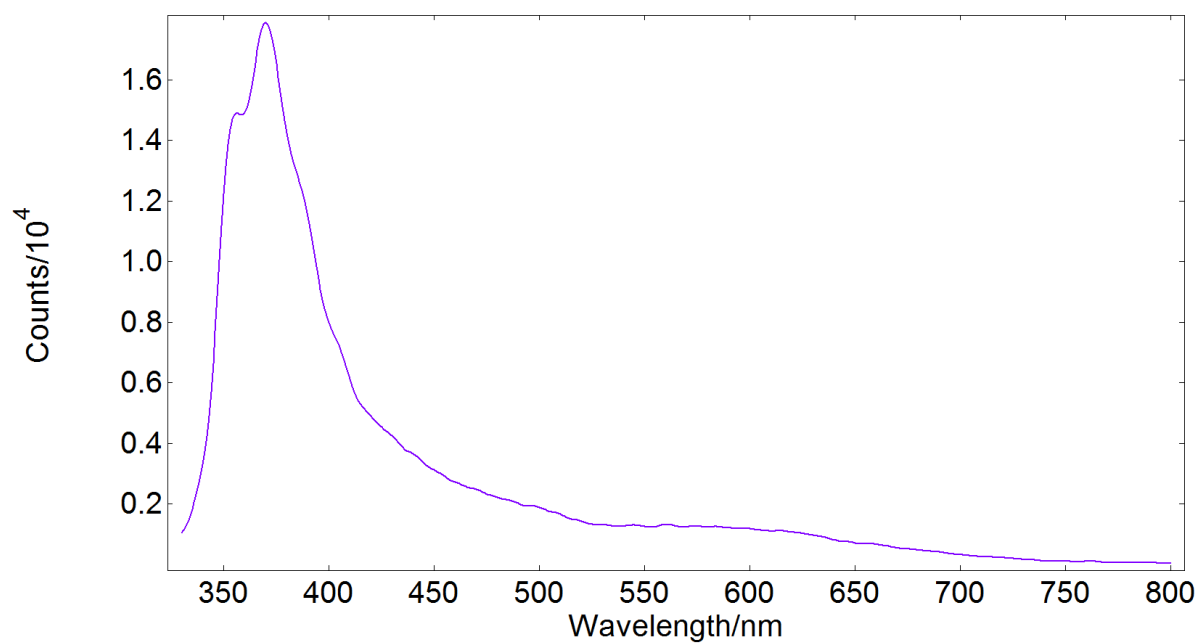

**Fig. S11.** Emission of **4a** in MeCN solution (at  $10^{-5}$  mol/L)

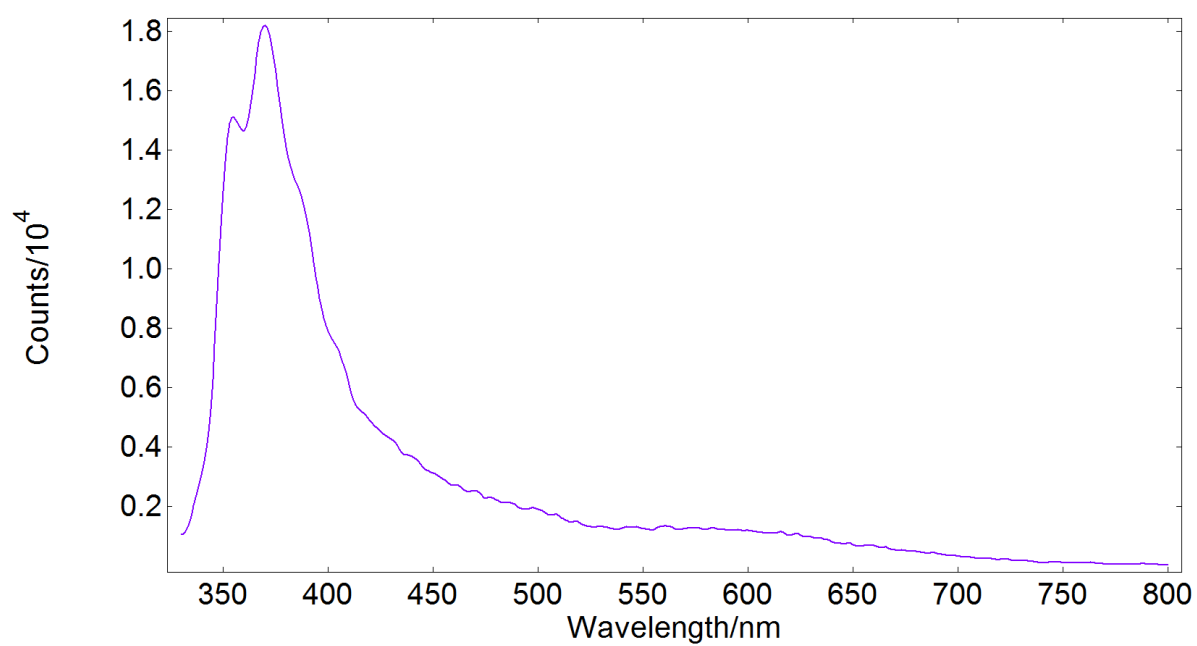

**Fig. S12.** Emission of **4b** in MeCN solution (at  $10^{-5}$  mol/L)



**Emission in the solid state**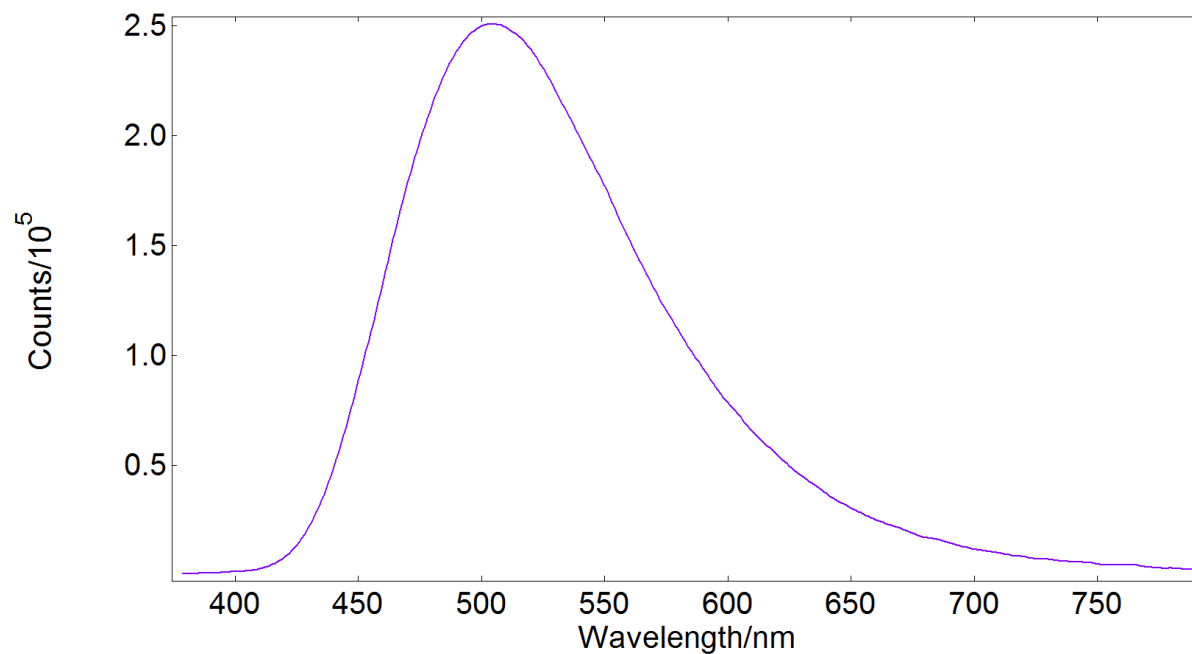**Fig. S13.** Emission of **1** in the solid state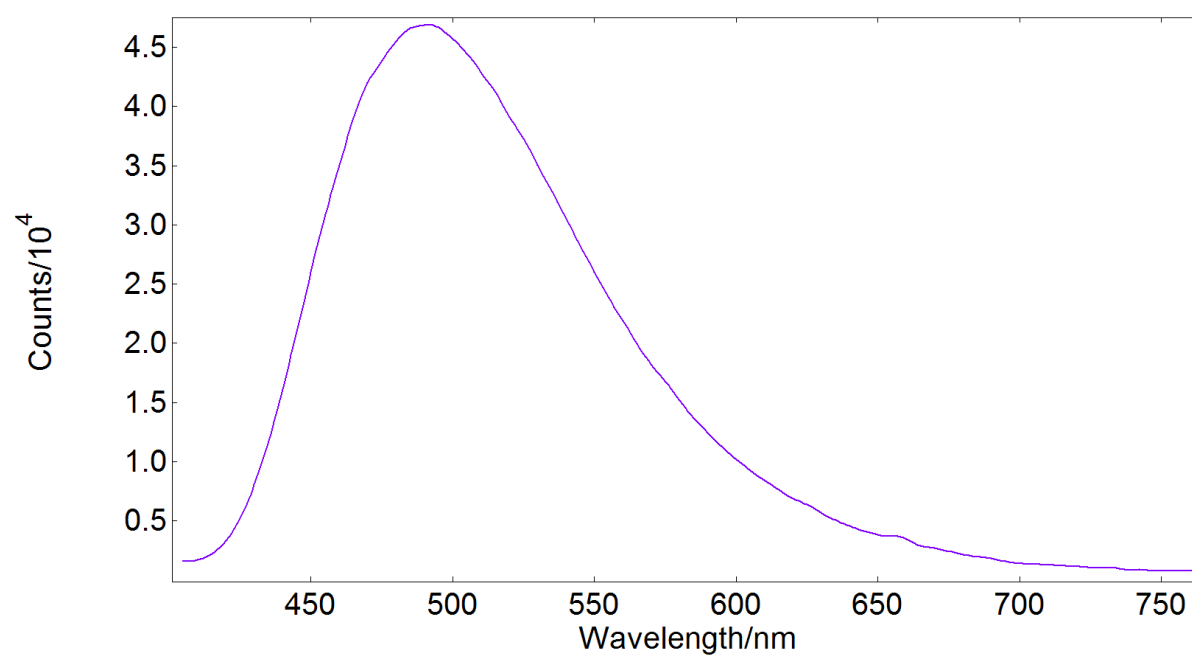**Fig. S14.** Emission of **2a** in the solid state

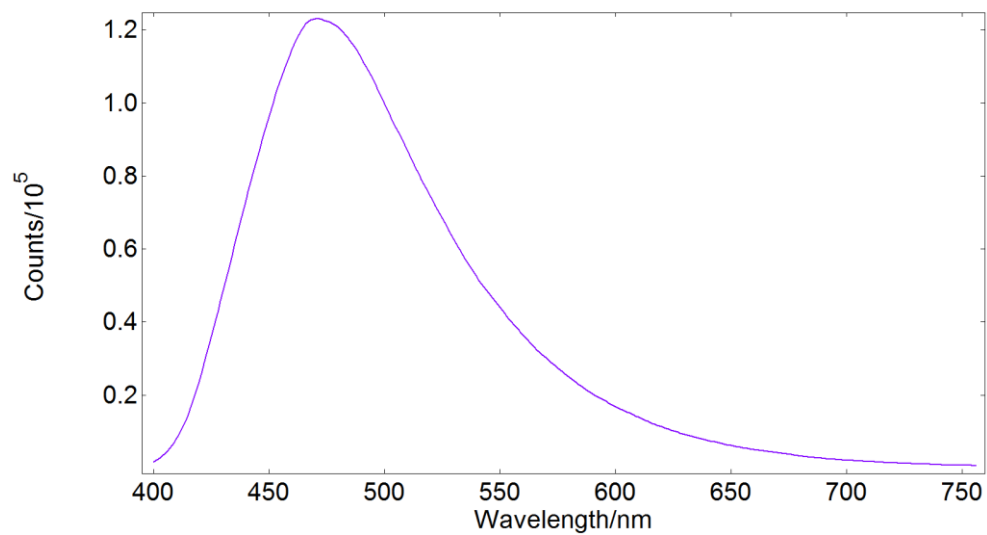

**Fig. S15.** Emission of **2b** in the solid state

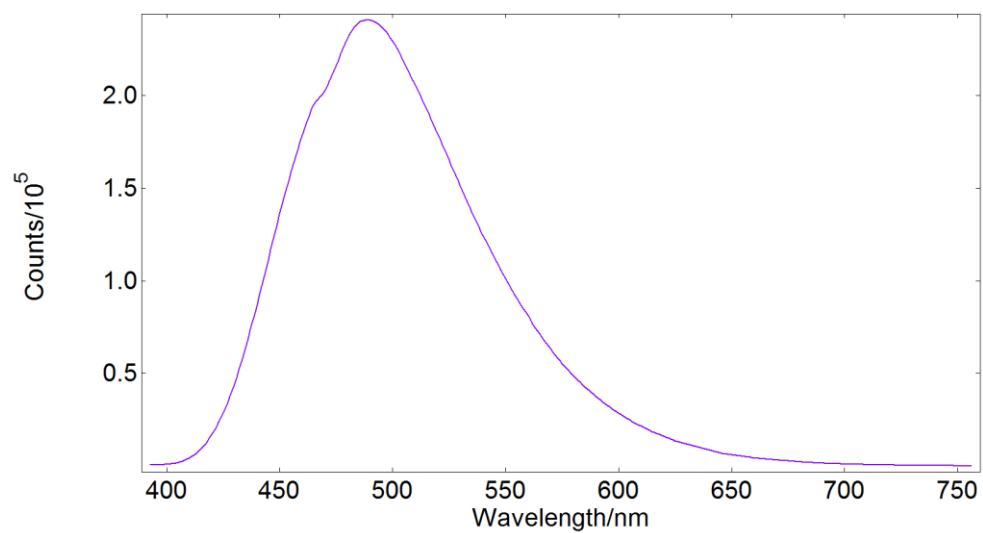

**Fig. S16.** Emission of **3** in the solid state

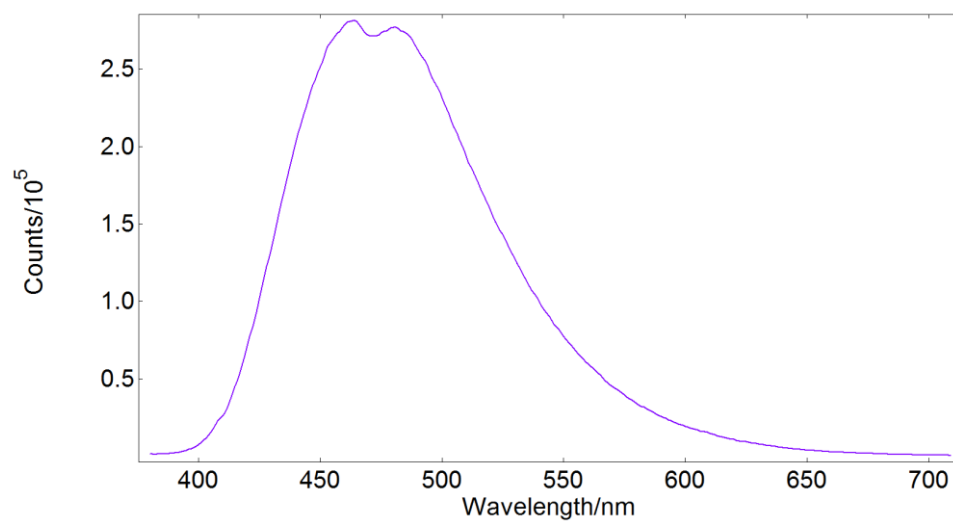

**Fig. S17.** Emission of **4a** in the solid state

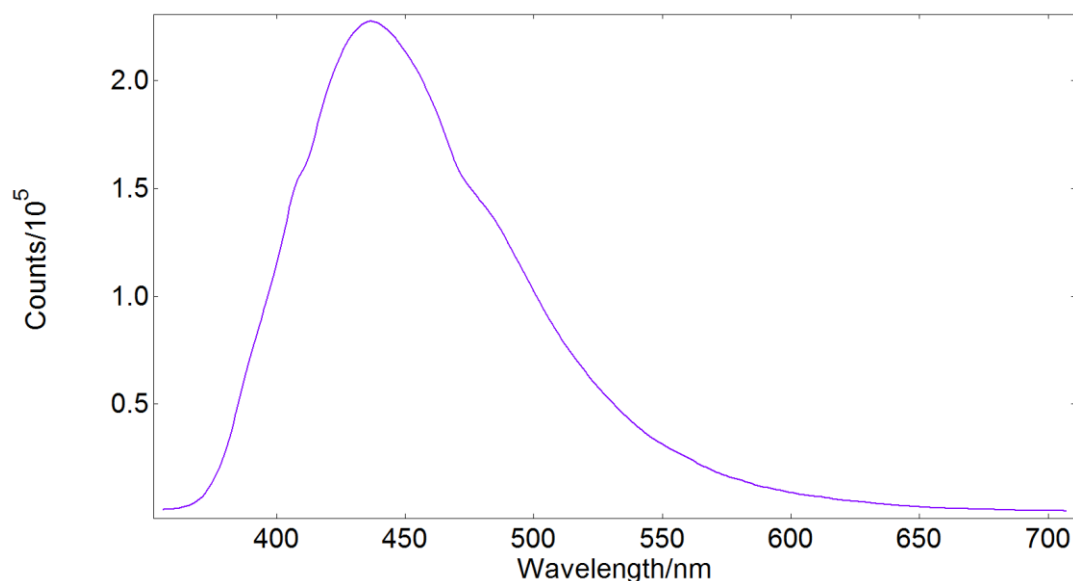

**Fig. S18.** Emission of **4b** in the solid state

In repeated measurements under the same experimental conditions (excitation source, wavelength, batch of the material, experimental setup) the  $\Phi$  values of solid state luminophores **1–4** did not differ by more than 2% of the  $\Phi$  value given in Table 1 (see manuscript). Accordingly, four repeated measurements for each compound were conducted (see below). The standard deviation ( $\sigma$ ) for the measurements is within the expected range and would be fully obscured by the marker of each point in Figure 4C (see manuscript).

**Table S1.** Repeated measurements of solid state  $\Phi$  for compounds **1–4**.

| Compound  | $\Phi_1$ , % | $\Phi_2$ , % | $\Phi_3$ , % | $\Phi_4$ , % | $\sigma$ , % |
|-----------|--------------|--------------|--------------|--------------|--------------|
| <b>1</b>  | 16.9         | 17.2         | 17.1         | 17.7         | 0.3          |
| <b>2a</b> | 43.0         | 42.6         | 44.9         | 43.3         | 1.0          |
| <b>2b</b> | 34.9         | 34.3         | 35.8         | 35.1         | 0.6          |
| <b>3</b>  | 83.6         | 87.0         | 84.9         | 85.2         | 1.4          |
| <b>4a</b> | 42.8         | 41.7         | 43.3         | 41.4         | 0.9          |
| <b>4b</b> | 18.5         | 19.7         | 18.8         | 19.3         | 0.5          |

**X-Ray Structure, crystal data and structure refinements for 2a**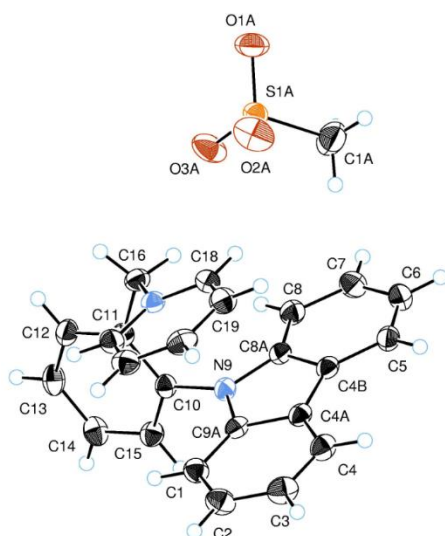

|                                                              |                                                                              |
|--------------------------------------------------------------|------------------------------------------------------------------------------|
| Identification code                                          | KL-1291                                                                      |
| Empirical formula                                            | C <sub>25</sub> H <sub>22</sub> N <sub>2</sub> O <sub>3</sub> S              |
| Formula weight                                               | 430.53                                                                       |
| Temperature/K                                                | 150.0(1)                                                                     |
| Crystal system                                               | monoclinic                                                                   |
| Space group                                                  | <i>P</i> 2 <sub>1</sub> / <i>c</i>                                           |
| <i>a</i> /Å                                                  | 14.9750(1)                                                                   |
| <i>b</i> /Å                                                  | 19.7881(1)                                                                   |
| <i>c</i> /Å                                                  | 14.8102(1)                                                                   |
| $\alpha$ /°                                                  | 90                                                                           |
| $\beta$ /°                                                   | 108.774(1)                                                                   |
| $\gamma$ /°                                                  | 90                                                                           |
| Volume/Å <sup>3</sup>                                        | 4155.16(5)                                                                   |
| <i>Z</i>                                                     | 8                                                                            |
| $\rho_{\text{calc}}$ /g/cm <sup>3</sup>                      | 1.3763                                                                       |
| $\mu$ /mm <sup>-1</sup>                                      | 1.635                                                                        |
| <i>F</i> (000)                                               | 1808                                                                         |
| Crystal size/mm <sup>3</sup>                                 | 0.22 × 0.13 × 0.02                                                           |
| Radiation                                                    | Cu K $\alpha$ ( $\lambda$ = 1.54184)                                         |
| 2 $\theta$ max. for data collection/°                        | 155.0                                                                        |
| Index ranges                                                 | -18 ≤ <i>h</i> ≤ 18, -25 ≤ <i>k</i> ≤ 24, -18 ≤ <i>l</i> ≤ 17                |
| Reflections collected                                        | 63395                                                                        |
| Independent reflections                                      | 8742 [ <i>R</i> <sub>int</sub> = 0.0391, <i>R</i> <sub>sigma</sub> = 0.0231] |
| Data/restraints/parameters                                   | 8742/0/561                                                                   |
| Goodness-of-fit on <i>F</i> <sup>2</sup>                     | 1.049                                                                        |
| Final <i>R</i> indexes [ <i>I</i> ≥ 2 $\sigma$ ( <i>I</i> )] | <i>R</i> <sub>1</sub> = 0.0378, <i>wR</i> <sub>2</sub> = 0.1005              |
| Largest diff. peak/hole / e Å <sup>-3</sup>                  | 0.38/-0.48                                                                   |

**X-Ray Structure, crystal data and structure refinements for 2b**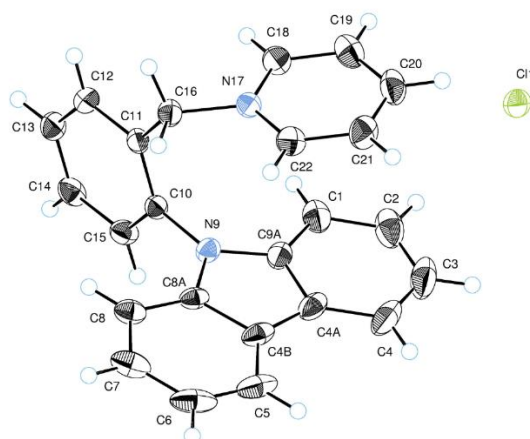

|                                                              |                                                                 |
|--------------------------------------------------------------|-----------------------------------------------------------------|
| Identification code                                          | KL1321                                                          |
| Empirical formula                                            | C <sub>24</sub> H <sub>19</sub> ClN <sub>2</sub>                |
| Formula weight                                               | 370.86                                                          |
| Temperature/K                                                | 150.0(1)                                                        |
| Crystal system                                               | monoclinic                                                      |
| Space group                                                  | <i>P</i> 2 <sub>1</sub> / <i>c</i>                              |
| <i>a</i> /Å                                                  | 8.90415(9)                                                      |
| <i>b</i> /Å                                                  | 28.9401(2)                                                      |
| <i>c</i> /Å                                                  | 7.98398(8)                                                      |
| $\alpha$ /°                                                  | 90                                                              |
| $\beta$ /°                                                   | 111.1157(11)                                                    |
| $\gamma$ /°                                                  | 90                                                              |
| Volume/Å <sup>3</sup>                                        | 1919.22(3)                                                      |
| <i>Z</i>                                                     | 4                                                               |
| $\rho_{\text{calc}}$ /g/cm <sup>3</sup>                      | 1.283                                                           |
| $\mu$ /mm <sup>-1</sup>                                      | 1.825                                                           |
| Crystal size/mm <sup>3</sup>                                 | 0.21×0.17×0.06                                                  |
| Radiation                                                    | CuK $\alpha$ ( $\lambda$ = 1.54184)                             |
| 2 $\theta$ max. for data collection/°                        | 155.0                                                           |
| Reflections collected                                        | 24065                                                           |
| Independent reflections                                      | 4073                                                            |
| Restraints/parameters                                        | 0/245                                                           |
| Goodness-of-fit on <i>F</i> <sup>2</sup>                     | 1.054                                                           |
| Final <i>R</i> indexes [ <i>I</i> > 2 $\sigma$ ( <i>I</i> )] | <i>R</i> <sub>1</sub> = 0.0335, <i>wR</i> <sub>2</sub> = 0.0876 |
| Final <i>R</i> indexes [all data]                            | <i>R</i> <sub>1</sub> = 0.0341, <i>wR</i> <sub>2</sub> = 0.0880 |
| Largest diff. peak/hole / e Å <sup>-3</sup>                  | 0.26/-0.23                                                      |

**X-Ray Structure, crystal data and structure refinements for 3**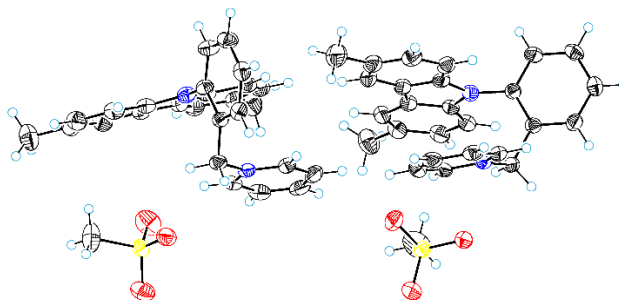

|                                               |                                                                              |
|-----------------------------------------------|------------------------------------------------------------------------------|
| Identification code                           | KL-1421A                                                                     |
| Empirical formula                             | C <sub>54</sub> H <sub>52</sub> N <sub>4</sub> O <sub>6</sub> S <sub>2</sub> |
| Formula weight                                | 917.17                                                                       |
| Temperature/K                                 | 150.0(3)                                                                     |
| Crystal system                                | triclinic                                                                    |
| Space group                                   | $P \bar{1}$                                                                  |
| $a/\text{\AA}$                                | 13.3101(3)                                                                   |
| $b/\text{\AA}$                                | 13.4723(5)                                                                   |
| $c/\text{\AA}$                                | 13.9252(3)                                                                   |
| $\alpha/^\circ$                               | 101.733(3)                                                                   |
| $\beta/^\circ$                                | 102.111(2)                                                                   |
| $\gamma/^\circ$                               | 100.527(3)                                                                   |
| Volume/ $\text{\AA}^3$                        | 2323.25(12)                                                                  |
| $Z$                                           | 2                                                                            |
| $\rho_{\text{calc}}/\text{g cm}^{-3}$         | 1.3110                                                                       |
| $\mu/\text{mm}^{-1}$                          | 1.493                                                                        |
| Crystal size/ $\text{mm}^3$                   | $0.19 \times 0.06 \times 0.01$                                               |
| Radiation                                     | CuK $\alpha$ ( $\lambda = 1.54184$ )                                         |
| $2\theta$ max. for data collection/ $^\circ$  | 160.0                                                                        |
| Reflections collected                         | 12221                                                                        |
| Independent reflections                       | 9928                                                                         |
| Restraints/parameters                         | 0/601                                                                        |
| Goodness-of-fit on $F^2$                      | 1.196                                                                        |
| Final $R$ indexes [ $I > 2\sigma(I)$ ]        | $R_1 = 0.0953$ , $wR_2 = 0.2903$                                             |
| Final $R$ indexes [all data]                  | $R_1 = 0.1046$ , $wR_2 = 0.2957$                                             |
| Largest diff. peak/hole / $\text{e \AA}^{-3}$ | 1.97/-0.70                                                                   |

**X-Ray Structure, crystal data and structure refinements for 4a**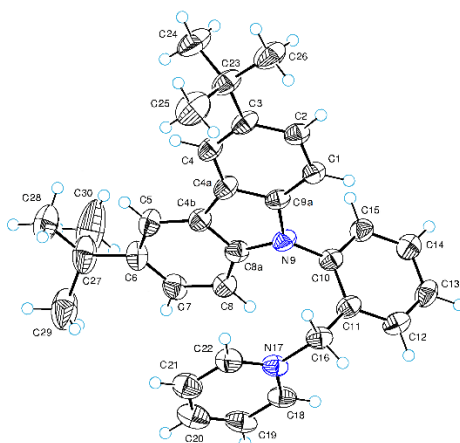

|                                               |                                            |
|-----------------------------------------------|--------------------------------------------|
| Identification code                           | k11418                                     |
| Empirical formula                             | $C_{64}H_{70}Cl_2N_4$                      |
| Formula weight                                | 966.14                                     |
| Temperature/K                                 | 150.0(2)                                   |
| Crystal system                                | monoclinic                                 |
| Space group                                   | $P2_1/n$                                   |
| $a/\text{\AA}$                                | 10.2702(7)                                 |
| $b/\text{\AA}$                                | 12.6758(9)                                 |
| $c/\text{\AA}$                                | 41.470(3)                                  |
| $\alpha/^\circ$                               | 90                                         |
| $\beta/^\circ$                                | 90.17(1)                                   |
| $\gamma/^\circ$                               | 90                                         |
| Volume/ $\text{\AA}^3$                        | 5398.7(7)                                  |
| $Z$                                           | 4                                          |
| $\rho_{\text{calc}}/\text{g cm}^{-3}$         | 1.189                                      |
| $\mu/\text{mm}^{-1}$                          | 1.406                                      |
| Crystal size/ $\text{mm}^3$                   | $0.22 \times 0.12 \times 0.03$             |
| Radiation                                     | $\text{CuK}\alpha$ ( $\lambda = 1.54184$ ) |
| $2\theta$ max. for data collection/ $^\circ$  | 160.0                                      |
| Reflections collected                         | 15044                                      |
| Independent reflections                       | 10487                                      |
| Restraints/parameters                         | 0/655                                      |
| Goodness-of-fit on $F^2$                      | 1.110                                      |
| Final $R$ indexes [ $I > 2\sigma(I)$ ]        | $R_1 = 0.1247$ , $wR_2 = 0.3594$           |
| Final $R$ indexes [all data]                  | $R_1 = 0.1406$ , $wR_2 = 0.3701$           |
| Largest diff. peak/hole / $e \text{\AA}^{-3}$ | 1.39/-0.54                                 |

**X-Ray Structure, crystal data and structure refinements for 4b**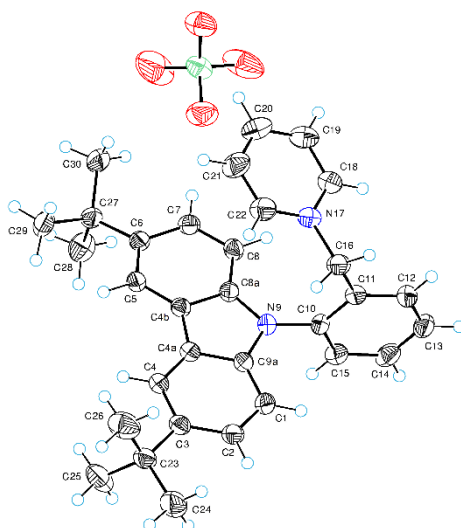

|                                             |                                                                 |
|---------------------------------------------|-----------------------------------------------------------------|
| Identification code                         | C1418                                                           |
| Empirical formula                           | C <sub>32</sub> H <sub>35</sub> ClN <sub>2</sub> O <sub>4</sub> |
| Formula weight                              | 547.10                                                          |
| Temperature/K                               | 150.0(1)                                                        |
| Crystal system                              | orthorhombic                                                    |
| Space group                                 | <i>Pbca</i>                                                     |
| <i>a</i> /Å                                 | 12.1430(4)                                                      |
| <i>b</i> /Å                                 | 11.0905(4)                                                      |
| <i>c</i> /Å                                 | 42.6477(15)                                                     |
| $\alpha$ /°                                 | 90                                                              |
| $\beta$ /°                                  | 90                                                              |
| $\gamma$ /°                                 | 90                                                              |
| Volume/Å <sup>3</sup>                       | 5743.4(4)                                                       |
| <i>Z</i>                                    | 8                                                               |
| $\rho_{\text{calc}}$ /cm <sup>3</sup>       | 1.2653                                                          |
| $\mu$ /mm <sup>-1</sup>                     | 1.491                                                           |
| Crystal size/mm <sup>3</sup>                | 0.17 × 0.16 × 0.01                                              |
| Radiation                                   | Cu K $\alpha$ ( $\lambda$ = 1.54184 Å)                          |
| 2 $\theta$ max. for data collection/°       | 160.0                                                           |
| Reflections collected                       | 30498                                                           |
| Independent reflections                     | 6185                                                            |
| Restraints/parameters                       | 0/358                                                           |
| Goodness-of-fit on $F^2$                    | 1.060                                                           |
| Final <i>R</i> indexes [ $I > 2\sigma(I)$ ] | $R_1 = 0.0664$ , $wR_2 = 0.1566$                                |
| Final <i>R</i> indexes [all data]           | $R_1 = 0.0859$ , $wR_2 = 0.1670$                                |
| Largest diff. peak/hole / e Å <sup>-3</sup> | 0.55/-0.45                                                      |



**Quantum chemical calculations****Charge transfer integral calculations****Every considered charge transfer (CT) pathway for 1–4**

Geometries of the molecules were obtained from the X-Ray analysis data.

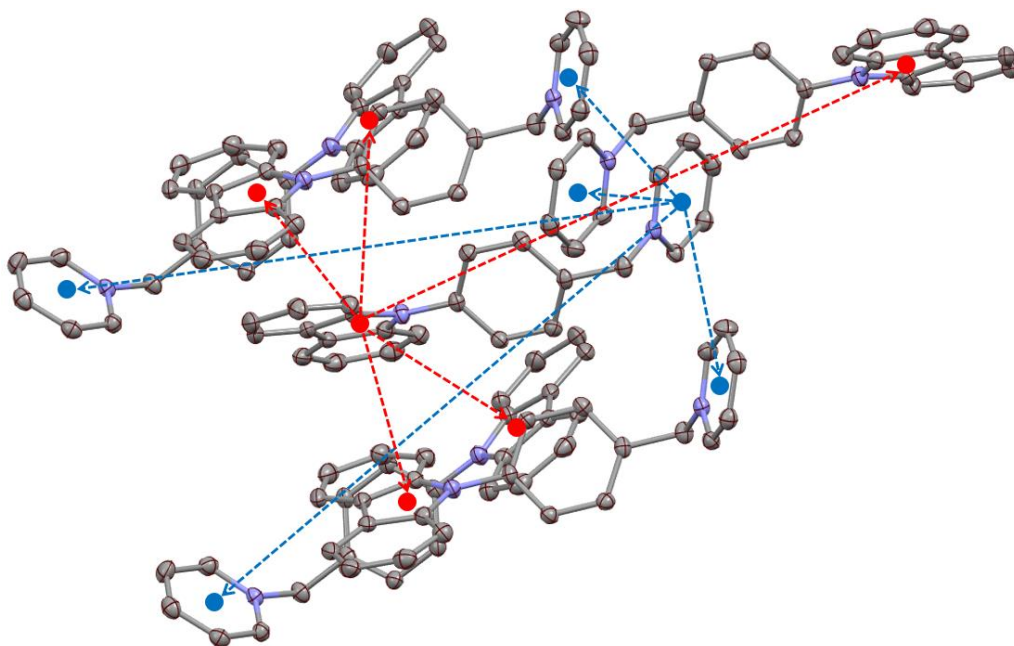

**Fig. S19.** Every electron (blue vectors) and hole (red vectors) CT pathway considered for **1**

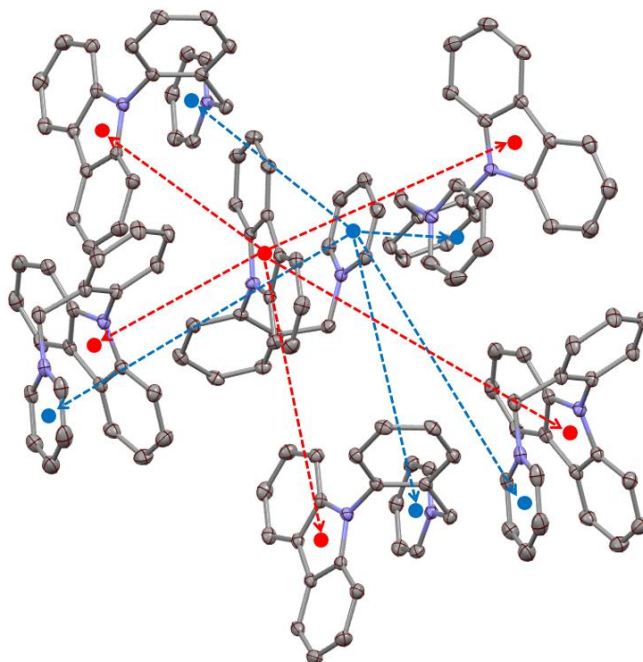

**Fig. S20.** Every electron (blue vectors) and hole (red vectors) CT pathway considered for **2a**

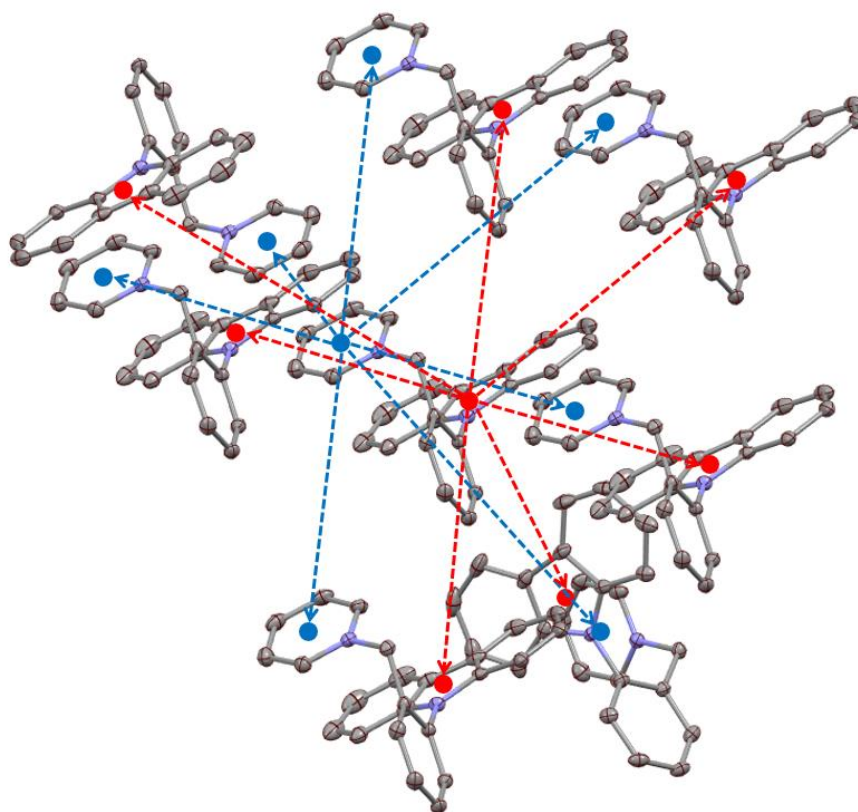

**Fig. S21.** Every electron (blue vectors) and hole (red vectors) CT pathway considered for **2b**

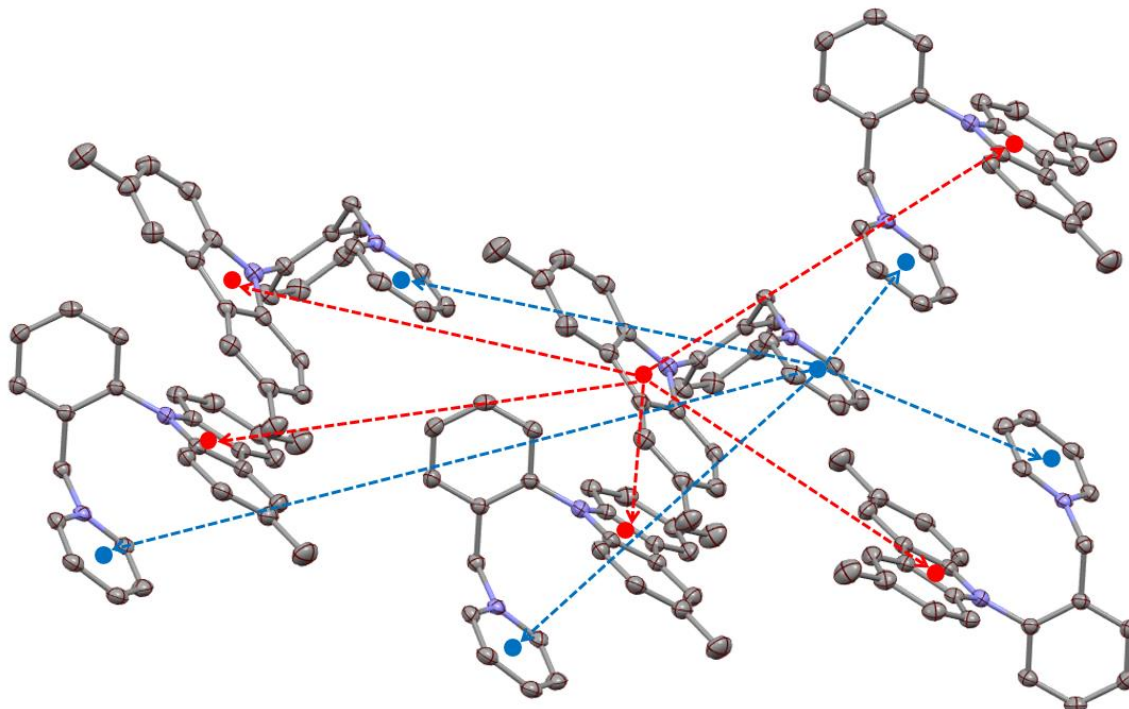

**Fig. S22.** Every electron (blue vectors) and hole (red vectors) CT pathway considered for **3**

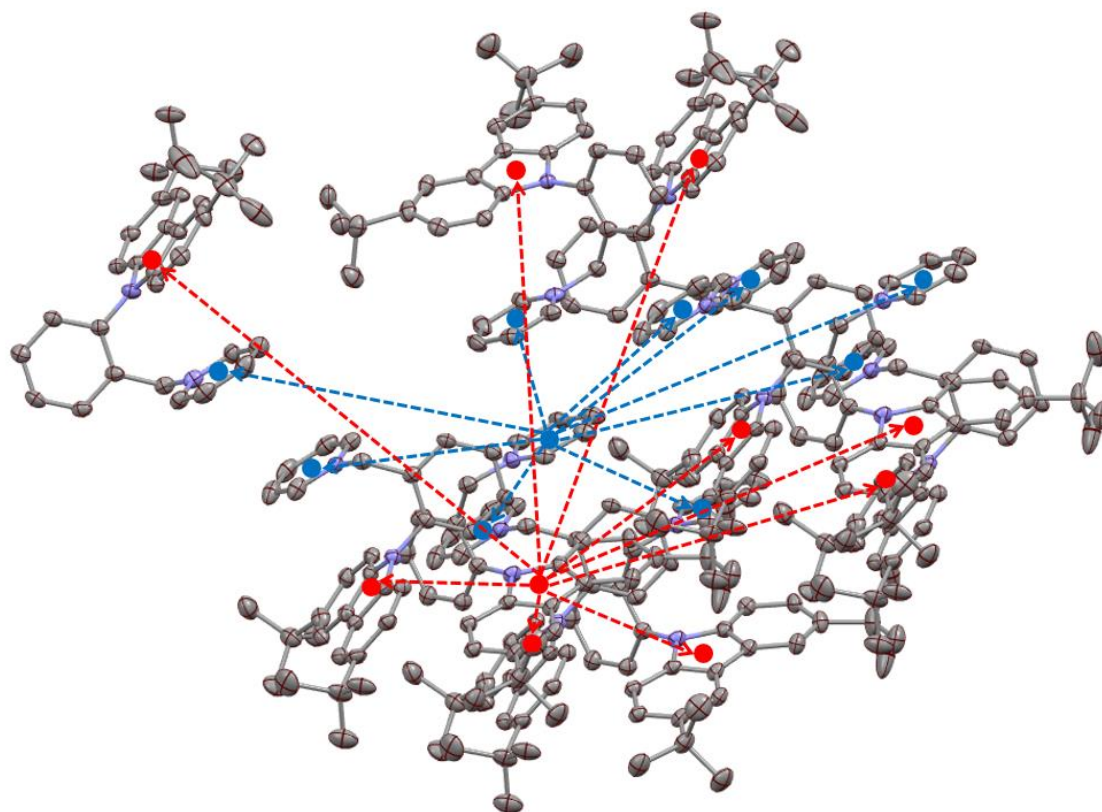

**Fig. S23.** Every electron (blue vectors) and hole (red vectors) CT pathway considered for **4a**

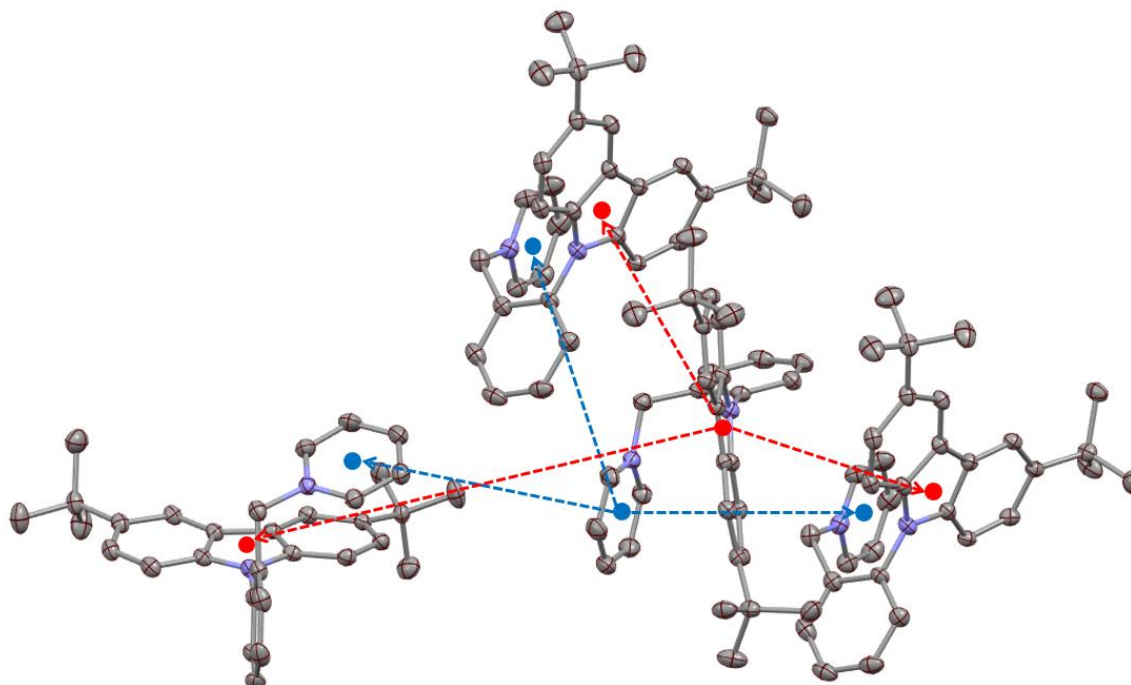

**Fig. S24.** Every electron (blue vectors) and hole (red vectors) CT pathway considered for **4b**

**Calculation methodology for electronic coupling:**

Luminophore molecules in their corresponding geometries were obtained from the X-ray analysis data. The geometries of dimers were obtained by selecting short contacts from X-ray analysis data. Only unique geometries of the short contact pairs were used in further calculations without additional geometry optimization. For each pair of the dimers HOMO and LUMO data of dimer and individual monomers were calculated. CTIs were calculated for both electron transfer (LUMO, blue vectors,  $E_{1-3}$ ) and hole transfer (HOMO, red vectors,  $H_{1-3}$ ) using CATNIP (Brown, J. S. Catnip (version 1.9), **2018** software. (Available from [https://github.com/JoshuaSBrown/QC\\_Tools](https://github.com/JoshuaSBrown/QC_Tools)) For all CT pathways in compounds **1–4** the absolute value of electronic coupling ( $|V|$ ) was calculated using dimers of the corresponding compound. Their absolute hole (HOMO-HOMO) and electron (LUMO-LUMO) coupling values were calculated using formula:

$$|V| = \left| \frac{J - S(\varepsilon_1 + \varepsilon_2)}{1 - S^2} \right|,$$

where

$J$  – charge transfer integral;  $\varepsilon_1$  – site energy for 1st luminophore of the chosen dimer;  $\varepsilon_2$  – site energy for 2nd luminophore for the chosen dimer;  $S$  – overlap integral.

The calculations for HOMOs and LUMOs were performed using Gaussian 09<sup>3</sup> software using B3LYP/6-311++g(2df,p) level of theory. The use of CAM-B3LYP/6-311++g(2df,p) basis set afforded similar results.

Hardware for calculations: the cluster for calculations consisted of: 2x Intel Xeon E5-2630 v2 (6 cores)/64 GB RAM/2x Nvidia Tesla K20M nodes. The calculations were performed on 10 cores with 50 GB RAM. The longest CPU time for a single dimer was 2d 1h 51min 20.2s.

For simplicity, the number of charge transfer pathways for each compound were limited to three hole and three electron pathways with the highest  $|V|$  value. The disregarded pathways contributed less than 3% of the total sum of  $|V|$  ( $\Sigma|V|$ ).

**Data of the hole and electron CT pathways for luminophores 1–4**

$H_n$  – hole transfer pathways,  $n = 1–3$ ;  $E_n$  – electron transfer pathways,  $n = 1–3$

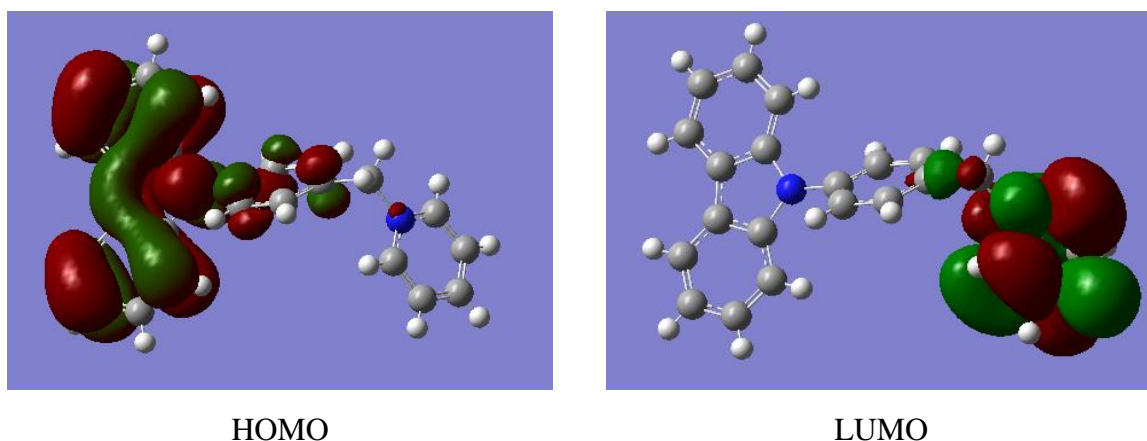**Fig. S25.** Representation of HOMO and LUMO orbitals of compound **1****Table S2.** Electron coupling and energy calculation results for emitter **1**

|                                     |                                   | <b>H<sub>1</sub></b> | <b>H<sub>2</sub></b> | <b>H<sub>3</sub></b> |
|-------------------------------------|-----------------------------------|----------------------|----------------------|----------------------|
| <b>HOMO-HOMO, Hole transfer</b>     | <b>J</b>                          | -0.0099              | 0.0516               | 0.0380               |
|                                     | <b>ε<sub>1</sub></b>              | -9.6448              | -9.4751              | -9.1907              |
|                                     | <b>ε<sub>2</sub></b>              | -9.6446              | -9.1446              | -9.2187              |
|                                     | <b>S</b>                          | 0.0006               | -0.0034              | -0.0033              |
|                                     | <b> V , eV</b>                    | 0.0042               | 0.0204               | 0.0077               |
|                                     | <b>E<sub>(RB3LYP)</sub>, A.U.</b> | -2070.388            | -2070.433            | -2070.401            |
|                                     |                                   | <b>E<sub>1</sub></b> | <b>E<sub>2</sub></b> | <b>E<sub>3</sub></b> |
| <b>LUMO-LUMO, Electron transfer</b> | <b>J</b>                          | 0.1388               | 0.0006               | -0.0048              |
|                                     | <b>ε<sub>1</sub></b>              | -8.8727              | -7.6458              | -8.2709              |
|                                     | <b>ε<sub>2</sub></b>              | -8.8734              | -7.5824              | -8.2879              |
|                                     | <b>S</b>                          | -0.0101              | -0.0001              | 0.0003               |
|                                     | <b> V , eV</b>                    | 0.0494               | 0.0001               | 0.0023               |
|                                     | <b>E<sub>(RB3LYP)</sub>, A.U.</b> | -2070.388            | -2070.433            | -2070.401            |



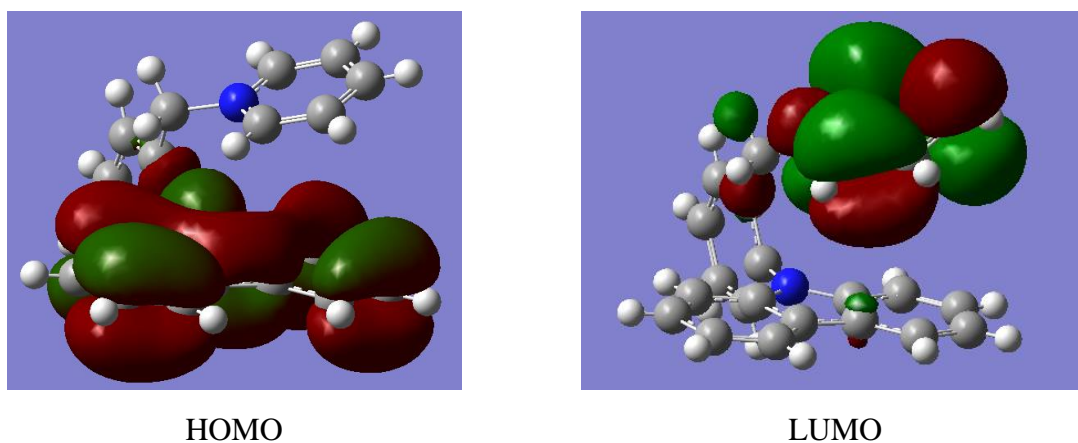**Fig. S26.** Representation of HOMO and LUMO orbitals of compound **2a****Table S3.** Electron coupling and energy calculation results for emitter **2a**

|                                 |                                   | <b>H<sub>1</sub></b> | <b>H<sub>2</sub></b> | <b>H<sub>3</sub></b> |
|---------------------------------|-----------------------------------|----------------------|----------------------|----------------------|
| <b>HOMO-HOMO, Hole transfer</b> | <b>J</b>                          | -0.0036              | 0.0722               | -0.0085              |
|                                 | <b>ε<sub>1</sub></b>              | -10.0517             | -10.3287             | -10.2146             |
|                                 | <b>ε<sub>2</sub></b>              | -10.4751             | -10.4134             | -9.8416              |
|                                 | <b>S</b>                          | 0.0001               | -0.0047              | 0.0007               |
|                                 | <b> V , eV</b>                    | 0.0023               | 0.0236               | 0.0017               |
|                                 | <b>E<sub>(RB3LYP)</sub>, A.U.</b> | -2070.420            | -2070.432            | -2070.437            |

|                                     |                                   | <b>E<sub>1</sub></b> | <b>E<sub>2</sub></b> | <b>E<sub>3</sub></b> |
|-------------------------------------|-----------------------------------|----------------------|----------------------|----------------------|
| <b>LUMO-LUMO, Electron transfer</b> | <b>J</b>                          | 0.0110               | -0.2184              | -0.0001              |
|                                     | <b>ε<sub>1</sub></b>              | -7.9428              | -8.5041              | -7.6042              |
|                                     | <b>ε<sub>2</sub></b>              | -7.8967              | -8.4500              | -7.5108              |
|                                     | <b>S</b>                          | -0.0009              | 0.0154               | 0.00001              |
|                                     | <b> V , eV</b>                    | 0.0036               | 0.0877               | 0.00002              |
|                                     | <b>E<sub>(RB3LYP)</sub>, A.U.</b> | -2070.420            | -2070.401            | -2070.437            |

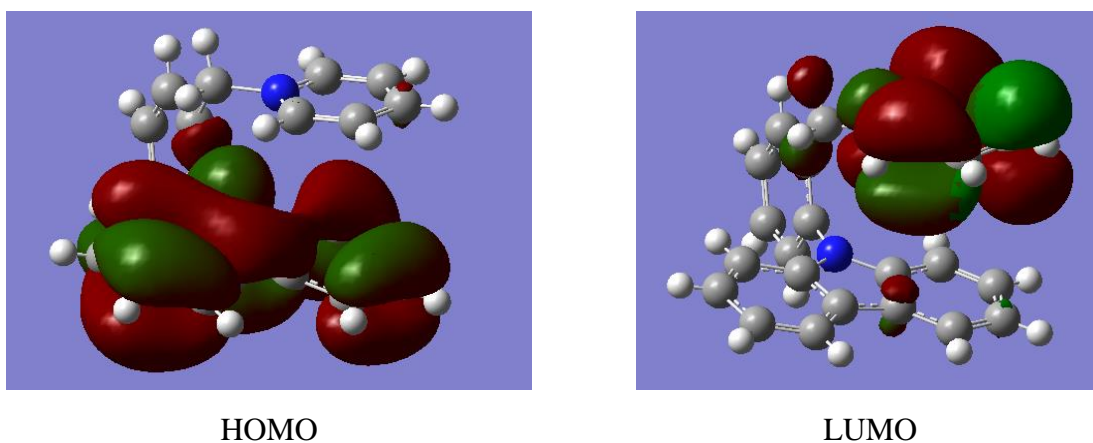**Fig. S27.** Representation of HOMO and LUMO orbitals of compound **2b****Table S4.** Electron coupling and energy calculation results for emitter **2b**

|                                 |                                   | <b>H<sub>1</sub></b> | <b>H<sub>2</sub></b> | <b>H<sub>3</sub></b> |
|---------------------------------|-----------------------------------|----------------------|----------------------|----------------------|
| <b>HOMO-HOMO, Hole transfer</b> | <b>J</b>                          | 0.0124               | 0.1001               | -0.0328              |
|                                 | <b>ε<sub>1</sub></b>              | -10.0573             | -10.0815             | -10.0345             |
|                                 | <b>ε<sub>2</sub></b>              | -9.9387              | -10.1741             | -10.2457             |
|                                 | <b>S</b>                          | -0.0008              | -0.0070              | 0.0021               |
|                                 | <b> V , eV</b>                    | 0.0043               | 0.0289               | 0.0113               |
|                                 | <b>E<sub>(RB3LYP)</sub>, A.U.</b> | -2070.428            | -2070.436            | -2070.419            |

  

|                                     |                                   | <b>E<sub>1</sub></b> | <b>E<sub>2</sub></b> | <b>E<sub>3</sub></b> |
|-------------------------------------|-----------------------------------|----------------------|----------------------|----------------------|
| <b>LUMO-LUMO, Electron transfer</b> | <b>J</b>                          | -0.0863              | -0.0552              | 0.0180               |
|                                     | <b>ε<sub>1</sub></b>              | -8.4170              | -7.8138              | -7.7625              |
|                                     | <b>ε<sub>2</sub></b>              | -8.4167              | -7.8140              | -7.6842              |
|                                     | <b>S</b>                          | 0.0053               | 0.0048               | -0.0016              |
|                                     | <b> V , eV</b>                    | 0.0413               | 0.0174               | 0.0055               |
|                                     | <b>E<sub>(RB3LYP)</sub>, A.U.</b> | -2070.400            | -2070.415            | -2070.419            |

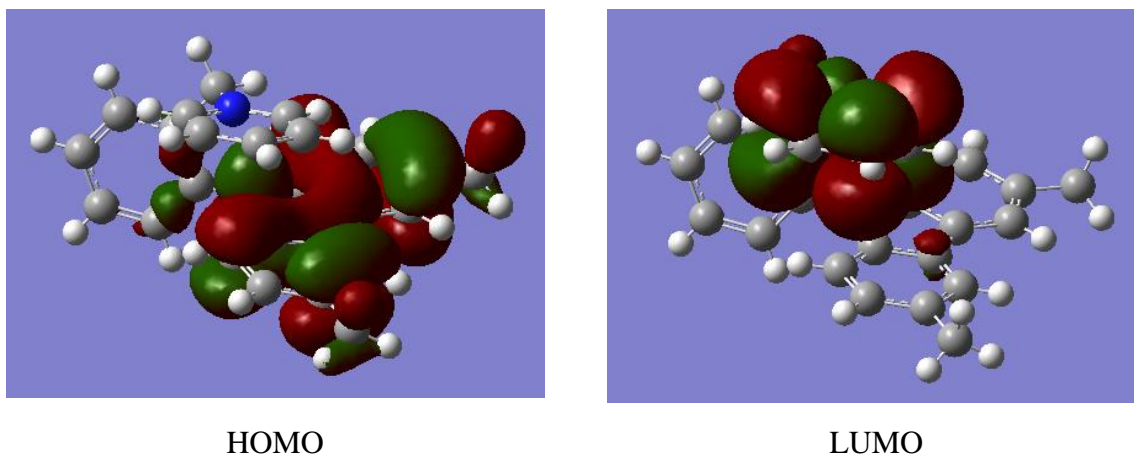**Fig. S28.** Representation of HOMO and LUMO orbitals of compound **3****Table S5.** Electron coupling and energy calculation results for emitter **3**

|                                   |                      | <b>H<sub>1</sub></b> | <b>H<sub>2</sub></b> | <b>H<sub>3</sub></b> |
|-----------------------------------|----------------------|----------------------|----------------------|----------------------|
| <b>HOMO-HOMO, Hole transfer</b>   | <b>J</b>             | -0.0028              | 0.0083               | 0.0116               |
|                                   | <b>ε<sub>1</sub></b> | -9.9012              | -10.2161             | -9.6254              |
|                                   | <b>ε<sub>2</sub></b> | -9.8988              | -9.6118              | -10.1842             |
|                                   | <b>S</b>             | 0.0002               | -0.0006              | -0.0008              |
|                                   | <b> V , eV</b>       | 0.0011               | 0.0022               | 0.0032               |
| <b>E<sub>(RB3LYP)</sub>, A.U.</b> |                      | -2227.860            | -2227.874            | -2227.874            |

|                                     |                      | <b>E<sub>1</sub></b> | <b>E<sub>2</sub></b> | <b>E<sub>3</sub></b> |
|-------------------------------------|----------------------|----------------------|----------------------|----------------------|
| <b>LUMO-LUMO, Electron transfer</b> | <b>J</b>             | -0.7927              | -0.0079              | -0.0137              |
|                                     | <b>ε<sub>1</sub></b> | -8.3375              | -7.5282              | -7.7939              |
|                                     | <b>ε<sub>2</sub></b> | -8.3346              | -7.5165              | -7.9365              |
|                                     | <b>S</b>             | 0.0613               | 0.0007               | 0.0014               |
|                                     | <b> V , eV</b>       | 0.2829               | 0.0025               | 0.0029               |
| <b>E<sub>(RB3LYP)</sub>, A.U.</b>   |                      | -2227.860            | -2227.886            | -2227.874            |



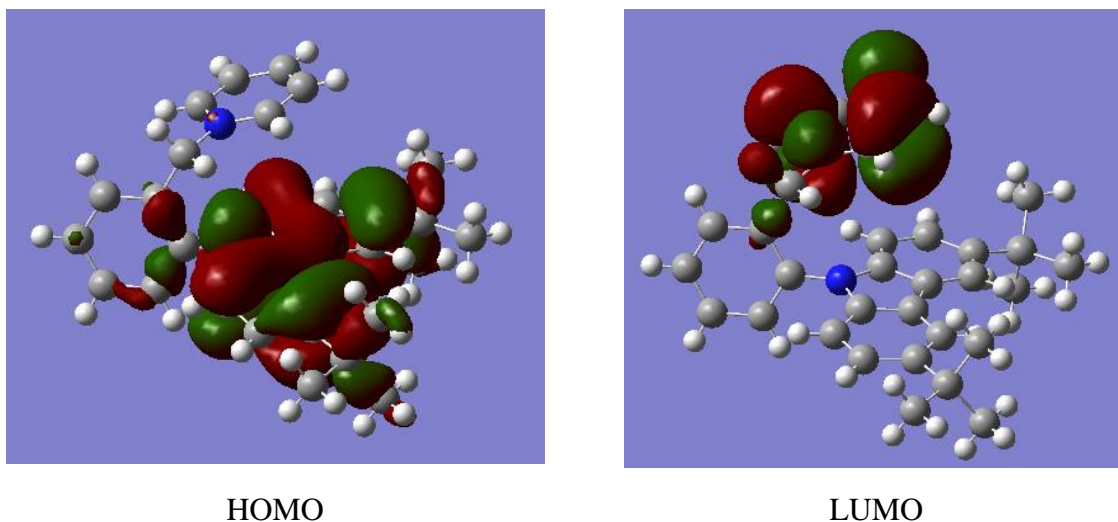**Fig. S29.** Representation of HOMO and LUMO orbitals of compound **4a****Table S6.** Electron coupling and energy calculation results for emitter **4a**

|                                              |                                   | H <sub>1</sub> | H <sub>2</sub> | H <sub>3</sub> |
|----------------------------------------------|-----------------------------------|----------------|----------------|----------------|
| <b>HOMO-<br/>HOMO,<br/>Hole<br/>transfer</b> | <b>J</b>                          | 0.0784         | 0.0557         | 0.0220         |
|                                              | $\epsilon_1$                      | -9.7809        | -9.7064        | -9.2895        |
|                                              | $\epsilon_2$                      | -9.7401        | -9.7946        | -9.3578        |
|                                              | <b>S</b>                          | -0.0049        | -0.0036        | -0.0016        |
|                                              | <b> V , eV</b>                    | 0.0307         | 0.0211         | 0.0075         |
|                                              | <b>E<sub>(RB3LYP)</sub>, A.U.</b> | -2699.503      | -2699.504      | -2699.525      |

|                                                  |                                   | E <sub>1</sub> | E <sub>2</sub> | E <sub>3</sub> |
|--------------------------------------------------|-----------------------------------|----------------|----------------|----------------|
| <b>LUMO-<br/>LUMO,<br/>Electron<br/>transfer</b> | <b>J</b>                          | -0.1029        | 0.0780         | 0.0867         |
|                                                  | $\epsilon_1$                      | -8.3346        | -8.0736        | -7.9269        |
|                                                  | $\epsilon_2$                      | -8.3275        | -7.9298        | -8.1118        |
|                                                  | <b>S</b>                          | 0.0075         | -0.0063        | -0.0069        |
|                                                  | <b> V , eV</b>                    | 0.0403         | 0.0277         | 0.0317         |
|                                                  | <b>E<sub>(RB3LYP)</sub>, A.U.</b> | -2699.500      | -2699.503      | -2699.504      |

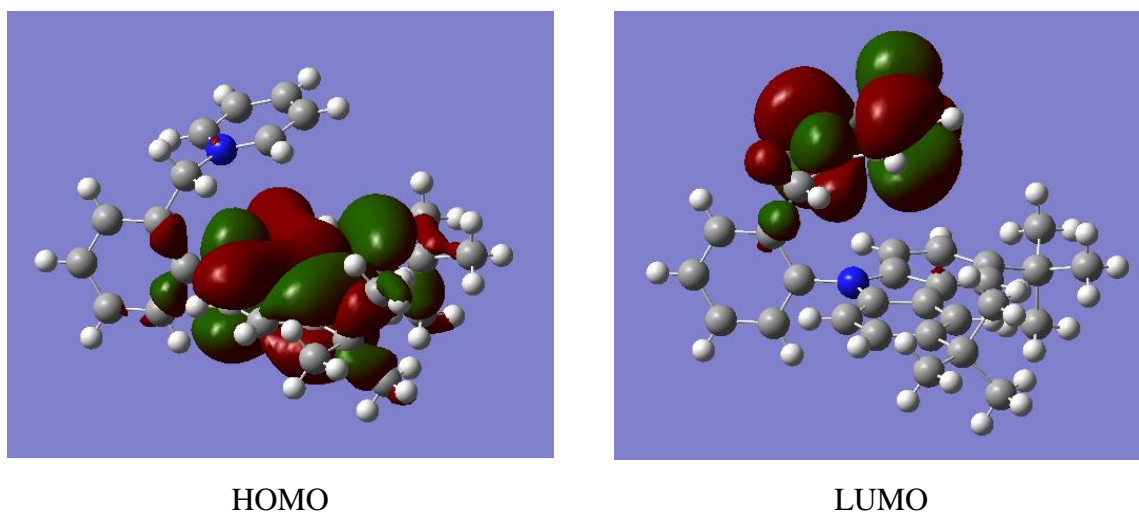**Fig. S30.** Representation of HOMO and LUMO orbitals of compound **4b****Table S7.** Electron coupling and energy calculation results for emitter **4b**

|                                     |                                   | <b>H<sub>1</sub></b> | <b>H<sub>2</sub></b> | <b>H<sub>3</sub></b> |
|-------------------------------------|-----------------------------------|----------------------|----------------------|----------------------|
| <b>HOMO-HOMO, Hole transfer</b>     | <b>J</b>                          | 0.0847               | -0.0007              | -0.0047              |
|                                     | <b>ε<sub>1</sub></b>              | -9.6548              | -9.3320              | -9.2602              |
|                                     | <b>ε<sub>2</sub></b>              | -9.8017              | -9.3164              | -9.3233              |
|                                     | <b>S</b>                          | -0.0054              | 0.0001               | 0.0003               |
|                                     | <b> V , eV</b>                    | 0.0326               | 0.0003               | 0.0015               |
|                                     | <b>E<sub>(RB3LYP)</sub>, A.U.</b> | -2699.532            | -2699.541            | -2699.554            |
|                                     |                                   | <b>E<sub>1</sub></b> | <b>E<sub>2</sub></b> | <b>E<sub>3</sub></b> |
| <b>LUMO-LUMO, Electron transfer</b> | <b>J</b>                          | 0.0756               | 0.0495               | -0.0021              |
|                                     | <b>ε<sub>1</sub></b>              | -7.8299              | -7.6996              | -7.4270              |
|                                     | <b>ε<sub>2</sub></b>              | -7.9884              | -7.8597              | -7.4719              |
|                                     | <b>S</b>                          | -0.0066              | -0.0043              | 0.0002               |
|                                     | <b> V , eV</b>                    | 0.0237               | 0.0159               | 0.0008               |
|                                     | <b>E<sub>(RB3LYP)</sub>, A.U.</b> | -2699.532            | -2699.541            | -2699.554            |

Accordingly, the CTI analysis demonstrated that the sum of absolute electronic couplings  $\Sigma(|V|)$  for each of the luminophores **1–4** correlated well ( $R^2=0.95$ ) with the corresponding solid state  $\Phi$  (see manuscript for details).

## CTI analysis for luminophores 15–17

CTI analysis (as described above) was also performed for luminophores **15–17** of completely distinct design, developed in 2020 by Shi, Lu and co-workers<sup>4</sup> (Fig. S31).

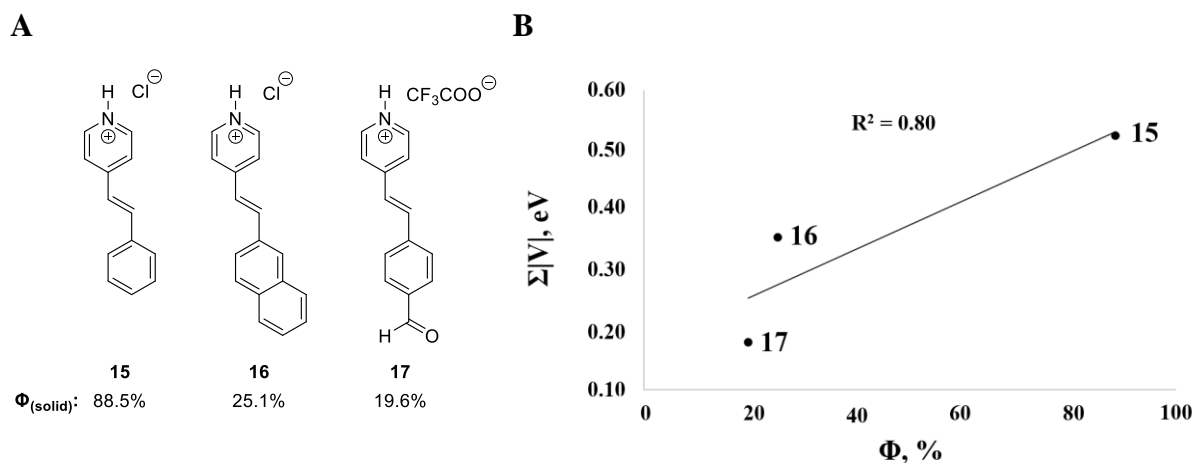

**Fig. S31.** A: Luminophores **15–17**; B: Correlation between the  $\Sigma|V|$  and  $\Phi$  for **15–17**

**Table S8.** Electron coupling and energy calculation results for emitter **15**

|                                   |                      | <b>H<sub>1</sub></b> | <b>H<sub>2</sub></b> | <b>H<sub>3</sub></b> |
|-----------------------------------|----------------------|----------------------|----------------------|----------------------|
| <b>HOMO-HOMO, Hole transfer</b>   | <b>J</b>             | -0.4088              | 0.0005               | 0.4140               |
|                                   | <b>ε<sub>1</sub></b> | -12.3148             | -11.1400             | -12.1624             |
|                                   | <b>ε<sub>2</sub></b> | -12.3154             | -11.3729             | -12.1624             |
|                                   | <b>S</b>             | 0.0220               | -0.0000              | -0.0228              |
|                                   | <b> V , eV</b>       | 0.1386               | 0.0003               | 0.1373               |
| <b>E<sub>(RB3LYP)</sub>, A.U.</b> |                      | -1113.994            | -1114.002            | -1114.001            |

  

|                                     |                      | <b>E<sub>1</sub></b> | <b>E<sub>2</sub></b> | <b>E<sub>3</sub></b> |
|-------------------------------------|----------------------|----------------------|----------------------|----------------------|
| <b>LUMO-LUMO, Electron transfer</b> | <b>J</b>             | 0.1894               | -0.0145              | -0.3810              |
|                                     | <b>ε<sub>1</sub></b> | -8.8479              | -8.1884              | -8.6213              |
|                                     | <b>ε<sub>2</sub></b> | -8.8471              | -8.3241              | -8.6213              |
|                                     | <b>S</b>             | -0.0123              | 0.0014               | 0.0252               |
|                                     | <b> V , eV</b>       | 0.0809               | 0.0030               | 0.1641               |
| <b>E<sub>(RB3LYP)</sub>, A.U.</b>   |                      | -1113.994            | -1114.002            | -1114.001            |

**Table S9.** Electron coupling and energy calculation results for emitter **16**

|                                     |                                   | <b>H<sub>1</sub></b> | <b>H<sub>2</sub></b> | <b>H<sub>3</sub></b> |
|-------------------------------------|-----------------------------------|----------------------|----------------------|----------------------|
| <b>HOMO-HOMO, Hole transfer</b>     | <b>J</b>                          | -0.0023              | -0.4172              | -0.0098              |
|                                     | <b>ε<sub>1</sub></b>              | -10.0394             | -11.1654             | -9.8120              |
|                                     | <b>ε<sub>2</sub></b>              | -10.0399             | -11.1631             | -9.8109              |
|                                     | <b>S</b>                          | 0.0004               | 0.0244               | 0.0008               |
|                                     | <b> V , eV</b>                    | 0.0014               | 0.1449               | 0.0018               |
|                                     | <b>E<sub>(RB3LYP)</sub>, A.U.</b> | -1421.344            | -1421.315            | -1421.351            |
|                                     |                                   | <b>E<sub>1</sub></b> | <b>E<sub>2</sub></b> | <b>E<sub>3</sub></b> |
| <b>LUMO-LUMO, Electron transfer</b> | <b>J</b>                          | -0.4534              | 0.0021               | 0.0244               |
|                                     | <b>ε<sub>1</sub></b>              | -8.5060              | -7.8924              | -8.0894              |
|                                     | <b>ε<sub>2</sub></b>              | -8.5066              | -7.6158              | -8.0905              |
|                                     | <b>S</b>                          | 0.0296               | -0.0002              | -0.0025              |
|                                     | <b> V , eV</b>                    | 0.2016               | 0.0005               | 0.0043               |
|                                     | <b>E<sub>(RB3LYP)</sub>, A.U.</b> | -1421.315            | -1421.338            | -1421.320            |

**Table S10.** Electron coupling and energy calculation results for emitter **17**

|                                 |                                   | <b>H<sub>1</sub></b> | <b>H<sub>2</sub></b> | <b>H<sub>3</sub></b> |
|---------------------------------|-----------------------------------|----------------------|----------------------|----------------------|
| <b>HOMO-HOMO, Hole transfer</b> | <b>J</b>                          | -0.0173              | 0.0070               | 0.0020               |
|                                 | <b>ε<sub>1</sub></b>              | -11.9185             | -11.1882             | -11.8367             |
|                                 | <b>ε<sub>2</sub></b>              | -11.9191             | -11.1882             | -10.5221             |
|                                 | <b>S</b>                          | 0.0010               | -0.0004              | -0.0002              |
|                                 | <b> V , eV</b>                    | 0.0049               | 0.0021               | 0.0003               |
|                                 | <b>E<sub>(RB3LYP)</sub>, A.U.</b> | -1340.788            | -1340.774            | -1340.759            |

  

|                                     |                                   | <b>E<sub>1</sub></b> | <b>E<sub>2</sub></b> | <b>E<sub>3</sub></b> |
|-------------------------------------|-----------------------------------|----------------------|----------------------|----------------------|
| <b>LUMO-LUMO, Electron transfer</b> | <b>J</b>                          | -0.4227              | 0.0072               | -0.0071              |
|                                     | <b>ε<sub>1</sub></b>              | -9.1968              | -8.0516              | -8.5747              |
|                                     | <b>ε<sub>2</sub></b>              | -9.1971              | -8.0512              | -8.0043              |
|                                     | <b>S</b>                          | 0.0281               | -0.0005              | 0.0004               |
|                                     | <b> V , eV</b>                    | 0.1646               | 0.0033               | 0.0037               |
|                                     | <b>E<sub>(RB3LYP)</sub>, A.U.</b> | -1340.728            | -1340.788            | -1340.759            |

The CTI analysis demonstrated that the sum of absolute electronic couplings  $\Sigma(|V|)$  for luminophores **15–17** correlated well with the corresponding solid state  $\Phi$  values. The lower correlation value ( $R^2=0.80$ ) for **15–17** as compared to that for luminophores **1–4** possibly is a consequence of insufficient data points (only three are available) and overestimation of the CTI value for **16**, due to the larger total  $\pi$ -system of the molecule.

## References

1. K. Leduskrasts, E. Suna, *RSC Adv.* **2019**, 9, 460–465. DOI: [10.1039/C8RA08771G](https://doi.org/10.1039/C8RA08771G)
2. Brown, J. S. Catnip (version 1.9), **2018**. Available from [https://github.com/JoshuaSBrown/QC\\_Tools](https://github.com/JoshuaSBrown/QC_Tools)
3. Frisch, M. J.; Trucks, G. W.; Schlegel, H. B.; Scuseria, G. E.; Robb, M. A.; Cheeseman, J. R.; Scalmani, G.; Barone, V.; Mennucci, B.; Petersson, G. A.; Nakatsuji, H.; Caricato, M.; Li, X.; Hratchian, H. P.; Izmaylov, A. F.; Bloino, J.; Zheng, G.; Sonnenberg, J. L.; Hada, M.; Ehara, M.; Toyota, K.; Fukuda, R.; Hasegawa, J.; Ishida, M.; Nakajima, T.; Honda, Y.; Kitao, O.; Nakai, H.; Vreven, T.; Jr., J. A. M.; Peralta, J. E.; Ogliaro, F.; Bearpark, M.; Heyd, J. J.; Brothers, E.; Kudin, K. N.; Staroverov, V. N.; Keith, T.; Kobayashi, R.; Normand, J.; Raghavachari, K.; Rendell, A.; Burant, J. C.; Iyengar, S. S.; Tomasi, J.; Cossi, M.; Rega, N.; Millam, J. M.; Klene, M.; Knox, J. E.; Cross, J. B.; Bakken, V.; Adamo, C.; Jaramillo, J.; Gomperts, R.; Stratmann, R. E.; Yazyev, O.; Austin, A. J.; Cammi, R.; Pomelli, C.; Ochterski, J. W.; Martin, R. L.; Morokuma, K.; Zakrzewski, V. G.; Voth, G. A.; Salvador, P.; Dannenberg, J. J.; Dapprich, S.; Daniels, A. D.; Farkas, O.; Foresman, J. B.; Ortiz, J. V.; Cioslowski, J.; Fox, D. J. Gaussian 09, Revision D.01, 2013.
4. X. Cui, Y. Hao, W. Guan, L. Liu, W. Shi, C. Lu, *Adv. Opt. Mater.*, 2020, **8**, 2000125. DOI: [10.1002/adom.202000125](https://doi.org/10.1002/adom.202000125)

**$^1\text{H}$  and  $^{13}\text{C}$  NMR data**

**<sup>1</sup>H NMR** (400 MHz, (CD<sub>3</sub>)<sub>2</sub>SO, ppm) spectrum of 1-(2-(9*H*-carbazol-9-yl)benzyl)pyridin-1-ium methanesulfonate (**2a**)

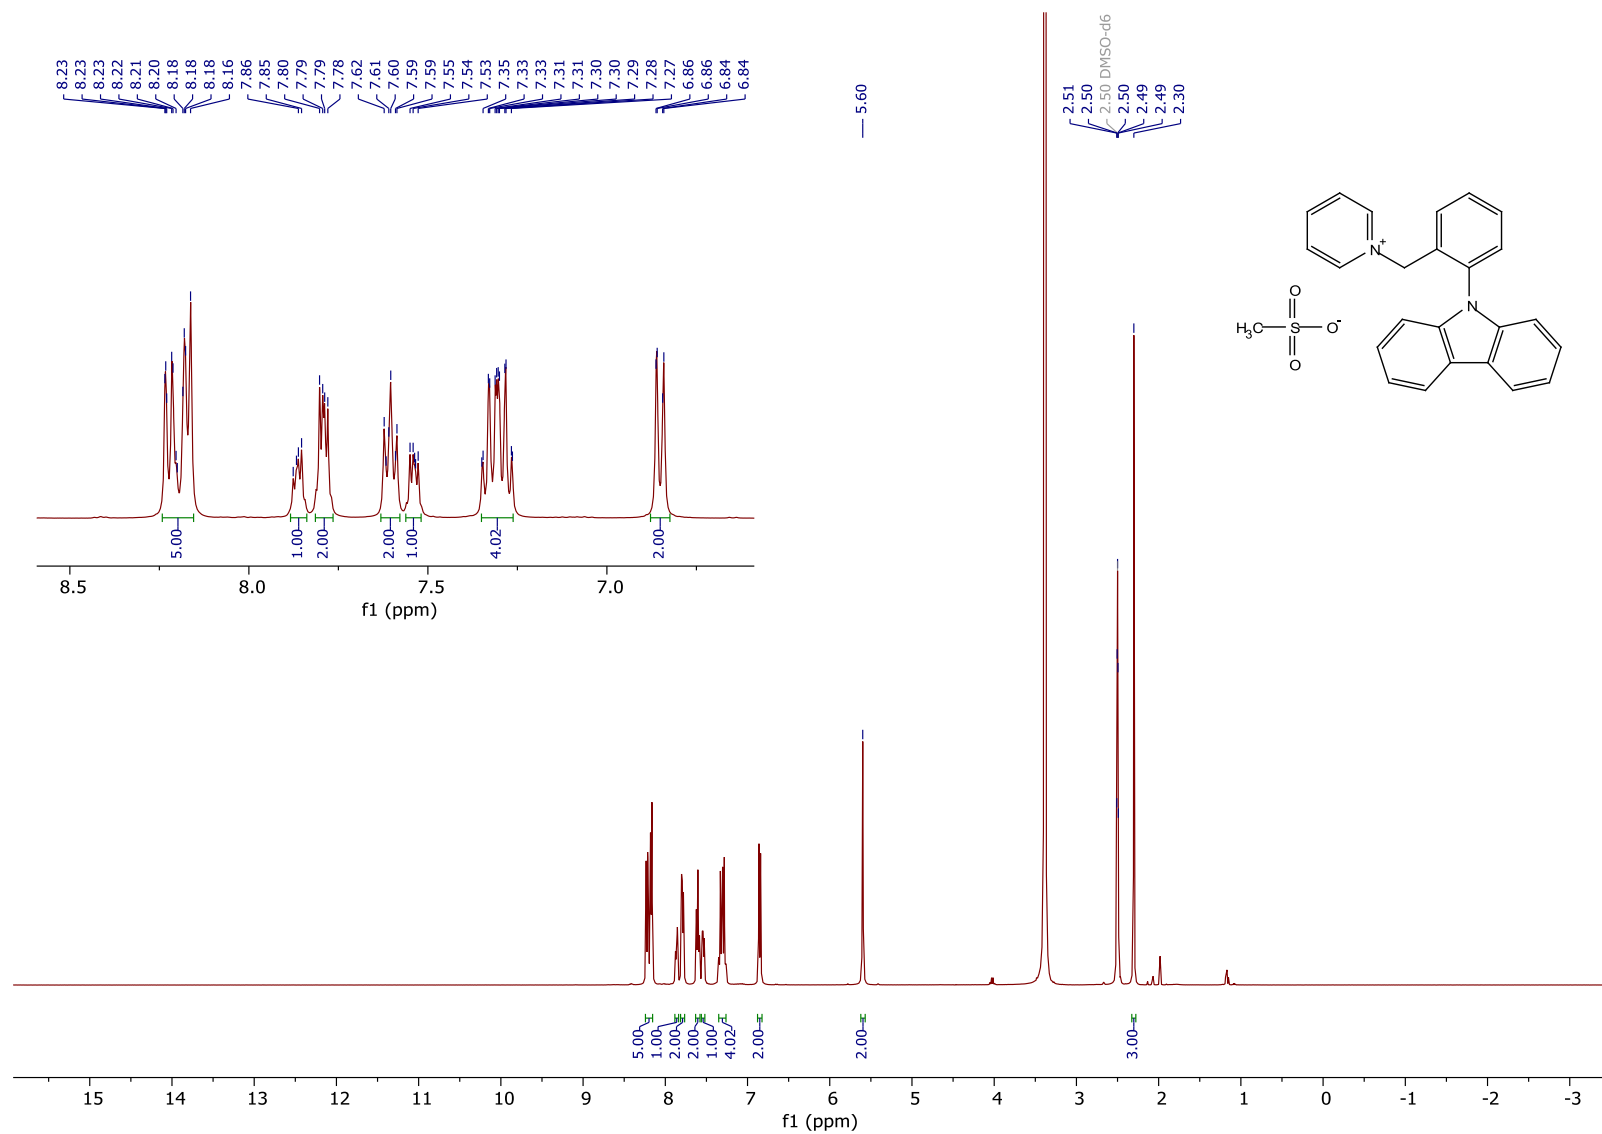



$^{13}\text{C}\{^1\text{H}\}$  NMR (101 MHz,  $(\text{CD}_3)_2\text{SO}$ , ppm) spectrum of 1-(2-(9H-carbazol-9-yl)benzyl)pyridin-1-ium methanesulfonate (**2a**)

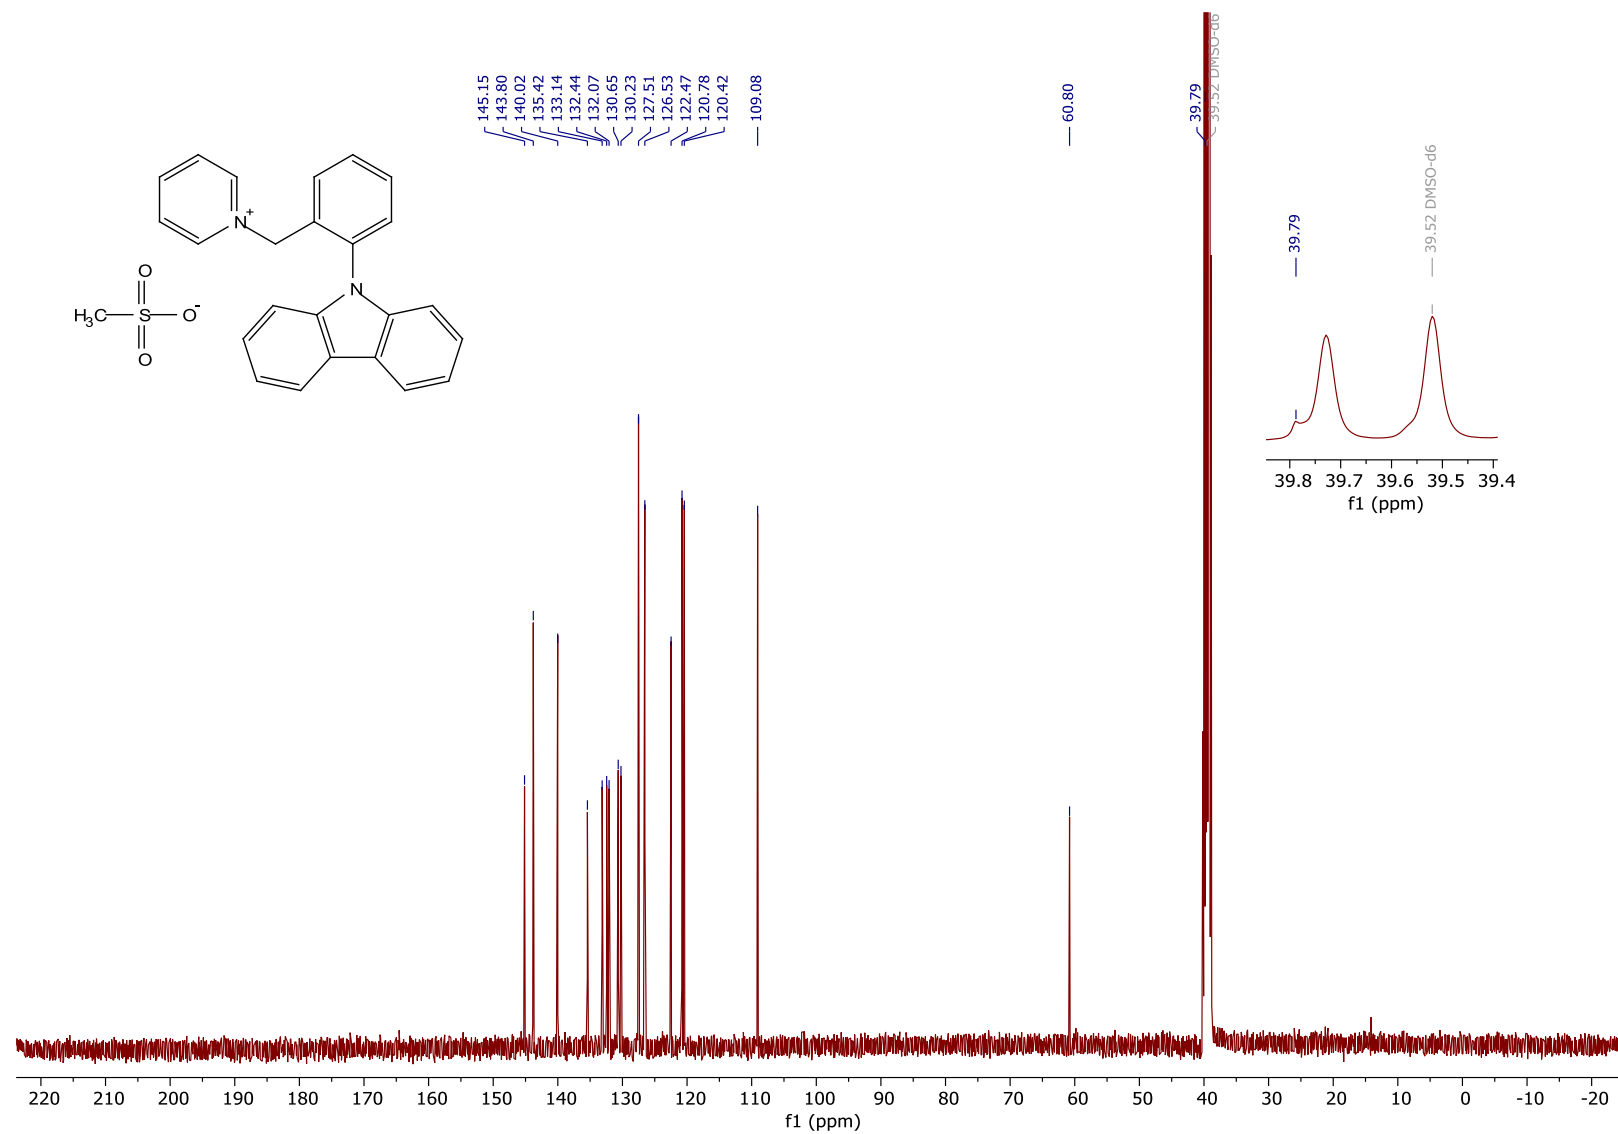

**<sup>1</sup>H NMR** (400 MHz, (CD<sub>3</sub>)<sub>2</sub>SO, ppm) spectrum of 1-(2-(9*H*-carbazol-9-yl)benzyl)pyridin-1-ium chloride (**2b**)

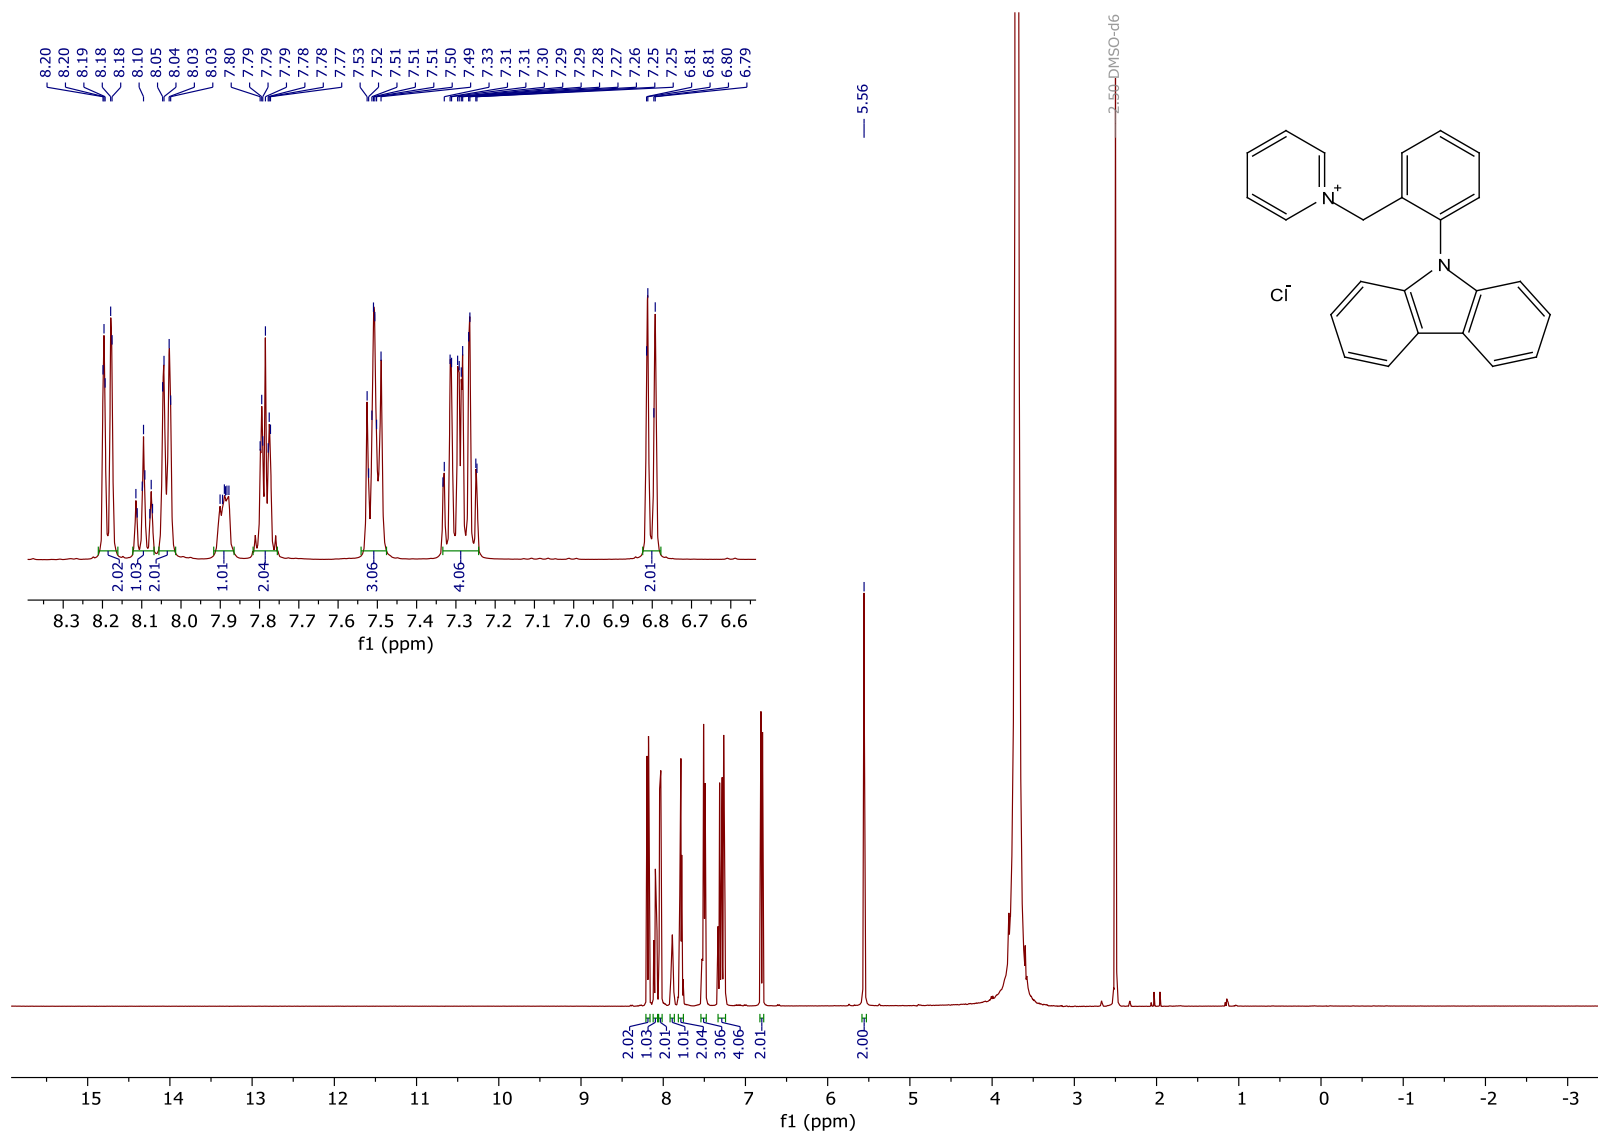

$^{13}\text{C}\{^1\text{H}\}$  NMR (101 MHz,  $(\text{CD}_3)_2\text{SO}$ , ppm) spectrum of 1-(2-(9H-carbazol-9-yl)benzyl)pyridin-1-ium chloride (**2b**)

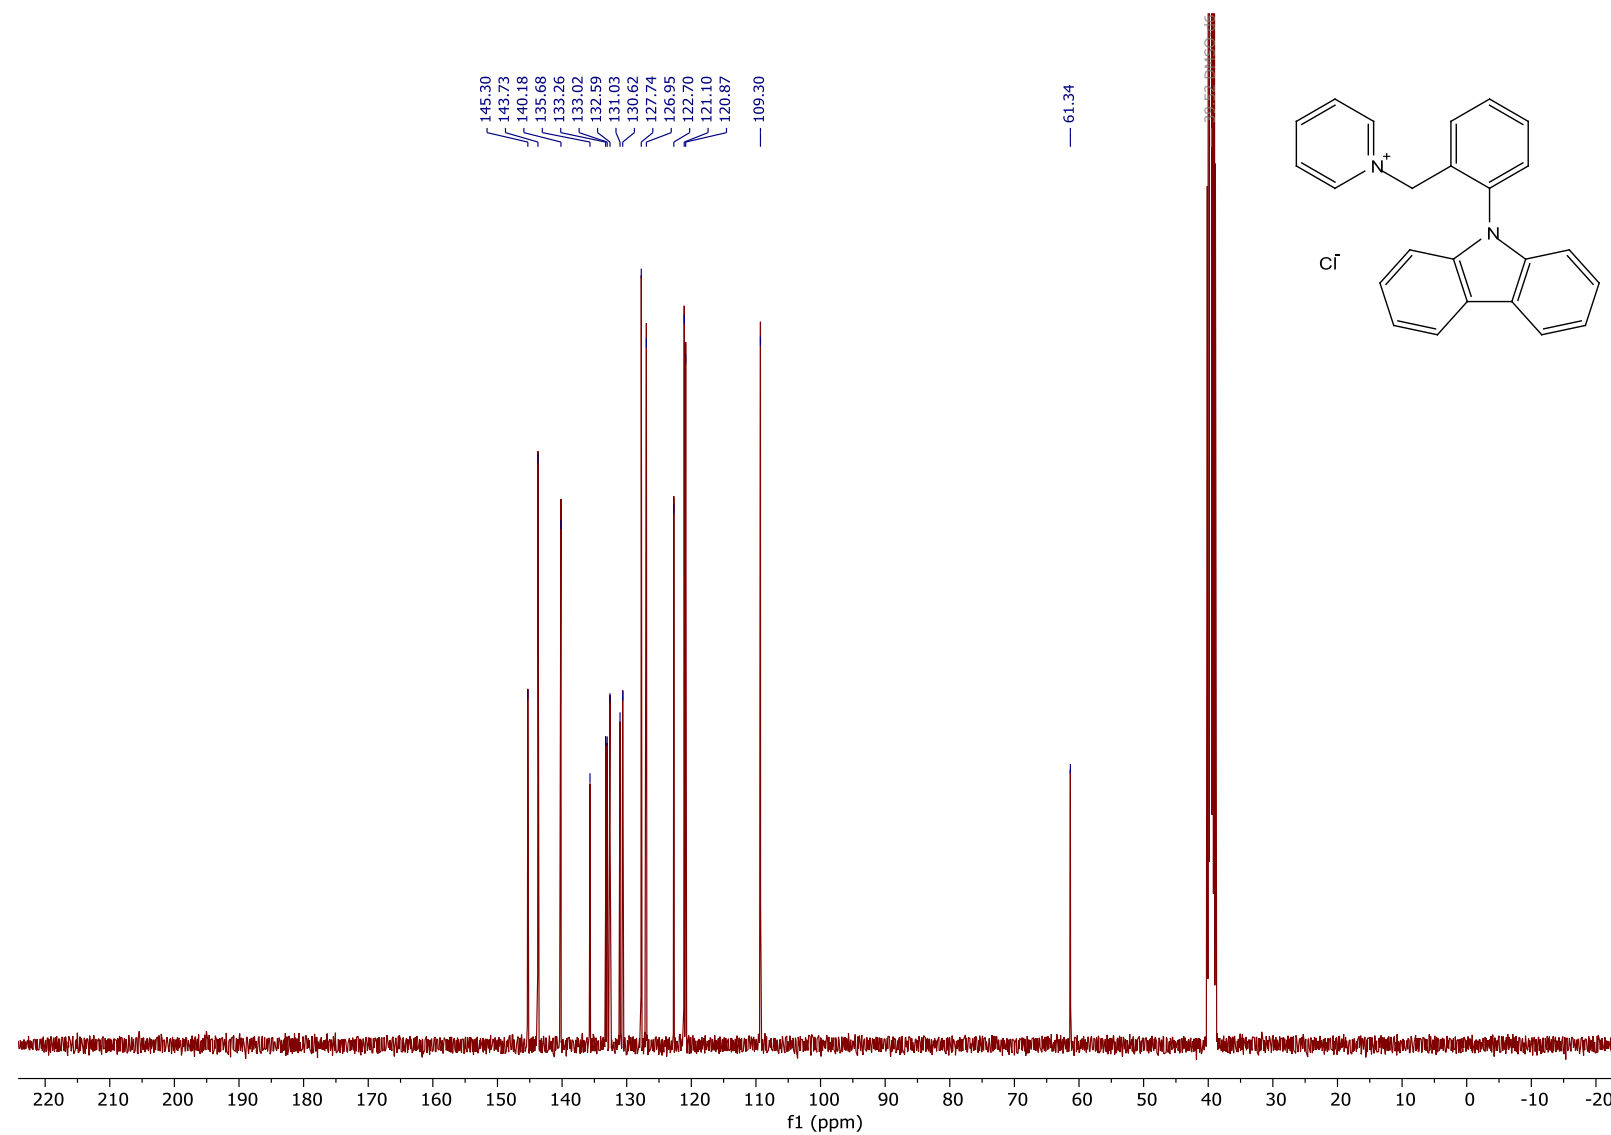

**<sup>1</sup>H NMR** (400 MHz, CD<sub>3</sub>OD, ppm) spectrum of 1-(2-(3,6-dimethyl-9*H*-carbazol-9-yl)benzyl)pyridin-1-ium methanesulfonate (**3**)

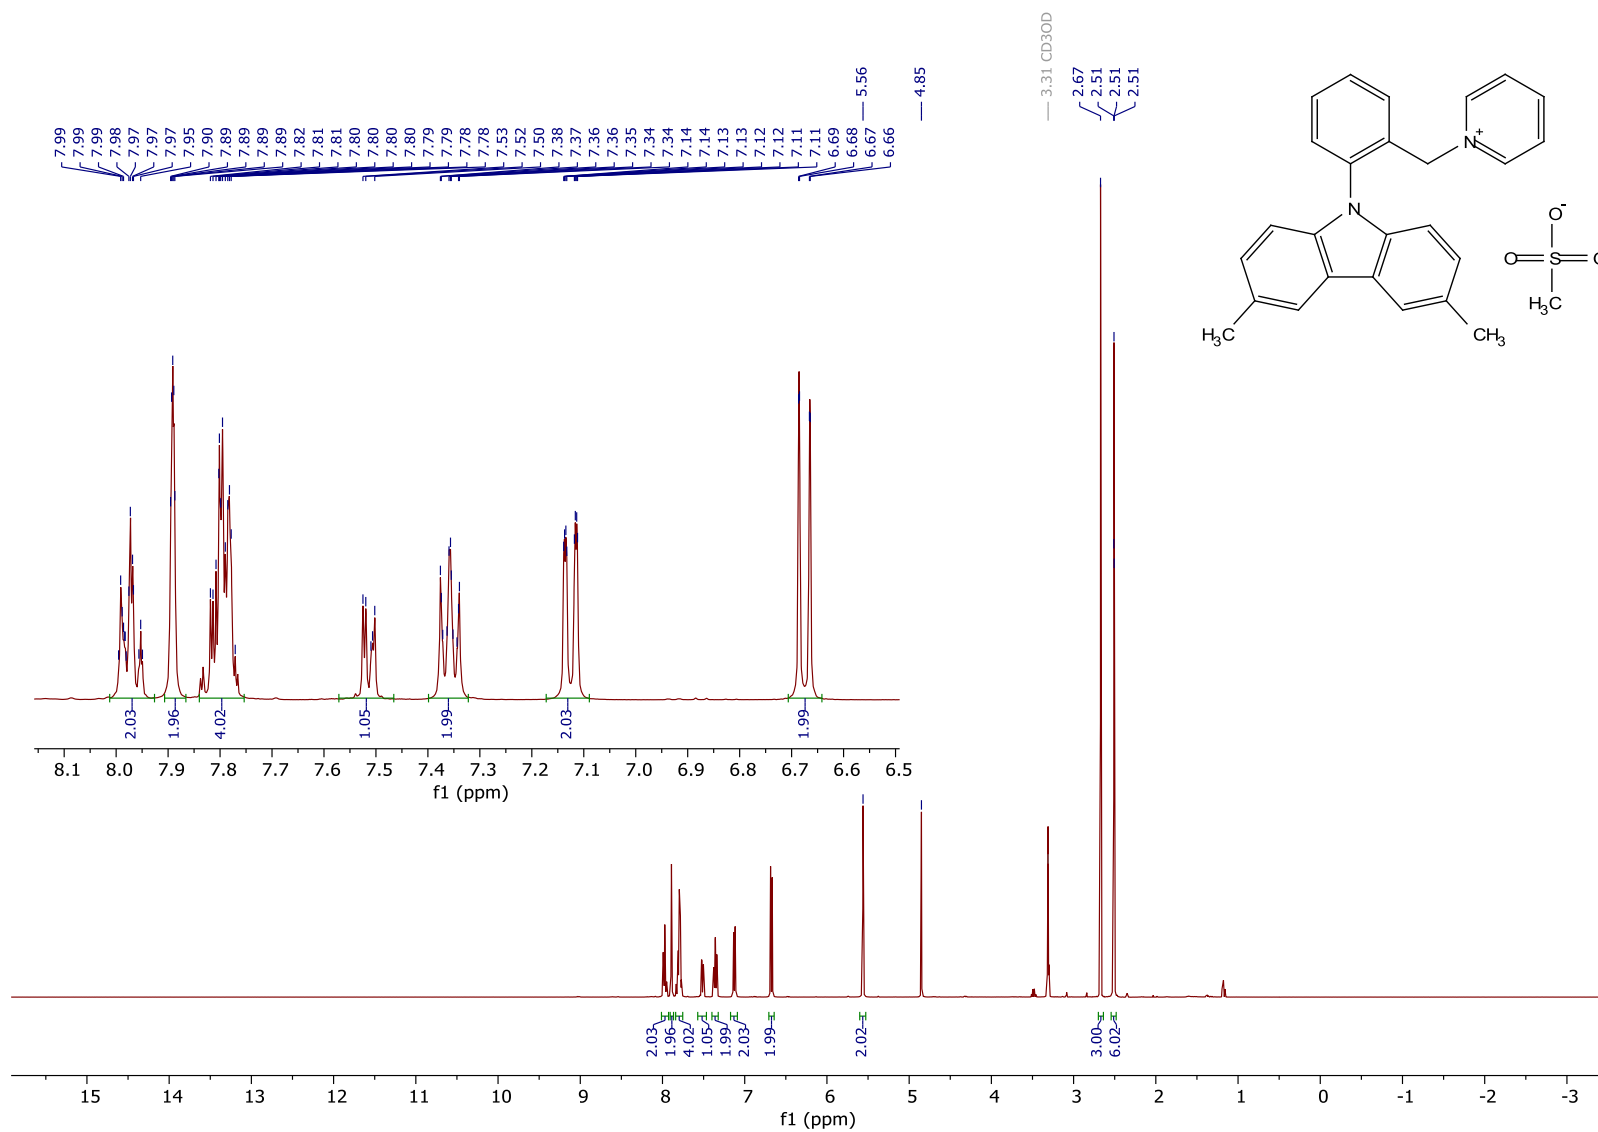

$^{13}\text{C}\{^1\text{H}\}$  NMR (101 MHz,  $\text{CD}_3\text{OD}$ , ppm) spectrum of 1-(2-(3,6-dimethyl-9*H*-carbazol-9-yl)benzyl)pyridin-1-ium methanesulfonate (**3**)

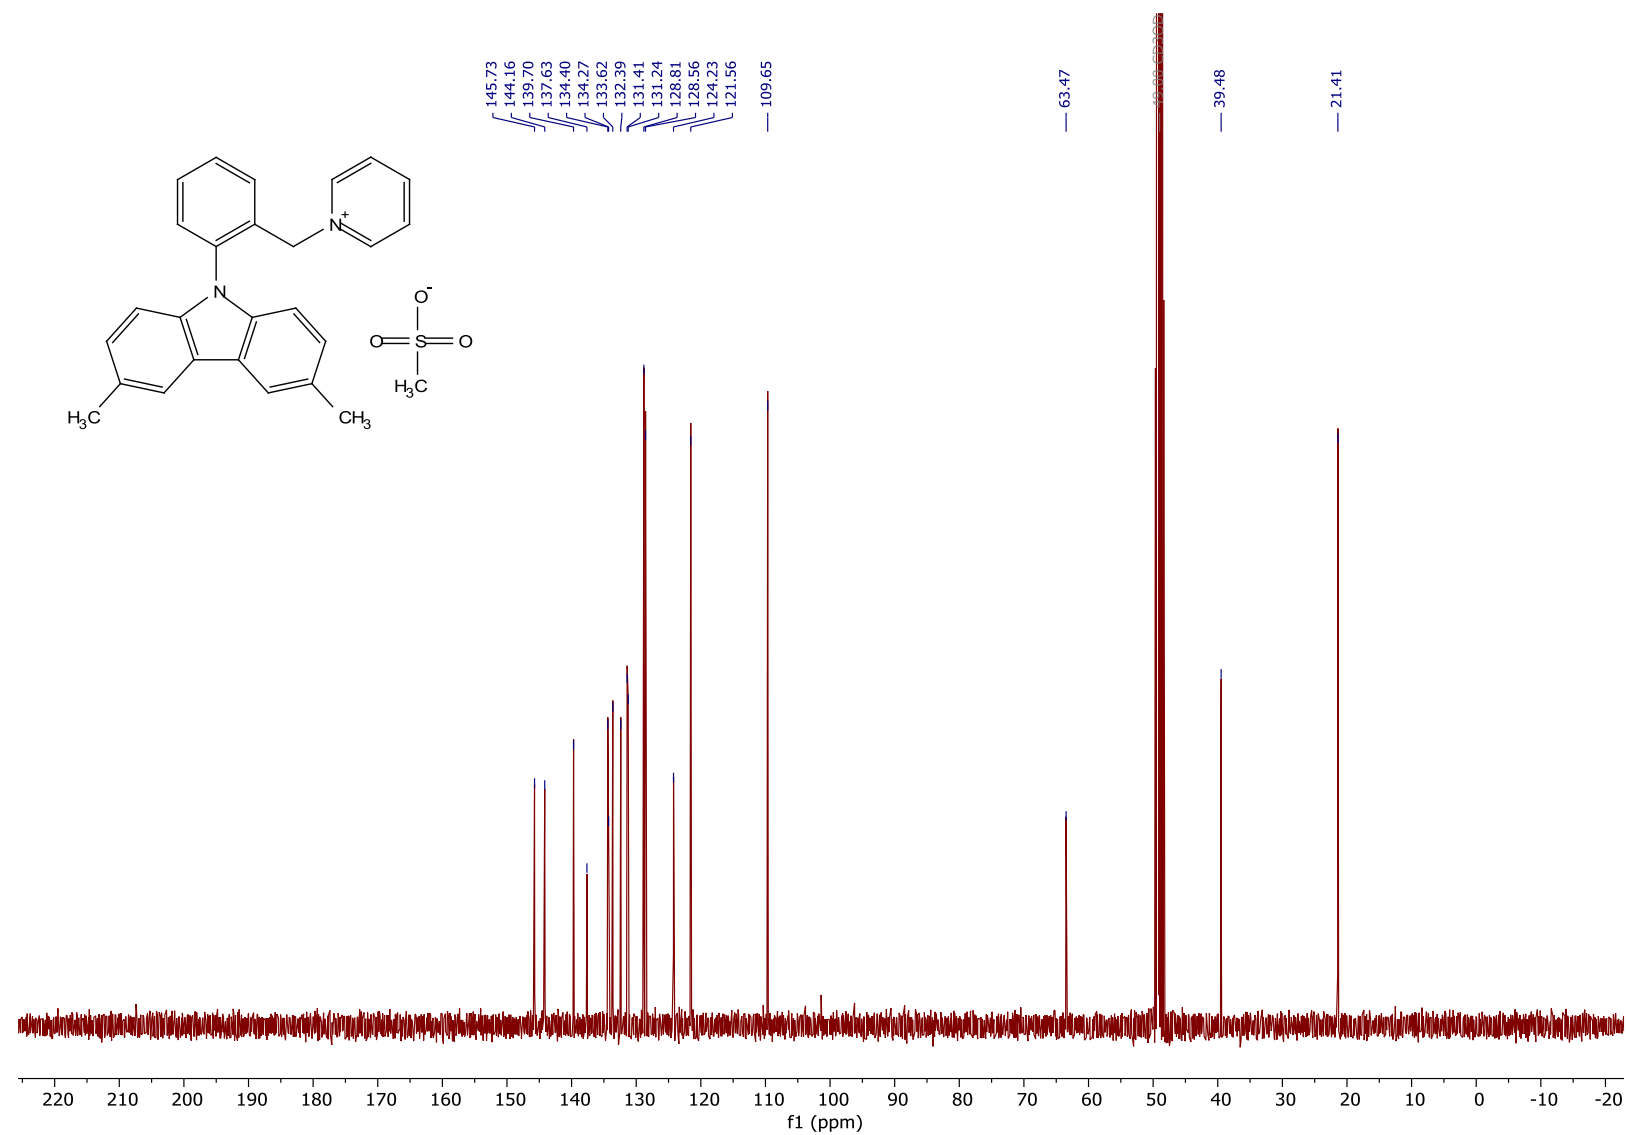

**<sup>1</sup>H NMR** (400 MHz, CD<sub>3</sub>OD, ppm) spectrum of 1-(2-(3,6-di-*tert*-butyl-9*H*-carbazol-9-yl)benzyl)pyridin-1-ium chloride (**4a**)

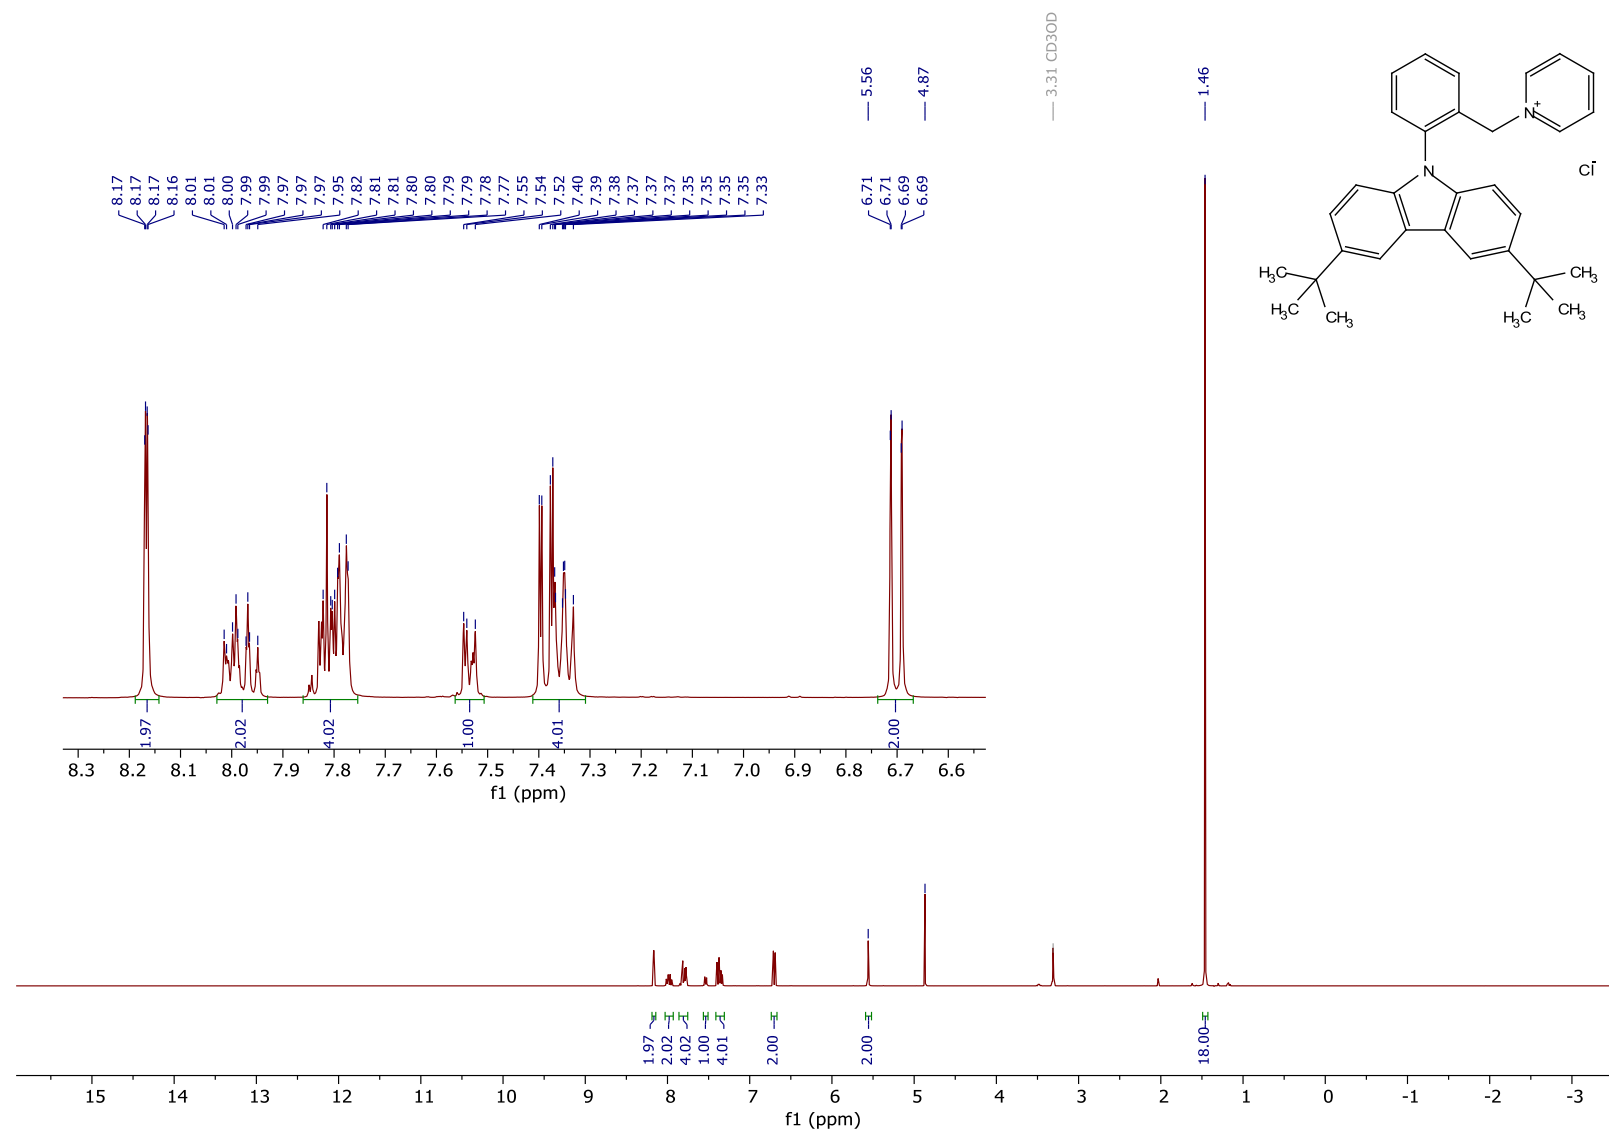

$^{13}\text{C}\{^1\text{H}\}$  NMR (101 MHz,  $\text{CD}_3\text{OD}$ , ppm) spectrum for 1-(2-(3,6-di-*tert*-butyl-9*H*-carbazol-9-yl)benzyl)pyridin-1-ium chloride (**4a**)

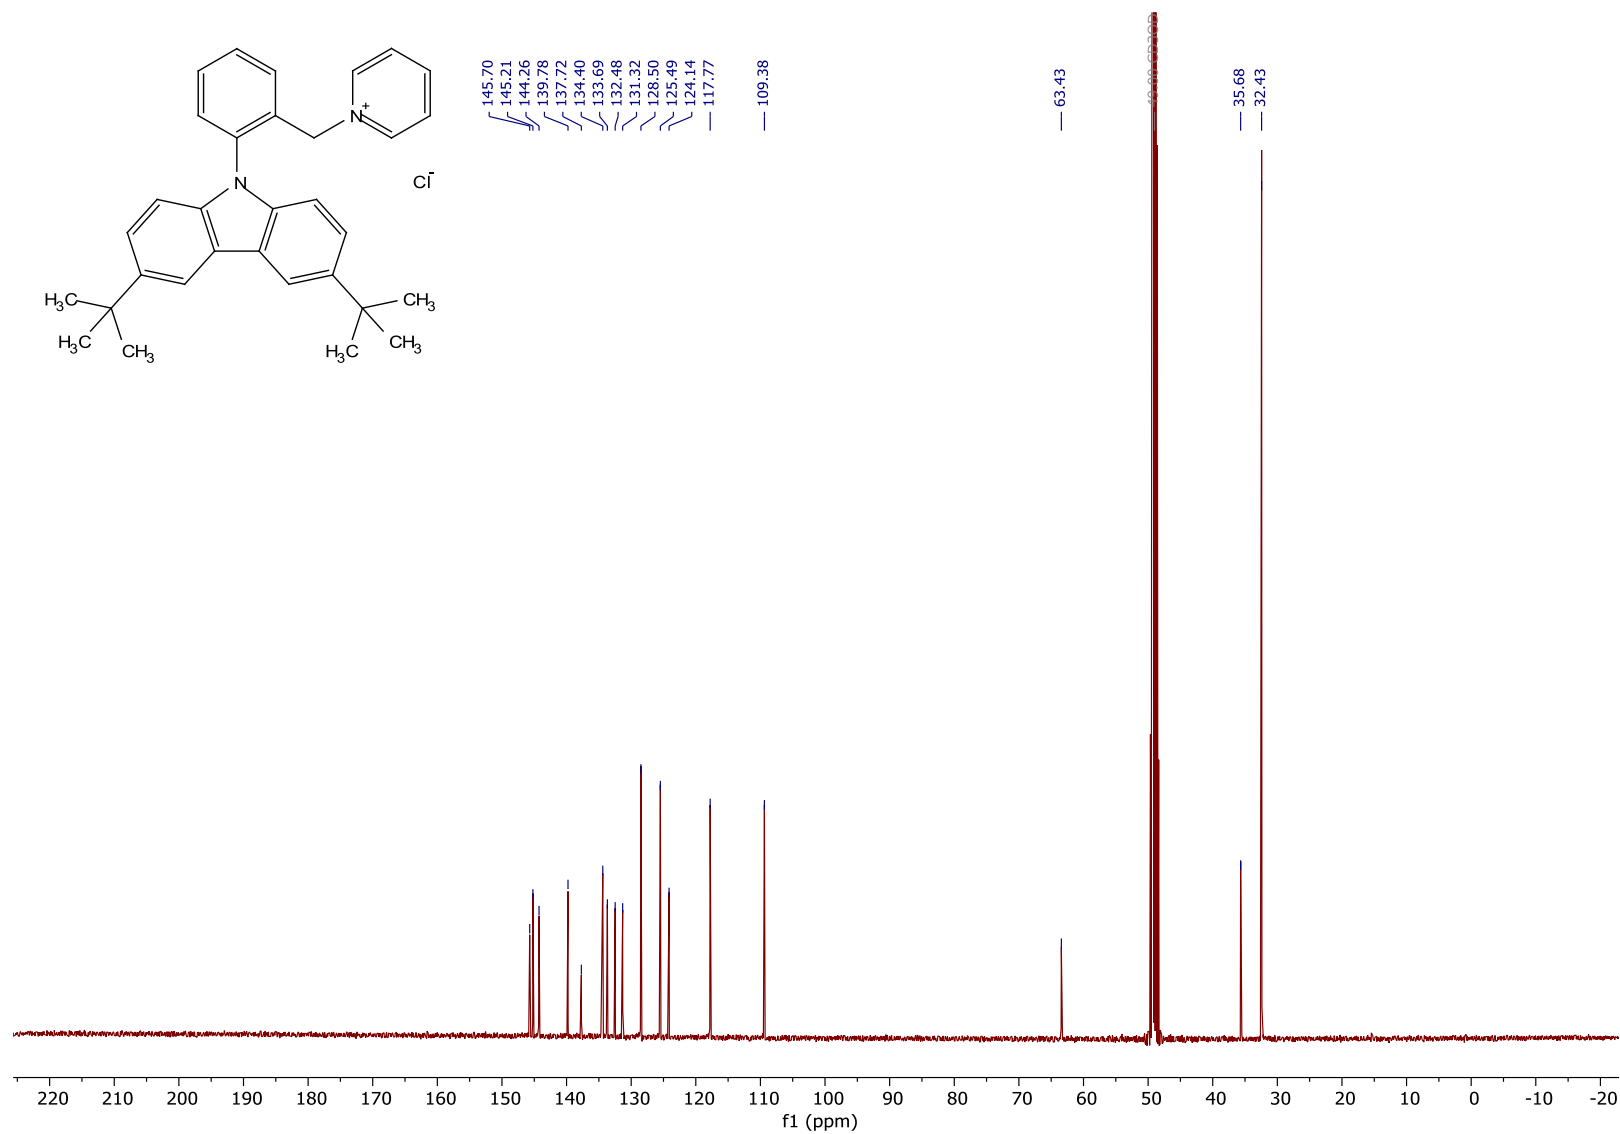

**<sup>1</sup>H NMR** (400 MHz, CD<sub>3</sub>OD, ppm) spectrum of 1-(2-(3,6-di-*tert*-butyl-9*H*-carbazol-9-yl)benzyl)pyridin-1-ium perchlorate (**4b**)

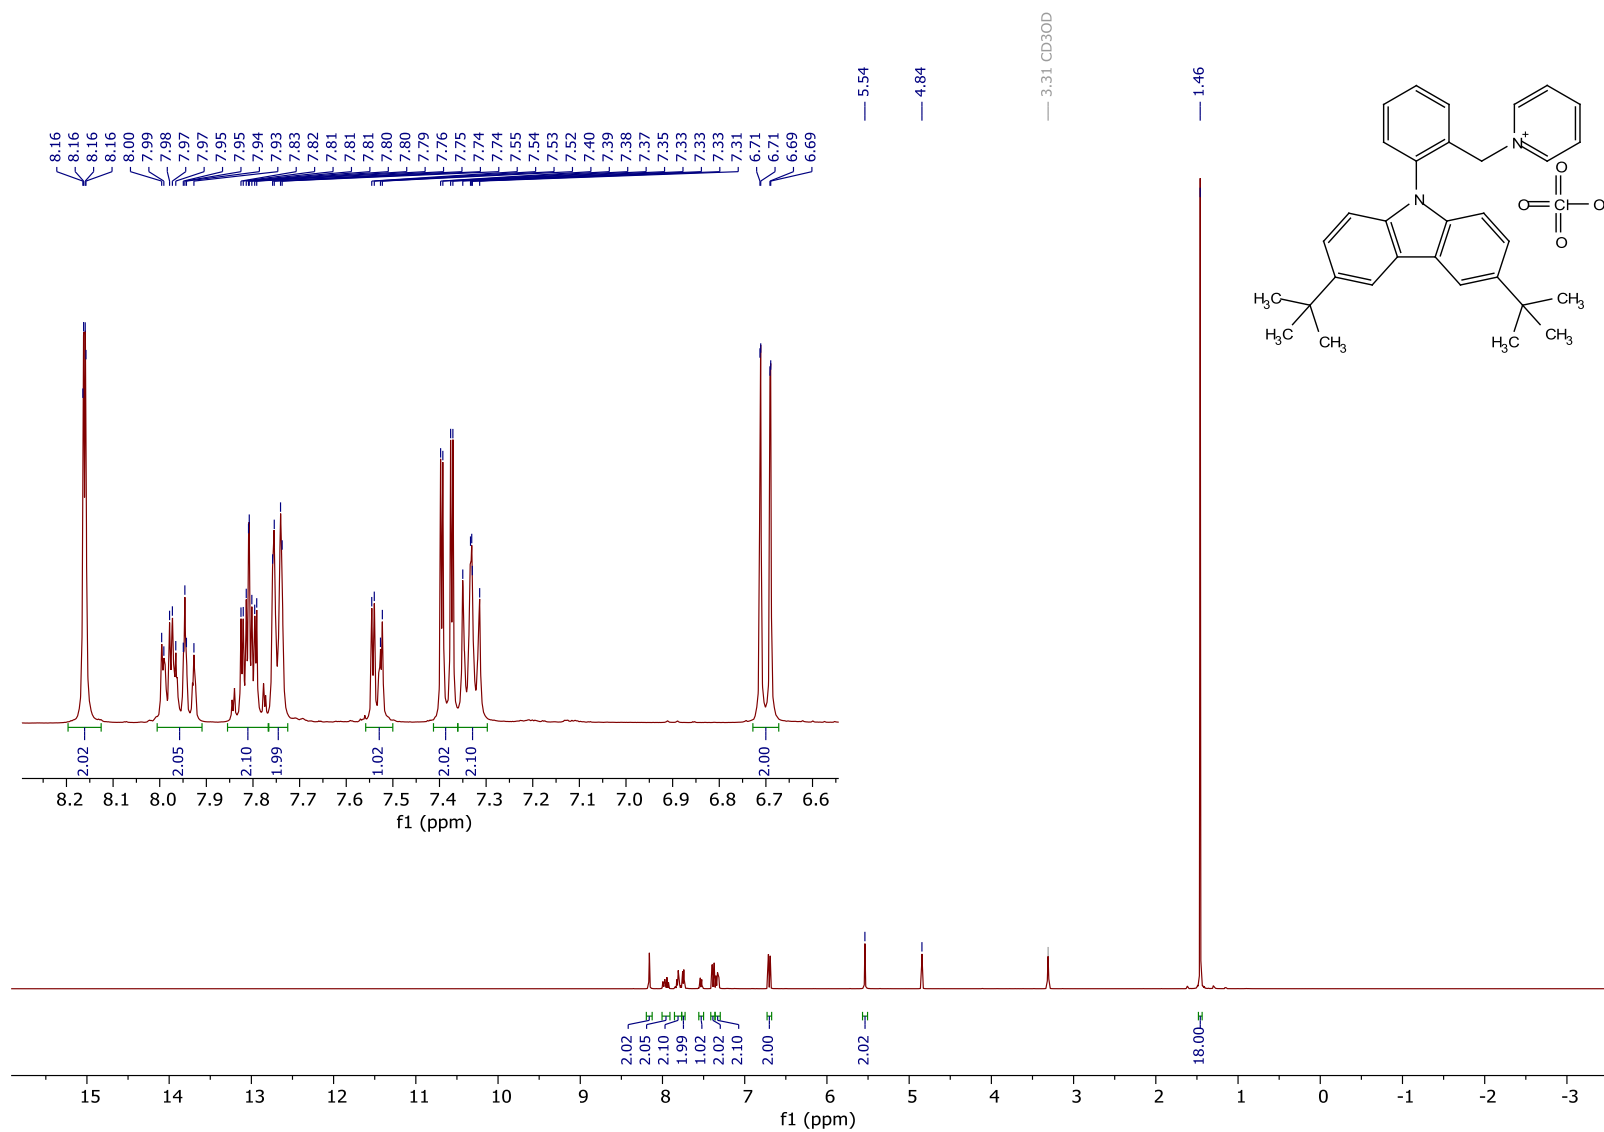



$^{13}\text{C}\{^1\text{H}\}$  NMR (101 MHz,  $\text{CD}_3\text{OD}$ , ppm) spectrum of 1-(2-(3,6-di-*tert*-butyl-9*H*-carbazol-9-yl)benzyl)pyridin-1-ium perchlorate (**4b**)

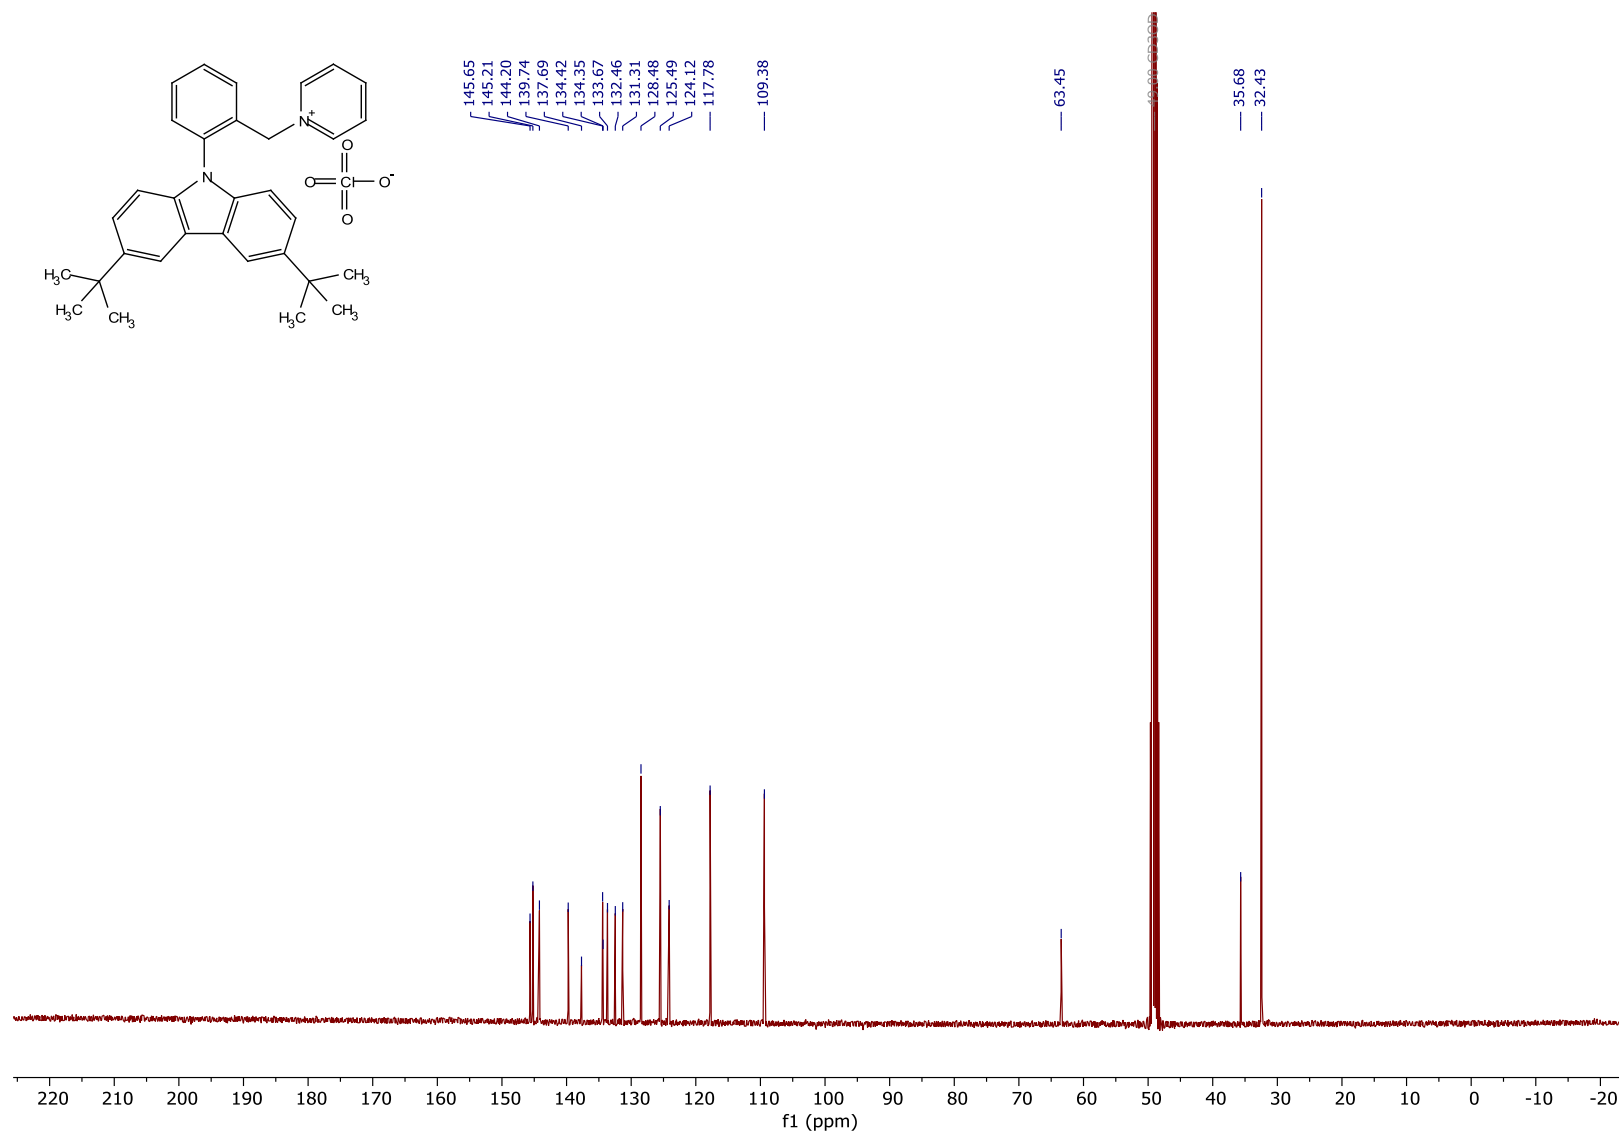

**<sup>1</sup>H NMR** (400 MHz, CDCl<sub>3</sub>, ppm) spectrum of ethyl 2-(9*H*-carbazol-9-yl)benzoate (**9**)

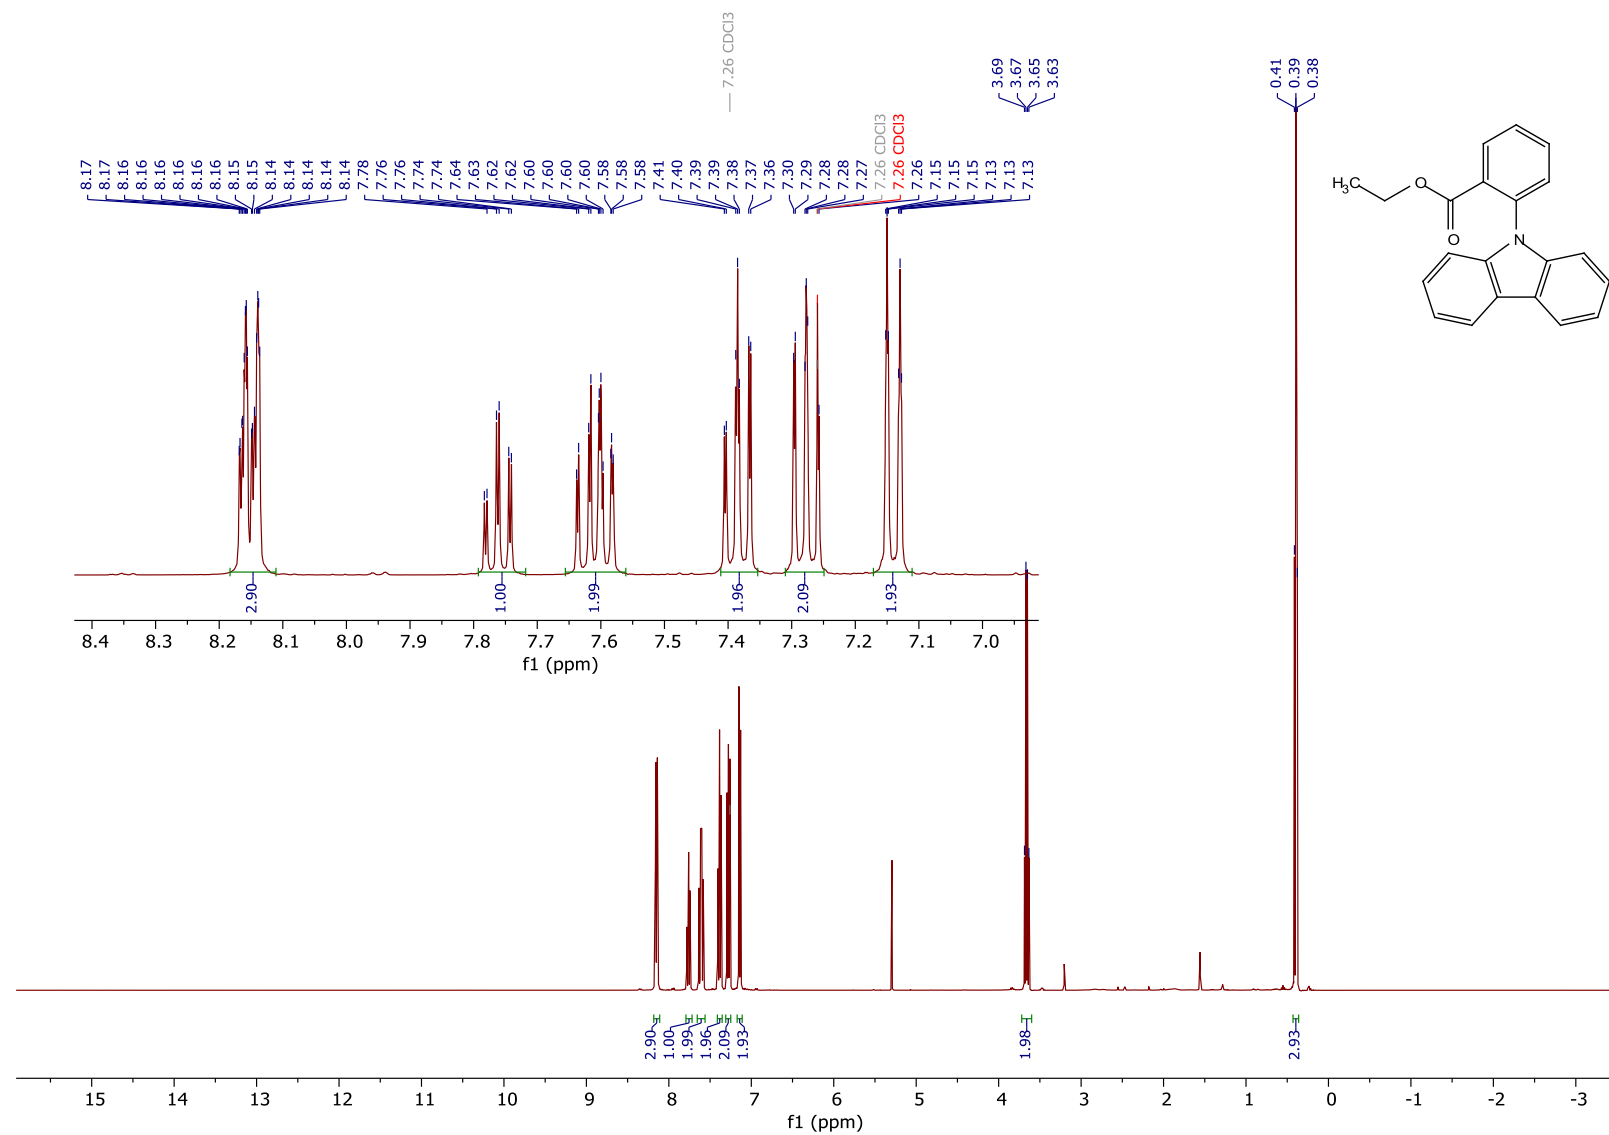

$^{13}\text{C}\{^1\text{H}\}$  NMR (101 MHz,  $\text{CDCl}_3$ , ppm) spectrum of ethyl 2-(9*H*-carbazol-9-yl)benzoate (**9**)

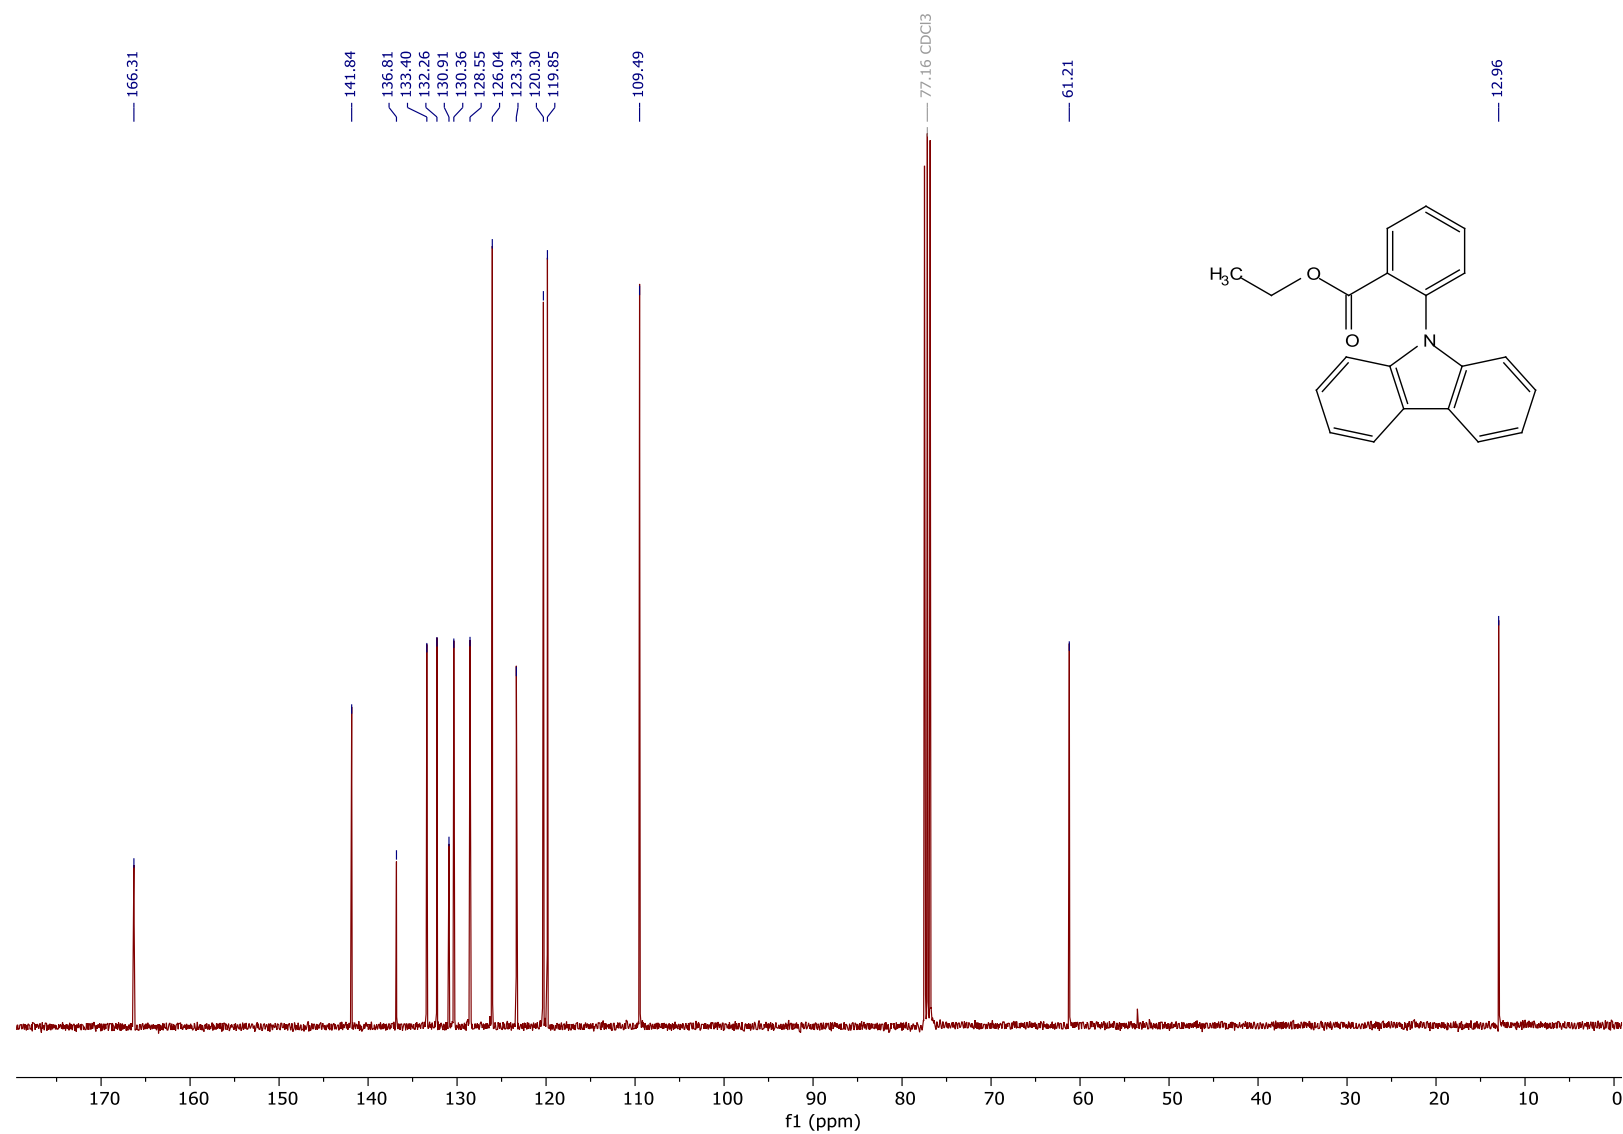

**<sup>1</sup>H NMR** (400 MHz, CDCl<sub>3</sub>, ppm) spectrum of ethyl 2-(3,6-dimethyl-9*H*-carbazol-9-yl)benzoate (**10**)

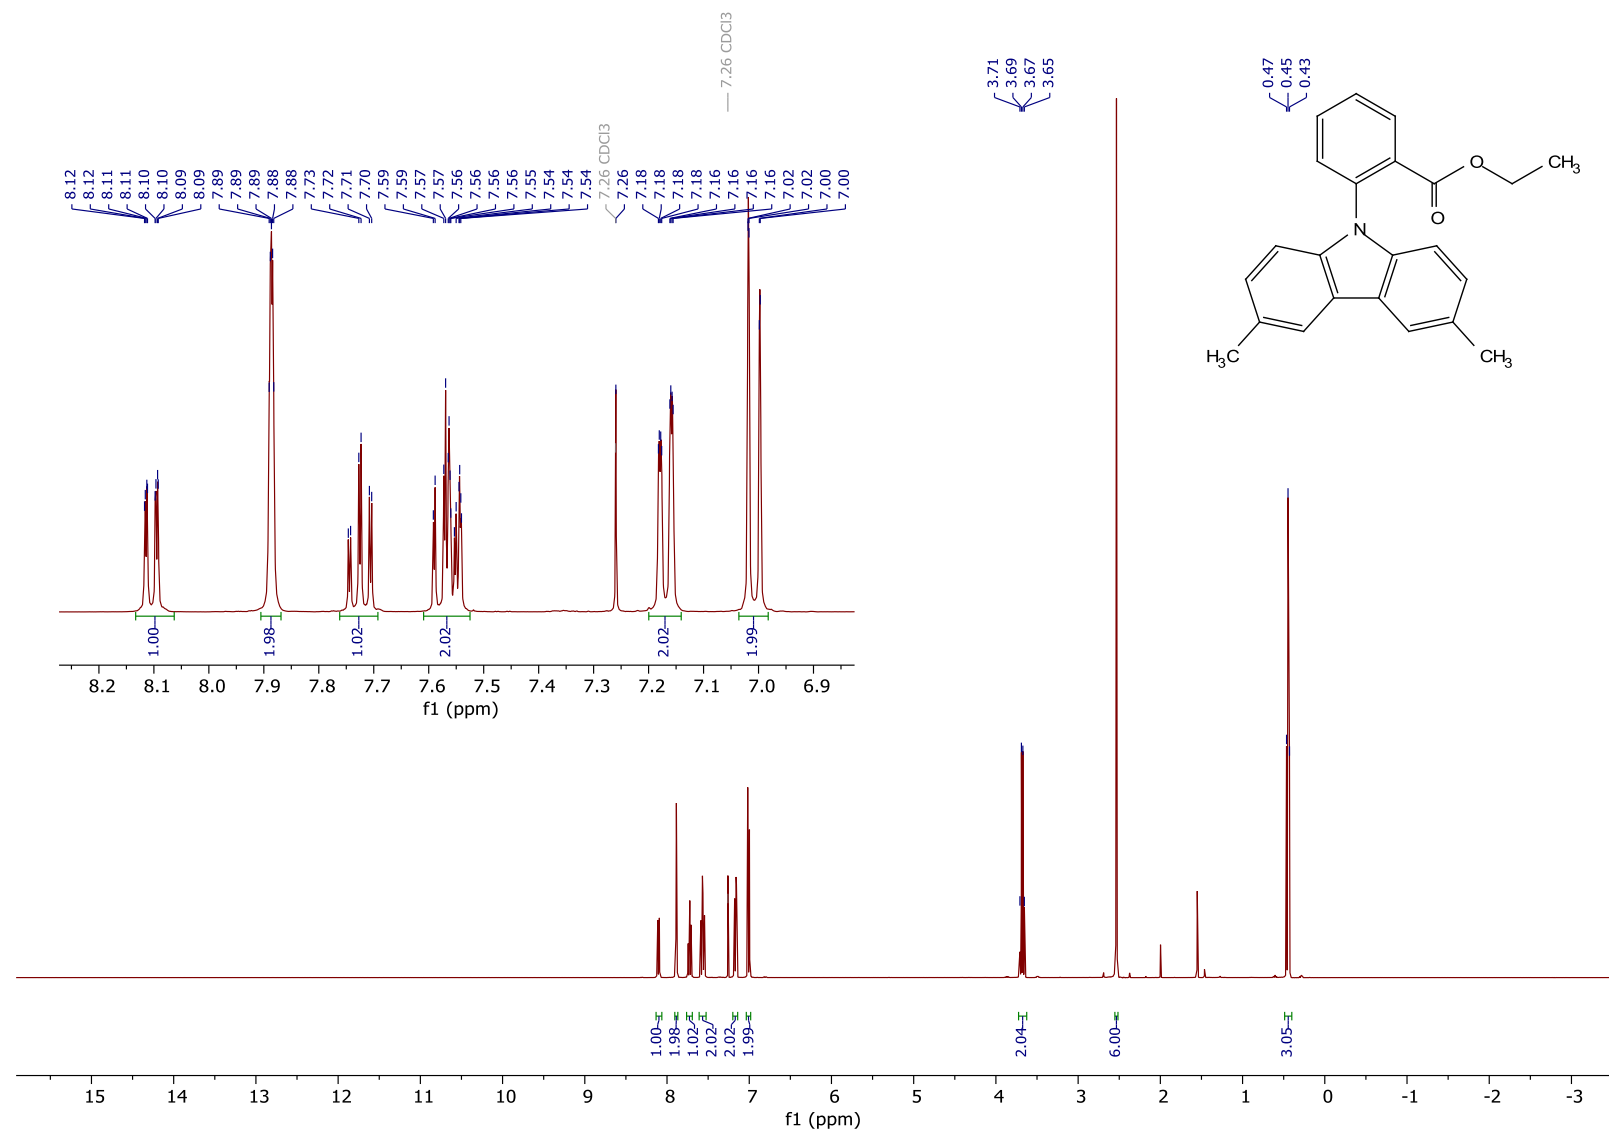

$^{13}\text{C}\{^1\text{H}\}$  NMR (101 MHz,  $\text{CDCl}_3$ , ppm) spectrum of ethyl 2-(3,6-dimethyl-9*H*-carbazol-9-yl)benzoate (**10**)

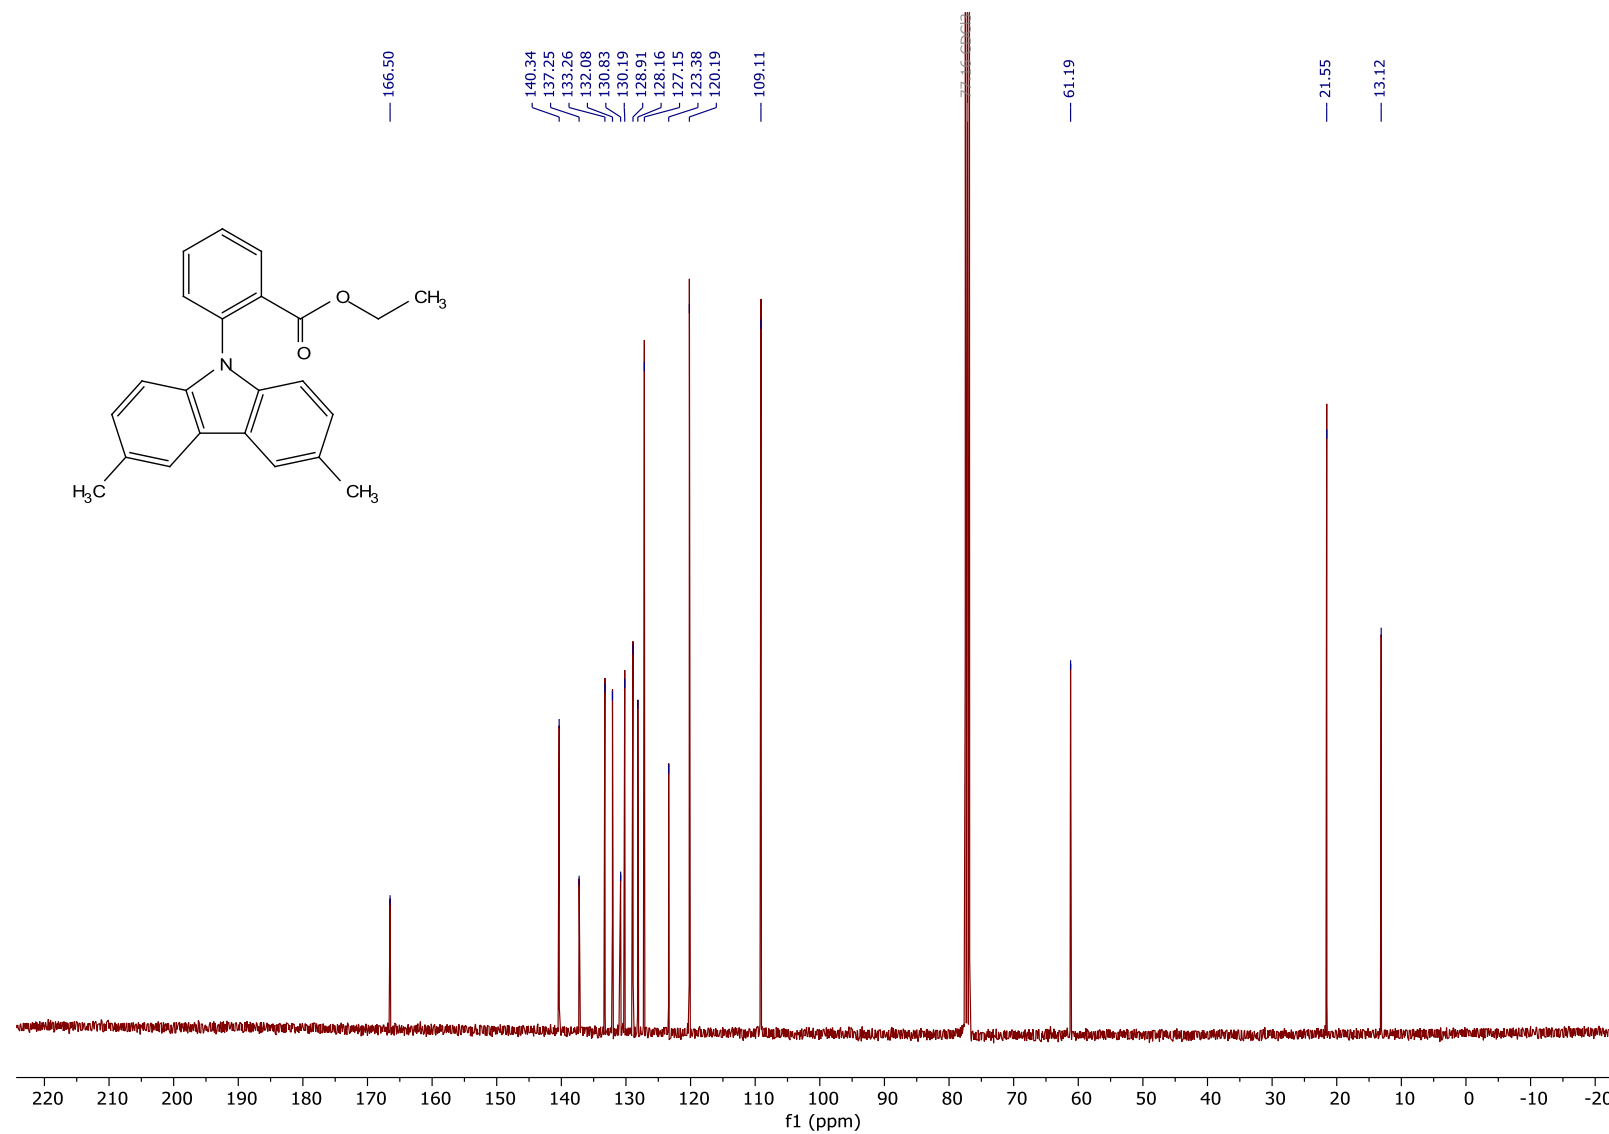

**<sup>1</sup>H NMR** (400 MHz, CDCl<sub>3</sub>, ppm) spectrum of ethyl 2-(3,6-di-*tert*-butyl-9*H*-carbazol-9-yl)benzoate (**11**)

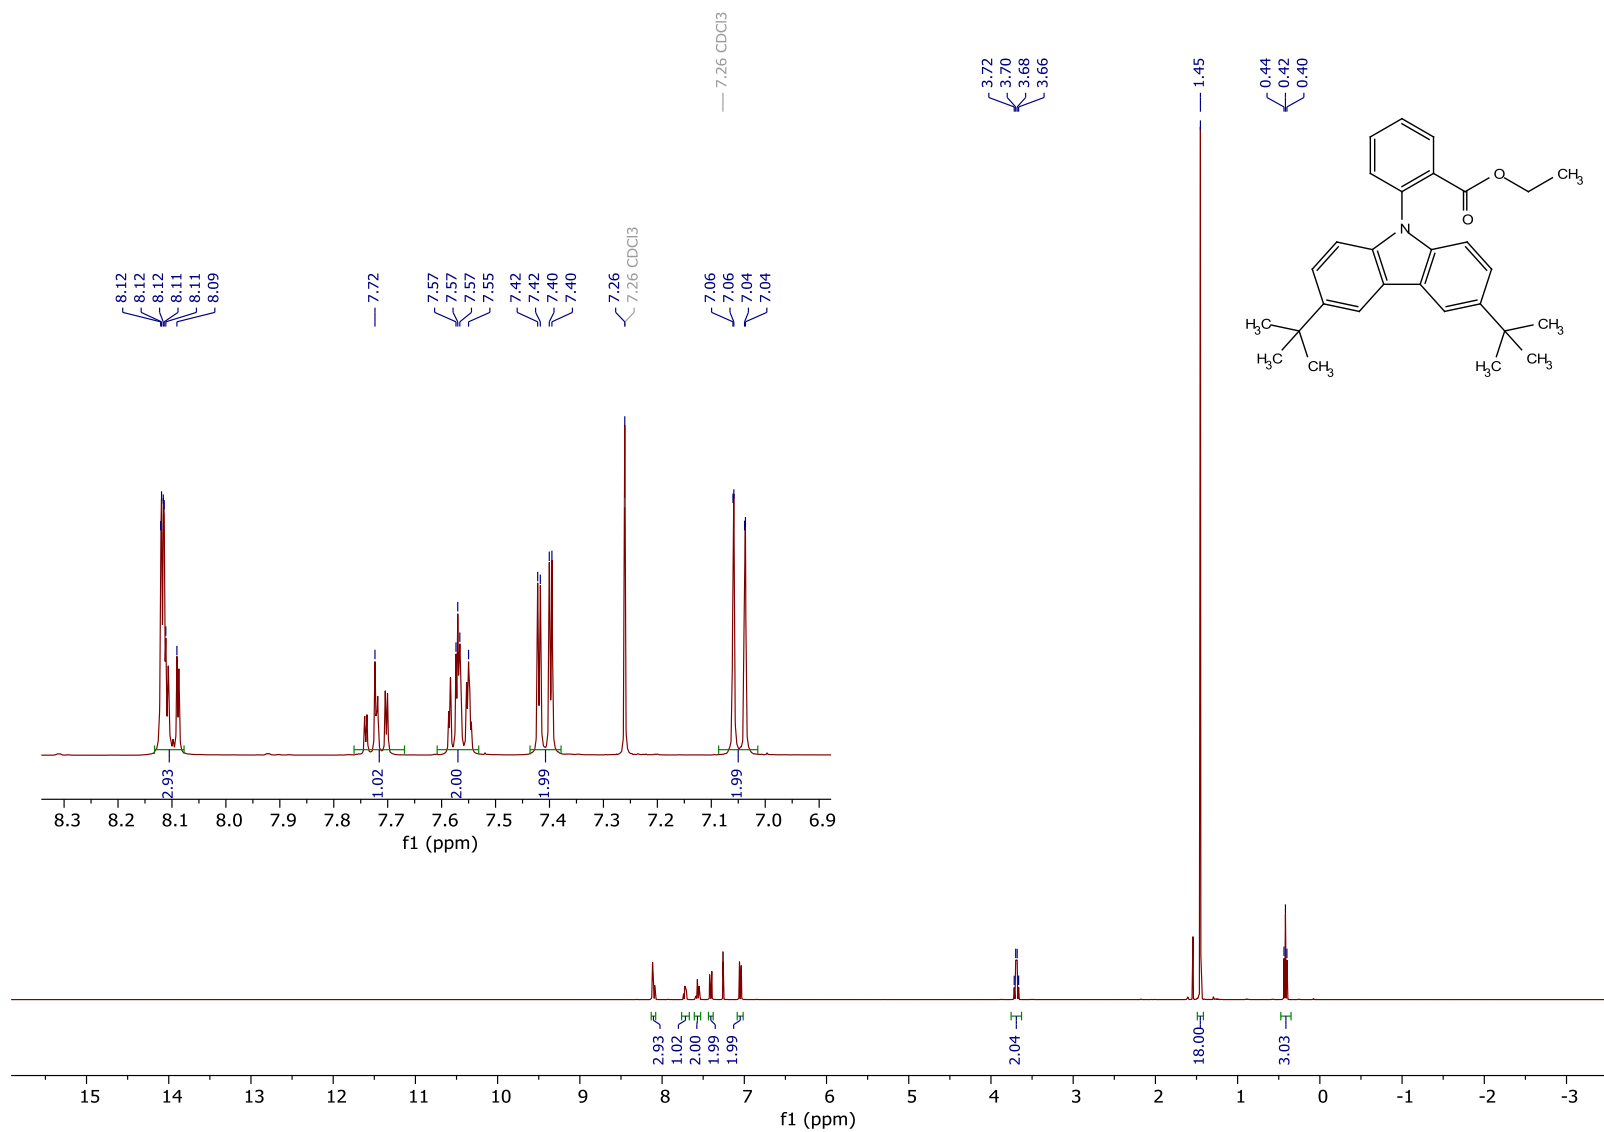

$^{13}\text{C}\{^1\text{H}\}$  NMR (101 MHz,  $\text{CDCl}_3$ , ppm) spectrum of ethyl 2-(3,6-di-*tert*-butyl-9*H*-carbazol-9-yl)benzoate (**11**)

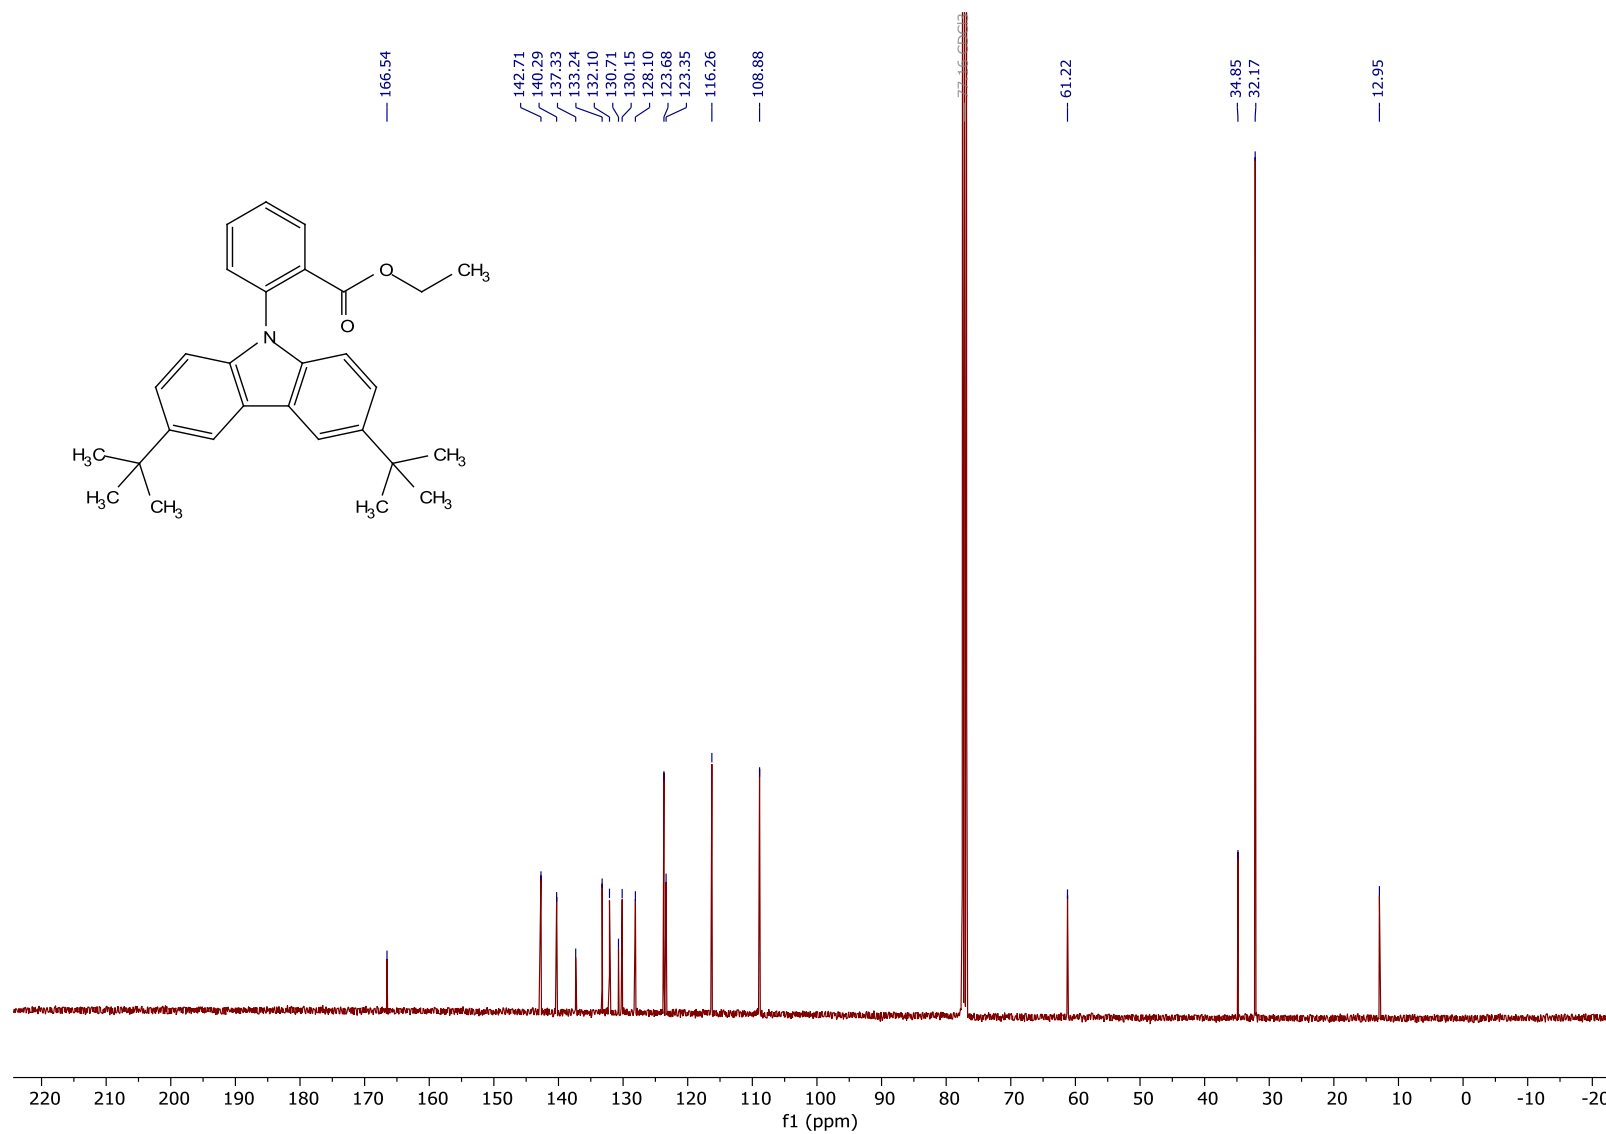

**<sup>1</sup>H NMR** (400 MHz, CDCl<sub>3</sub>, ppm) spectrum of (2-(9*H*-carbazol-9-yl)phenyl)methanol (**12**)

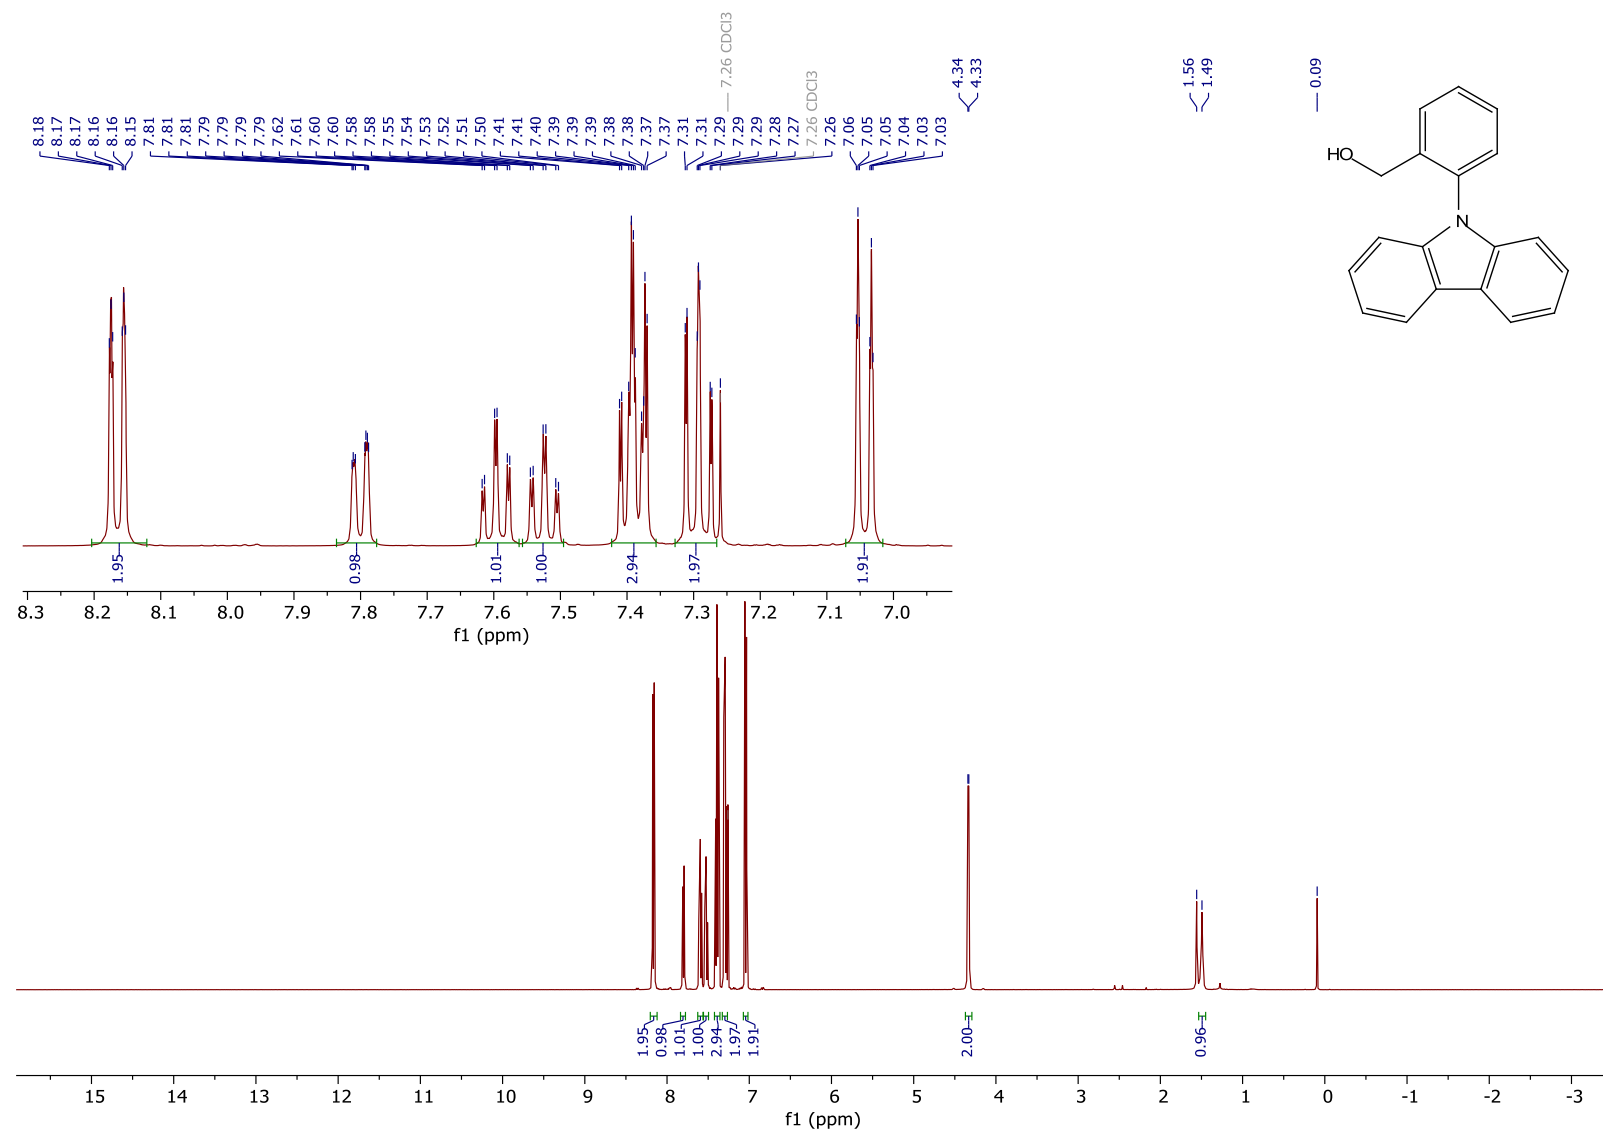



$^{13}\text{C}\{^1\text{H}\}$  NMR (101 MHz,  $\text{CDCl}_3$ , ppm) spectrum of (2-(9*H*-carbazol-9-yl)phenyl)methanol (**12**)

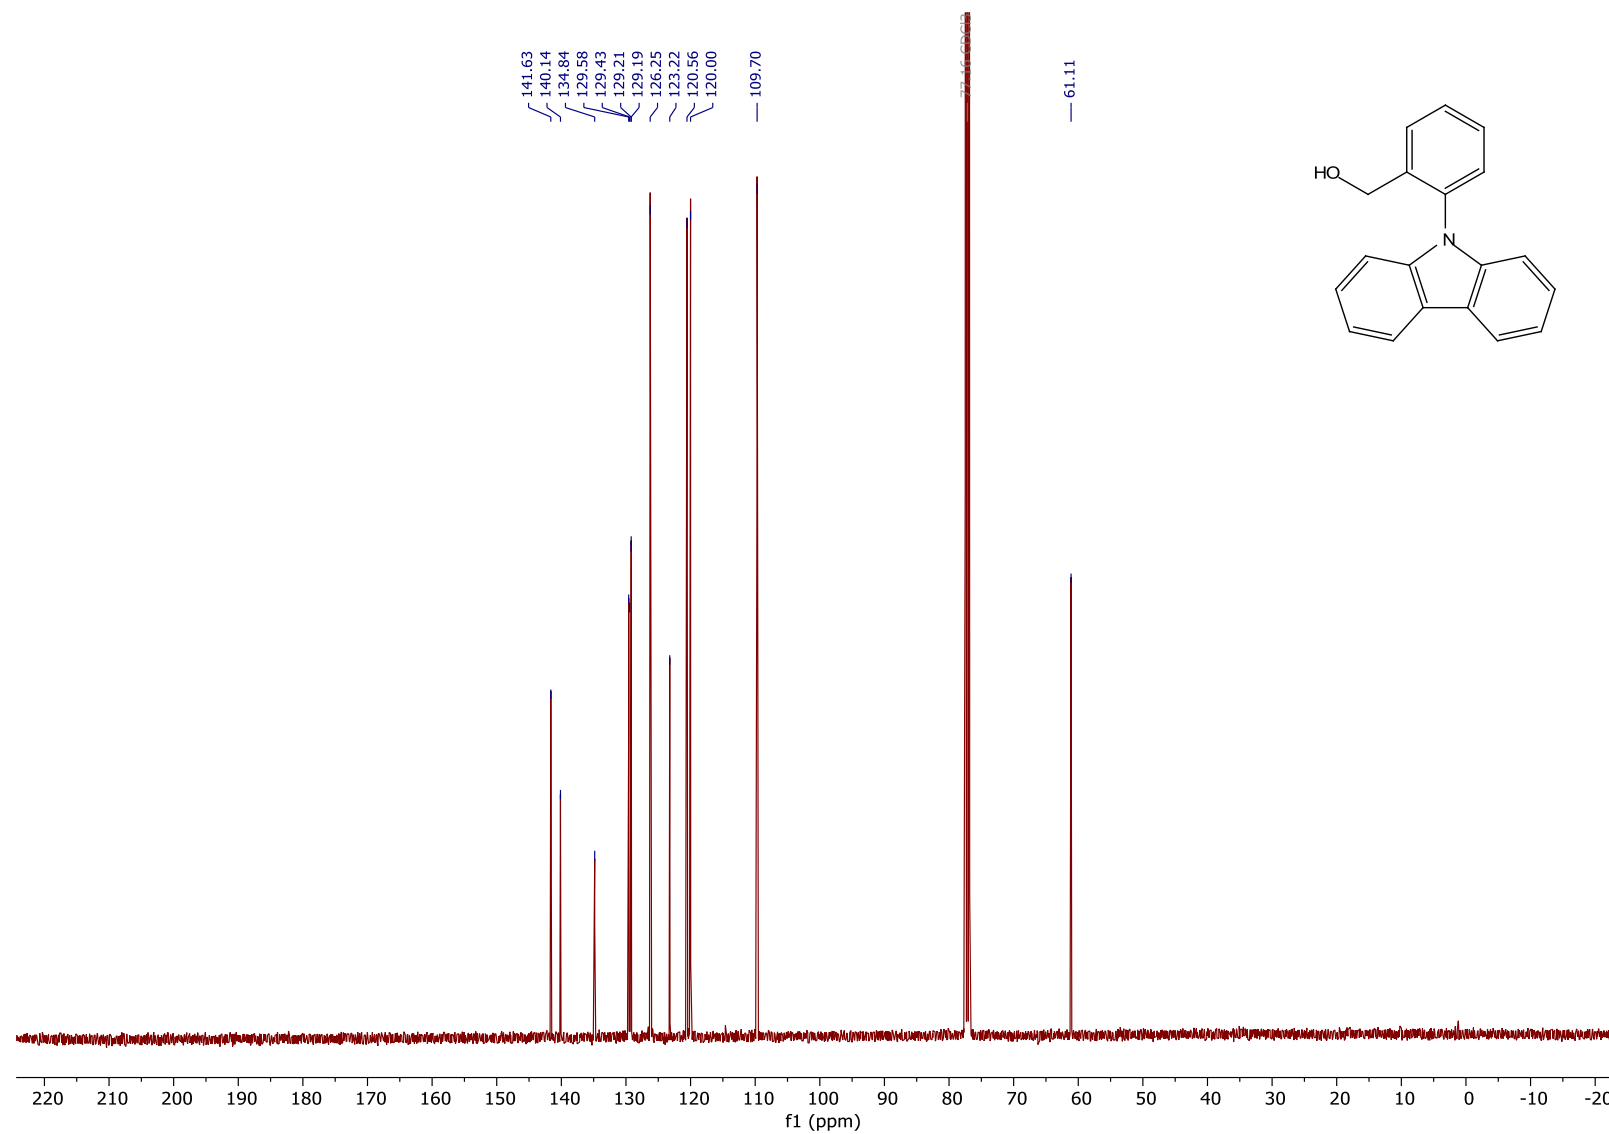

**<sup>1</sup>H NMR** (400 MHz, CDCl<sub>3</sub>, ppm) spectrum of (2-(3,6-dimethyl-9*H*-carbazol-9-yl)phenyl)methanol (**13**)

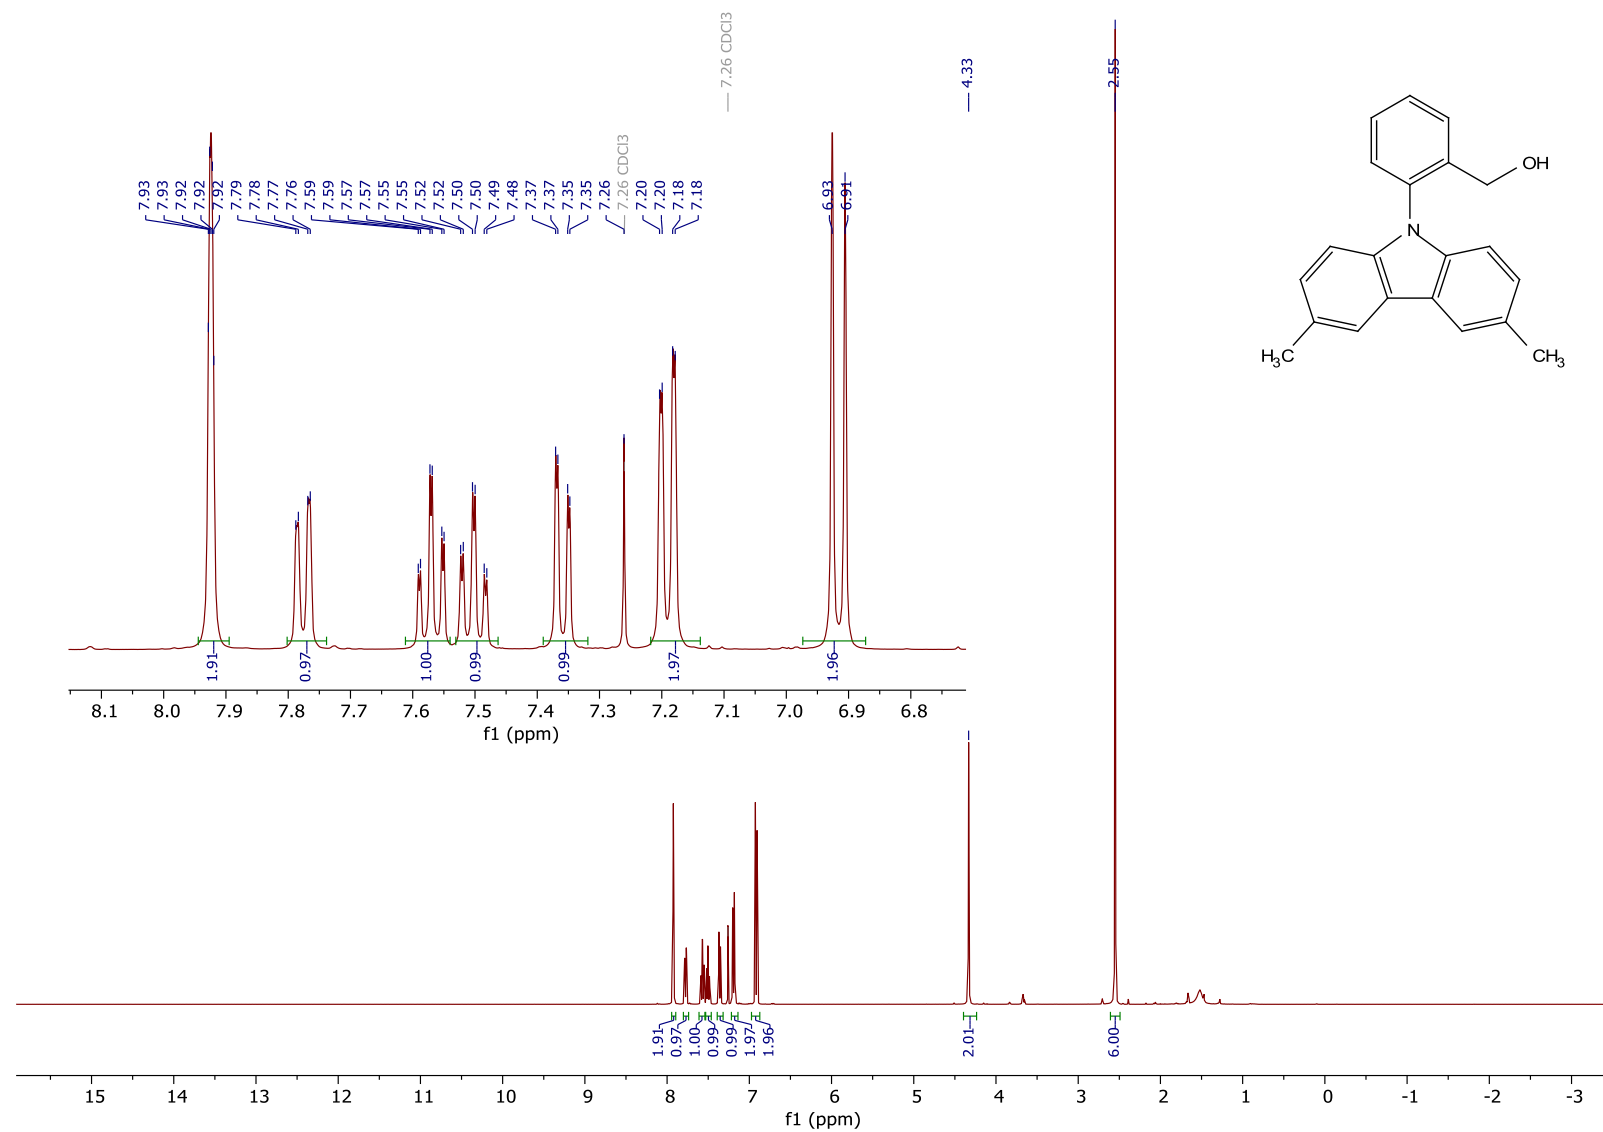

$^{13}\text{C}\{^1\text{H}\}$  NMR (101 MHz,  $\text{CDCl}_3$ , ppm) spectrum of (2-(3,6-dimethyl-9*H*-carbazol-9-yl)phenyl)methanol (**13**)

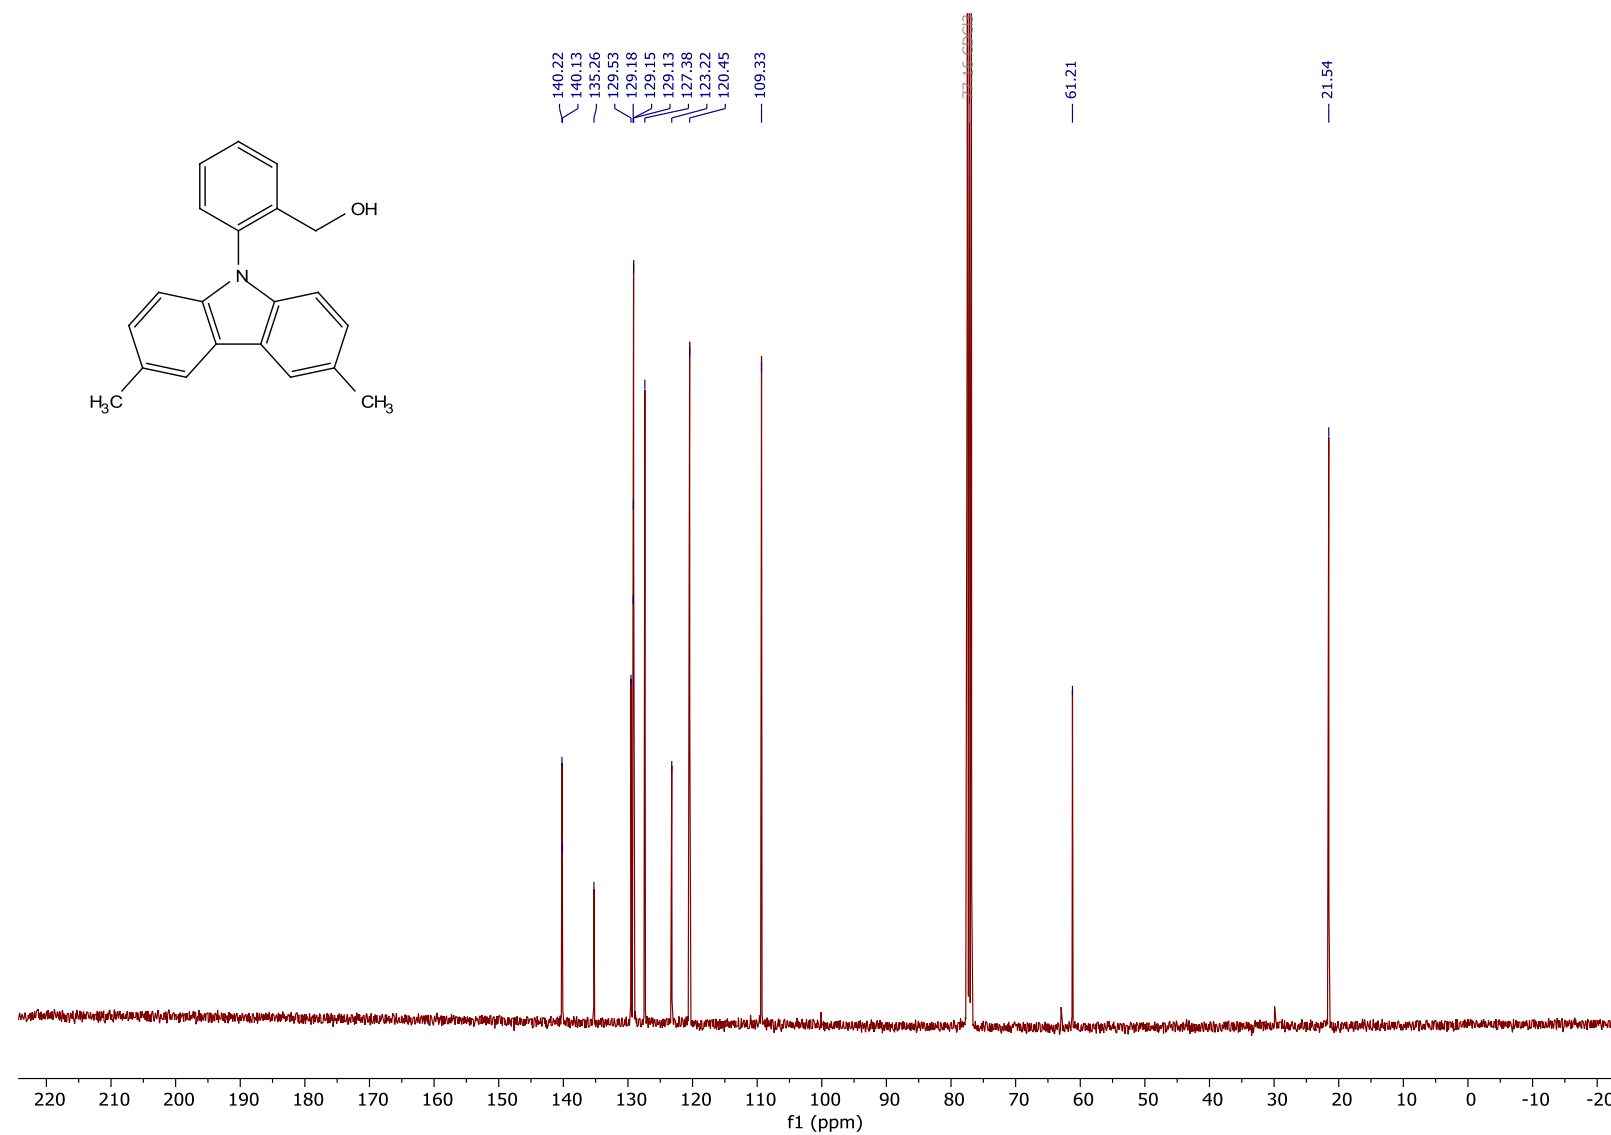

**<sup>1</sup>H NMR** (400 MHz, CDCl<sub>3</sub>, ppm) spectrum of (2-(3,6-di-*tert*-butyl-9*H*-carbazol-9-yl)phenyl)methanol (**14**)

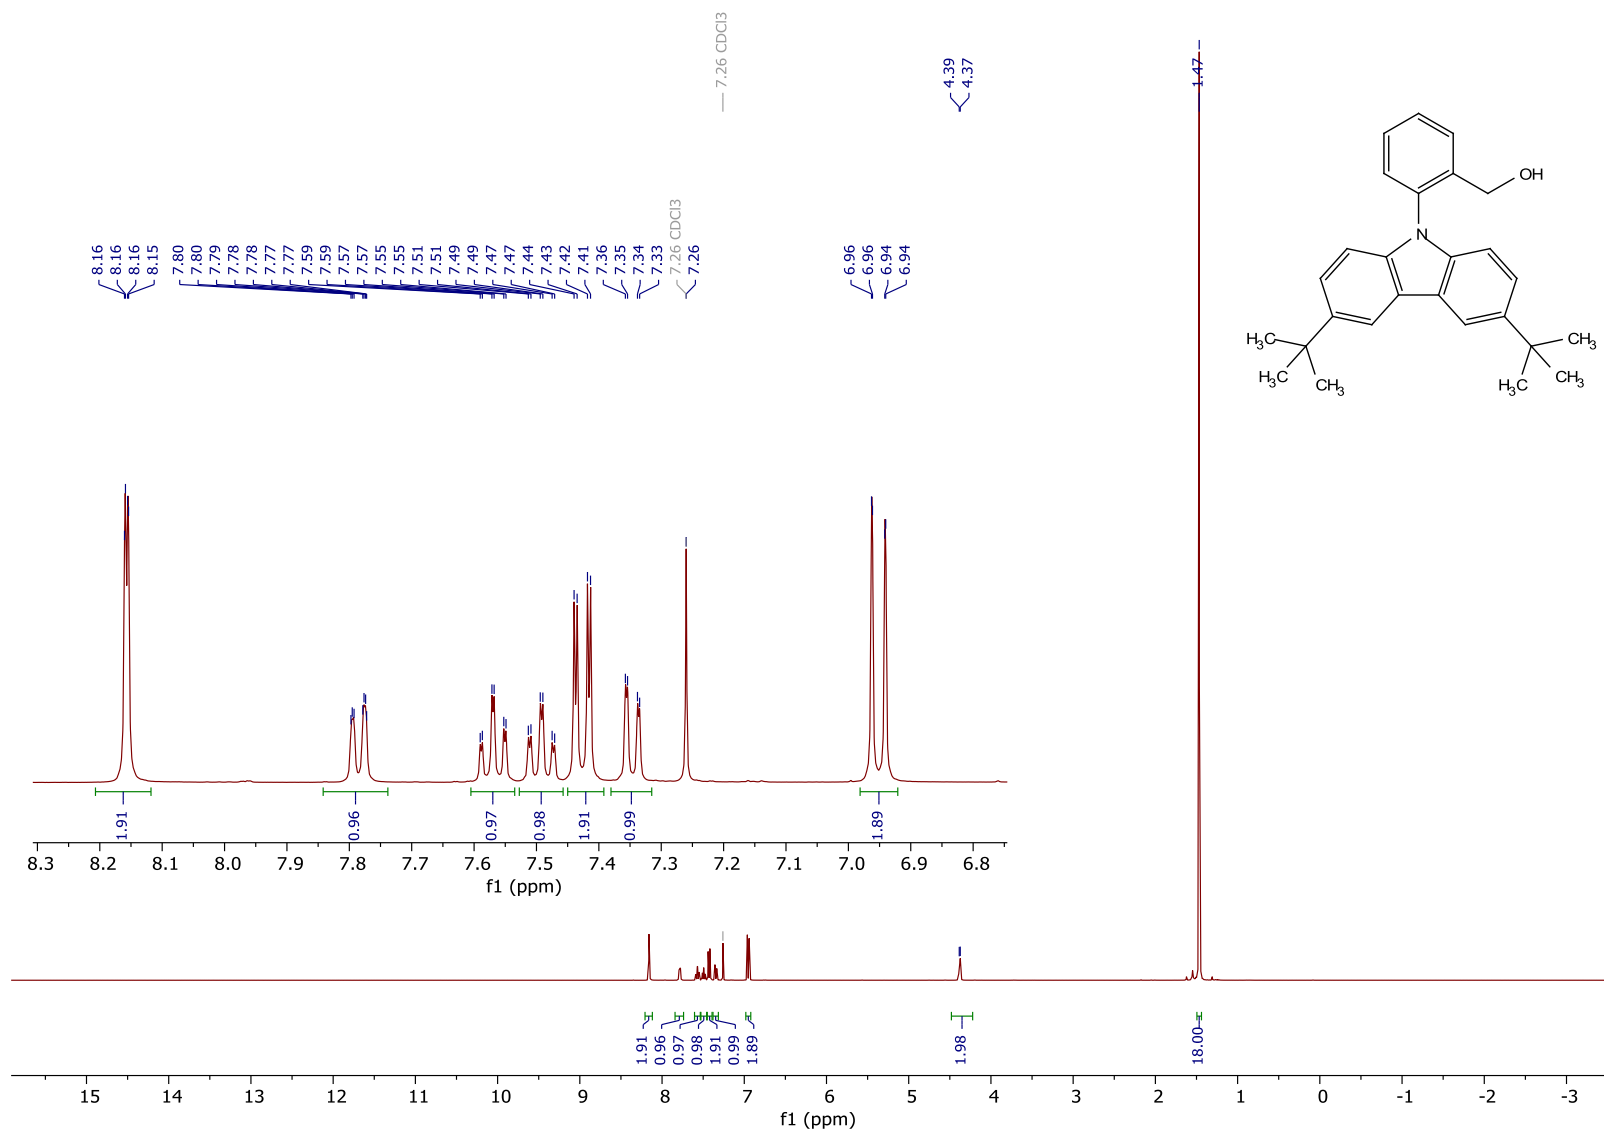

$^{13}\text{C}\{^1\text{H}\}$  NMR (101 MHz,  $\text{CDCl}_3$ , ppm) spectrum of (2-(3,6-di-*tert*-butyl-9*H*-carbazol-9-yl)phenyl)methanol (**14**)

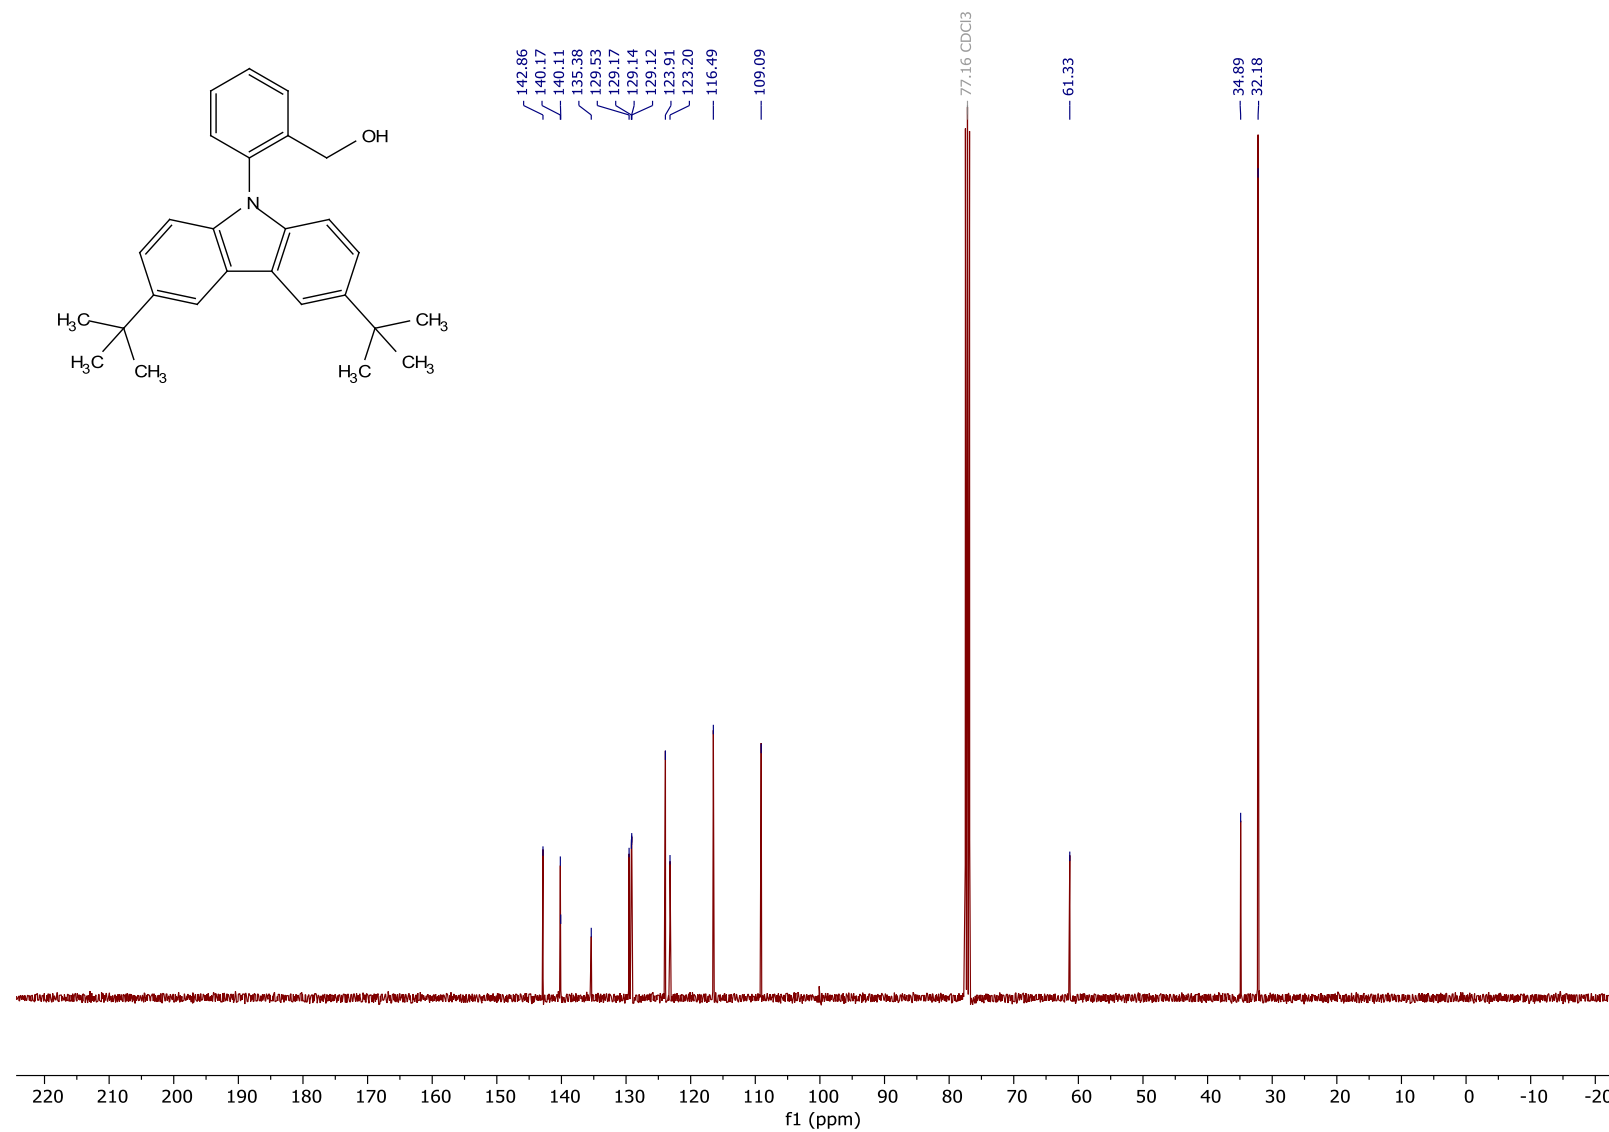

Supplement: d3cc01674a1.pdf [file d3cc01674a1.pdf]
